# Supplementary material for: Synthesis of novel chiral heterometallic terpene oximates: unusual generation of an aluminium enolate by a cooperative effect
Source: Royal Society of Chemistry journal article supplement (doi:10.1039/c6dt02116f), 2016-01-01
Supplement: c6dt02116f1.pdf [file c6dt02116f1.pdf]

## Supporting Information for

### Synthesis of Novel Chiral Heterometallic Terpene Oximates: Unusual Generation of an Aluminium Enolate by a Cooperative Effect

M. Fernández-Millán, M. Temprado, J. Cano,\* T. Cuenca and M.E.G. Mosquera.\*

*Departamento de Química Orgánica y Química Inorgánica, University of Alcalá. Campus Universitario, Ctra. Madrid-Barcelona Km. 33,600, E-28805, Alcalá de Henares (Madrid)*  
Email: [martaeg.mosquera@uah.es](mailto:martaeg.mosquera@uah.es)

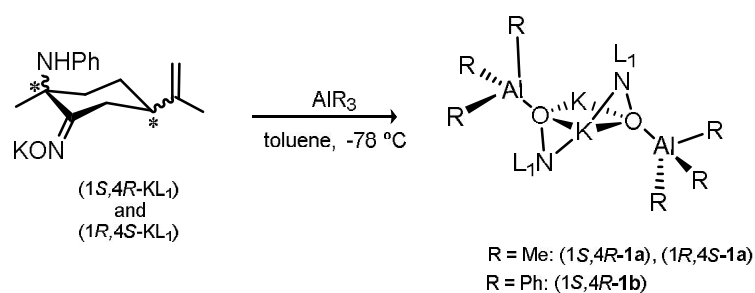

**Scheme S1.** Synthesis of compounds **1a** and **(1*S*, 4*R*)-1b**

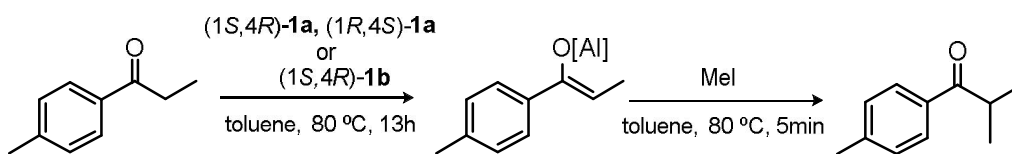

**Scheme S2.** Alkylation of *p*-methylpropiophenone.

## CONTENS

### I. Experimental details and physical data

1. Synthesis of (1*S*,4*R*)-HONL<sub>1</sub> and (1*R*,4*S*)-HONL<sub>1</sub>.
2. Synthesis of (1*S*,4*R*)-KONL<sub>1</sub> and (1*R*,4*S*)-KONL<sub>1</sub>.
3. Synthesis of [AlMe<sub>3</sub>K(tol)({1*S*,4*R*}-ONL<sub>1</sub>)<sub>2</sub> ((1*S*,4*R*)-1a) and [AlMe<sub>3</sub>K(tol)({1*R*,4*S*}-ONL<sub>1</sub>)<sub>2</sub> ((1*R*,4*S*)-1a).
4. Synthesis of [AlPh<sub>3</sub>K(tol)({1*S*,4*R*}-ONL<sub>1</sub>)<sub>x</sub> (1b).
5. Synthesis of (2).
6. Synthesis of (3).
7. Synthesis of 2-methyl-1-(4-methylphenyl)-1-propanone (4).

### II. NMR Spectra

### III. Diffusion-Ordered NMR Spectroscopy (DOSY)

### IV. Single-Crystal X-ray Structure Determination

### V. Computational Details.

## I. Experimental details and physical data

**General Considerations.** All manipulations were conducted using Schlenk techniques in conjunction to an inert atmosphere glove box. All solvents were rigorously dried prior to use. NMR spectra were recorded at 400.13 ( $^1\text{H}$ ), 100.62 ( $^{13}\text{C}$ ), 40.50 ( $^{15}\text{N}$ ) and MHz on a Bruker AV400. Chemical shifts ( $\delta$ ) are given in ppm using  $\text{C}_6\text{D}_6$  as solvent.  $^1\text{H}$  and  $^{13}\text{C}$  resonances were measured relative to solvent peaks considering TMS  $\delta = 0$  ppm. Elemental analyses were obtained on a Perkin-Elmer Series II 2400 CHNS/O analyzer.

**1. Synthesis of (1*S*,4*R*)-HONL<sub>1</sub>.** Ligand was prepared as previously described in the literature.<sup>[1]</sup>

**Synthesis of (1*R*,4*S*)-HONL<sub>1</sub>.** To a mixture of *S*-limonene 6.0 g (44 mmol) and isopentylnitrite 6 mL (44 mmol), 9 mL of HCl (37%, 92.5 mmol) was added dropwise for 90 min to  $-5\text{ }^\circ\text{C}$ . The solid was filtered and washed with cold methanol. Yield: 68% (6 g, 14.96 mmol). To a suspension of this solid in 10 mL of ethanol was added 6 mL of aniline (59.85 mmol) to  $70\text{ }^\circ\text{C}$ . When the mixture was dissolved, 15 mL of HCl was added dropwise at  $-5\text{ }^\circ\text{C}$ . The solid was filtered and washed with ethanol and diethyl ether. Yield: 53 %. (4.64 g, 15.75 mmol). To a suspension of this solid in 15 ml of diethyl ether was added 4 mL of triethylamine. The mixture was stirred for 12 hours, and then was filtered. The solvent was removed under vacuum and a yellow oil was obtained. This oil was precipitated and washed with hexane.

**$^1\text{H-NMR}$**  (400.13 MHz, 298 K,  $\text{C}_6\text{D}_6$ ):  $\delta$  9.17 (s, 1H, OH), 7.09 (m, 2H, *m*- $\text{C}_6\text{H}_5\text{-H}$ ), 6.76 (m, 2H, *o*- $\text{C}_6\text{H}_5\text{-H}$ ), 6.72 (m, 1H, *p*- $\text{C}_6\text{H}_5\text{-H}$ ), 4.70 (s, 2H, = $\text{CH}_2$ ), 3.60 (m, 1H, - $\text{CH}_2^3$ ), 3.10 (s, 1H, NH), 2.08, (m, 1H, - $\text{CH}_2^3$ ), 2.05 (m, 1H, - $\text{CH}^4$ ), 1.56 (m, 1H, - $\text{CH}_2^5$ ), 1.55 (s, 3H,  $\text{CH}_3\text{-C=}$ ), 1.53 (s, 3H,  $\text{CH}_3\text{-C}^1$ ), 1.38 (m, 1H,  $\text{CH}_2^6$ ), 1.37 (m, 1H, - $\text{CH}_2^5$ ), 1.29 (m, 1H,  $\text{CH}_2^6$ ).

**$^{13}\text{C-NMR}$**  (100.62 MHz, 298 K,  $\text{C}_6\text{D}_6$ ):  $\delta$  164.6 ( $-\text{C}^2$ ) 148.2 ( $-\text{C}=\text{CH}_2$ ), 146.8 ( $\text{C}_{\text{ipso}}$ ), 129.5, 118.8, 115.5, ( $-\text{C}_6\text{H}_5$ ), 109.8 ( $\text{CH}_2=$ ), 56.9 ( $\text{C}^1$ ), 45.9 ( $\text{CH}^4$ ), 43.1 ( $\text{CH}_2^6$ ), 26.6 ( $\text{CH}_2^5$ ), 26.3 ( $\text{CH}_2^3$ ), 23.2 ( $\text{CH}_3\text{-C}^1$ ), 20.6 ( $\text{CH}_3\text{-C=}$ ).

**E.A. (%)**  $\text{C}_{16}\text{H}_{22}\text{N}_2\text{O}$  (258.17): *calcd.*: C = 74.38, N = 10.84, H = 8.58. *found.*: C = 74.56, N = 10.84, H = 8.13.

**2. Synthesis of (1*S*,4*R*)-KONL<sub>1</sub> and (1*R*,4*S*)-KONL<sub>1</sub>.** To a solution of 0.30 g (1.15 mmol) of (1*S*,4*R*) and (1*R*,4*S*) -1-phenylamino-4-isopropenyl-1-methyl-6-cyclohexanoxime ((1*S*,4*R*) and (1*R*,4*S*) -HONL<sub>1</sub>) in 20 mL of toluene, 0.15 g (1.15 mmol) of KBn were added, in a cold bath of dry ice/isopropanol, and the mixture was stirred for 30 min. The solvent was removed under vacuum and a yellow solid was isolated, which was washed with hexane. Yield: 90%

<sup>1</sup>H-NMR (400.13 MHz, 298 K, C<sub>6</sub>D<sub>6</sub>): δ 7.13 (m, 2H, *m*-C<sub>6</sub>H<sub>5</sub>-H), 6.76 (m, 2H, *o*-C<sub>6</sub>H<sub>5</sub>-H), 6.71 (m, 1H, *p*-C<sub>6</sub>H<sub>5</sub>-H), 4.91 (br, 1H, =CH<sub>2</sub>), 4.82 (br, 1H, =CH<sub>2</sub>), 3.70 (m, 1H, -CH<sub>2</sub><sup>3</sup>), 3.37 (s, 1H, NH), 2.24, (m, 1H, -CH<sup>4</sup>), 1.99 (m, 1H, -CH<sub>2</sub><sup>3</sup>), 1.72 (s, 3H, CH<sub>3</sub>-C=), 1.62 (m, 1H, CH<sub>2</sub><sup>5</sup>), 1.59 (m, 2H, CH<sub>2</sub><sup>6</sup>), 1.51 (m, 1H, CH<sub>2</sub><sup>5</sup>), 1.51 (s, 3H, CH<sub>3</sub>-C<sup>1</sup>).

<sup>13</sup>C-NMR (100.62 MHz, 298 K, C<sub>6</sub>D<sub>6</sub>): δ 157.4 (-C<sup>2</sup>) 149.5 (-C=CH<sub>2</sub>), 147.7(C<sub>ipso</sub>), 129.1, 118.4, 116.0, (-C<sub>6</sub>H<sub>5</sub>), 109.5 (CH<sub>2</sub>=), 57.3 (C<sup>1</sup>), 45.5 (CH<sup>4</sup>), 42.2 (CH<sub>2</sub><sup>6</sup>), 27.1 (CH<sub>2</sub><sup>3</sup>), 25.5 (CH<sub>2</sub><sup>5</sup>), 24.9(CH<sub>3</sub>-C<sup>1</sup>), 20.9 (CH<sub>3</sub>-C=).

**A.E. (%)** C<sub>16</sub>H<sub>21</sub>ON<sub>2</sub>K·1/4 C<sub>7</sub>H<sub>8</sub> (296.13): *calcd*: C = 66.73, N = 8.77, H = 7.26. *found*: C = 66.63, N = 9.10, H = 7.62.

**3. Synthesis of [AlMe<sub>3</sub>K(tol)(ONL<sub>1</sub>)]<sub>2</sub> ((1*S*, 4*R*) and (1*R*, 4*S*)-1a).** To a solution of 0.344 g (1.15 mmol) of ((1*S*, 4*R*) and (1*R*, 4*S*) -KONL<sub>1</sub>) in 20 mL of toluene, 0.58 mL of AlMe<sub>3</sub> (2M in toluene, 1.15 mmol) were added in a cold bath of dry ice/isopropanol. The solution was stirred for 30 min, filtered and conserved to -5 °C. After one day colorless crystals of compound (1*S*, 4*R*)-1a were observed. Yield: 97% (0.417 g, 0.56 mmol).

<sup>1</sup>H-NMR (400.13 MHz, 298 K, C<sub>6</sub>D<sub>6</sub>): δ 7.31 (m, 2H, *m*-C<sub>6</sub>H<sub>5</sub>-H), 6.83 (m, 1H, *p*-C<sub>6</sub>H<sub>5</sub>-H), 6.81 (m, 2H, *o*-C<sub>6</sub>H<sub>5</sub>-H), [Tol: 7.13 (m, 2H, *m*-C<sub>6</sub>H<sub>5</sub>-H), 7.05 (*p*-C<sub>6</sub>H<sub>5</sub>-H), 7.01 (m, 2H, *o*-C<sub>6</sub>H<sub>5</sub>-H), 2.11 (s, 3H, -CH<sub>3</sub>)], 4.90 (br, 1H, =CH<sub>2</sub>), 4.80 (br, 1H, =CH<sub>2</sub>), 3.32 (m, 1H, -CH<sub>2</sub><sup>3</sup>), 3.15 (s, 1H, -NH), 2.26 (m, 1H, -CH<sup>4</sup>), 2.23 (m, 1H, -CH<sub>2</sub><sup>3</sup>), 1.69 (s, 3H, CH<sub>3</sub>-C=), 1.67 (m, 1H, CH<sub>2</sub><sup>5</sup>), 1.57 (m, 2H, CH<sub>2</sub><sup>6</sup>), 1.51 (m, 1H, CH<sub>2</sub><sup>5</sup>), 1.38 (s, 3H, CH<sub>3</sub>-C<sup>1</sup>), -0.67 (s, 9H, Al-CH<sub>3</sub>).

<sup>13</sup>C-NMR (100.62 MHz, 298 K, C<sub>6</sub>D<sub>6</sub>): δ 169.2 (-C<sup>2</sup>) 148.7 (-C=CH<sub>2</sub>), 146.6 (C<sub>ipso</sub>), 129.4, 118.8, 115.9, (-C<sub>6</sub>H<sub>5</sub>), [Tol: 137.6(C<sub>ipso</sub>) 129.1, 128.3, 125.4 (-C<sub>6</sub>H<sub>5</sub>), 21.1 (-CH<sub>3</sub>)], 109.8 (CH<sub>2</sub>=), 57.1 (C<sup>1</sup>), 45.7 (CH<sup>4</sup>), 42.6 (CH<sub>2</sub><sup>6</sup>), 26.7 (CH<sub>2</sub><sup>3</sup>), 26.5 (CH<sub>2</sub><sup>5</sup>), 23.7 (CH<sub>3</sub>-C<sup>1</sup>), 20.3 (CH<sub>3</sub>-C=), -6.6 (Al-CH<sub>3</sub>).

**E.A. (%)** C<sub>38</sub>H<sub>60</sub>Al<sub>2</sub>K<sub>2</sub>N<sub>4</sub>O<sub>2</sub>·1tol (829,22): *calcd*: C = 65.18, N = 6.76, H = 8.27. *found*: C = 65.37, N = 6.55, H = 8.19.

**4. Synthesis of [AlPh<sub>3</sub>K({1*S*,4*R*}-ONL<sub>1</sub>)]<sub>x</sub> ((1*S*,4*R*)-**1b**).** To a solution of 0.344 g (1.15 mmol) of ((1*S*,4*R*) and (1*R*,4*S*)-KONL<sub>1</sub>) in 20 mL of toluene, 1.16 mL of AlPh<sub>3</sub> (1M in Bu<sub>2</sub>O, 1.15 mmol) were added in a cold bath of dry ice/isopropanol. The solution was stirred for 30 min and conserved to -21 °C. After one month colorless crystals of compound **1b** were observed. Yield: 82% (0.517 g, 0.471 mmol).

**<sup>1</sup>H-NMR** (400.13 MHz, 298 K, C<sub>6</sub>D<sub>6</sub>): δ 8.07 (m, 6H, *o*-AlC<sub>6</sub>H<sub>5</sub>-H), 7.30 (m, 6H, *m*-AlC<sub>6</sub>H<sub>5</sub>-H), 7.22 (m, 3H, *p*-AlC<sub>6</sub>H<sub>5</sub>-H), 6.95 (m, 2H, *m*-C<sub>6</sub>H<sub>5</sub>-H), 6.63 (m, 1H, *p*-C<sub>6</sub>H<sub>5</sub>-H), 6.48 (m, 2H, *o*-C<sub>6</sub>H<sub>5</sub>-H), 5.09 (br, 1H, =CH<sub>2</sub>), 4.92 (br, 1H, =CH<sub>2</sub>), 3.03 (s, 1H, -NH), 2.98 (m, 1H, -CH<sub>2</sub><sup>3</sup>), 2.91 (m, 1H, -CH<sub>2</sub><sup>3</sup>), 1.91 (m, 1H, CH<sup>4</sup>), 1.77 (m, 1H, CH<sub>2</sub><sup>6</sup>), 1.66 (s, 3H, CH<sub>3</sub>-C=), 1.60 (m, 1H, CH<sub>2</sub><sup>5</sup>), 1.40 (m, 1H, CH<sub>2</sub><sup>5</sup>), 1.21 (m, 1H, CH<sub>2</sub><sup>6</sup>), 1.19 (s, 3H, CH<sub>3</sub>-C<sup>1</sup>).

**<sup>13</sup>C-NMR** (100.62 MHz, 298 K, C<sub>6</sub>D<sub>6</sub>): δ 163.8(-C<sup>2</sup>), 155.0(C<sub>ipso</sub>-AlC<sub>6</sub>H<sub>5</sub>) 148.2(C<sub>ipso</sub>-C<sub>6</sub>H<sub>5</sub>), 146.0 (-C=CH<sub>2</sub>), 138.6 (*o*-AlC<sub>6</sub>H<sub>5</sub>), 129.5 (*m*-C<sub>6</sub>H<sub>5</sub>), 127.5 (*m*-AlC<sub>6</sub>H<sub>5</sub>), 127.3 (*p*-AlC<sub>6</sub>H<sub>5</sub>), 119.6 (*o*-C<sub>6</sub>H<sub>5</sub>), 117.7 (*p*-C<sub>6</sub>H<sub>5</sub>), 110.8 (CH<sub>2</sub>=), 58.2 (C<sup>1</sup>), 42.6 (CH<sup>4</sup>), 37.16 (CH<sub>2</sub><sup>6</sup>), 26.3 (CH<sub>3</sub>-C<sup>1</sup>), 26.0 (CH<sub>2</sub><sup>3</sup>), 25.6 (CH<sub>2</sub><sup>5</sup>), 21.6 (CH<sub>3</sub>-C=).

**E.A. (%)** C<sub>67</sub>H<sub>71</sub>Al<sub>2</sub>K<sub>2</sub>N<sub>4</sub>O<sub>2</sub> (1108.46): *calcd*: C = 73.61, N = 5.05, H = 6.54. *found*: C = 72.71, N = 5.30, H = 6.72

**5. Synthesis of (2).** To a Schlenk containing 0.65g of crystals of compound **1a** (0.88 mmol) in toluene, 250 μL of *p*-methylpropiophenone (1.76 mmol) was added, and the mixture was stirred for 13 h at 80 °C. The solvent was then removed under vacuum to give a yellow oil which was characterized as **2**.

**<sup>1</sup>H-NMR** (400.13 MHz, 298 K, C<sub>6</sub>D<sub>6</sub>): δ 7.73 (m, 1H, *o*-C<sub>6</sub>H<sub>4</sub>-H) 7.25 (m, 2H, *m*-C<sub>6</sub>H<sub>5</sub>-H), 6.89 (m, 1H, *m*-C<sub>6</sub>H<sub>4</sub>-H) 6.83 (m, 2H, *o*-C<sub>6</sub>H<sub>5</sub>-H), 6.78 (m, 1H, *p*-C<sub>6</sub>H<sub>5</sub>-H), 5.26 (m, 0.5H, HC=CO-), 4.88 (br, 1H, =CH<sub>2</sub>), 4.76 (br, 1H, =CH<sub>2</sub>), 3.42 (m, 1H, -CH<sub>2</sub><sup>3</sup>), 3.25 (s, 1H, -NH), 2.31 (m, 1H, -CH<sub>2</sub><sup>3</sup>), 2.31 (m, 1H, CH<sup>4</sup>), 2.00 (s, 1.5H, *p*-CH<sub>3</sub>-C<sub>6</sub>H<sub>4</sub>-), 1.98 (s, 1.5H, CH<sub>3</sub>-CH=CO-), 1.72 (m, 1H, CH<sub>2</sub><sup>5</sup>), 1.71 (m, 2H, CH<sub>2</sub><sup>6</sup>), 1.65 (s, 3H, CH<sub>3</sub>-C=), 1.53 (s, 3H, CH<sub>3</sub>-C<sup>1</sup>), 1.51 (m, 1H, CH<sub>2</sub><sup>5</sup>), -0.49 (br, 7.5H, Al(CH<sub>3</sub>)<sub>2.5</sub>).

**<sup>13</sup>C-NMR** (100.62 MHz, 298 K, C<sub>6</sub>D<sub>6</sub>): δ 201.2 (-C=O), 169.6 (-C<sup>2</sup>) 153.4 (C-OAl(CH<sub>3</sub>)<sub>2</sub>) 148.9 (-C=CH<sub>2</sub>), 146.9 (-NH-C<sub>ipso</sub>), 143.46 (-C<sub>ipso</sub>-C-OAl), 140.0 (-C<sub>ipso</sub>-C=O), 137.9 (Me-C<sub>ipso</sub>-enolate), 129.3 (*m*-C<sub>6</sub>H<sub>4</sub>), 129.3 (*m*-C<sub>6</sub>H<sub>5</sub>), 125.7 (*o*-C<sub>6</sub>H<sub>4</sub>), 116.4 (*o*-C<sub>6</sub>H<sub>5</sub>), 116.3 (*p*-C<sub>6</sub>H<sub>5</sub>), 110.2 (CH<sub>2</sub>=), 98.0 (HC=CO-), 57.8 (C<sup>1</sup>), 45.9 (CH<sup>4</sup>),

42.36 ( $\text{CH}_2^6$ ), 27.0 ( $\text{CH}_2^5$ ), 26.8 ( $\text{CH}_2^3$ ), 24.2 ( $\text{CH}_3\text{-C}^1$ ), 21.4 ( $p\text{-CH}_3$ ), 20.4 ( $\text{CH}_3\text{-C=}$ ), 12.5 ( $\text{CH}_3\text{-enolate}$ ), -8.4 ( $\text{Al}(\text{CH}_3)_3$ ) -8.7 ( $\text{Al}(\text{CH}_3)_2$ ).

**E.A. (%)**  $\text{C}_{47}\text{H}_{68}\text{Al}_2\text{K}_2\text{N}_4\text{O}_3$  (868.42): *calcd*: C = 64.94, N = 6.45, H = 7.89. *found*: C = 65.05, N = 6.31, H = 7.35

**6. Synthesis of (3).** To a NMR tube containing 0.02g of compound **1b** (0.036 mmol) in toluene, 10.70  $\mu\text{L}$  of *p*-methylpropiophenone (0.072 mmol) was added, and the mixture was heated for 3 h at 80 °C. The solution was conserved at RT. After one day colorless crystals of compound **3** were observed. Yield: 89% (0.017 g, 0.038 mmol).

**7. Synthesis of 2-methyl-1-(4-methylphenyl)-1-propanone (4).** To a solution of aluminum enolate **2** or **3**, MeI was added at 90 °C for 10 min. The solution was filtered and the product was purified by chromatography using a hexane-dichloromethane mixture as eluent.

**$^1\text{H}$  NMR** (400.13 MHz, 298 K,  $\text{CDCl}_3$ )  $\delta$  (ppm): 7.87 (d, 2H, *o*- $\text{C}_6\text{H}_4\text{-H}$ ), 7.27 (d, 2H, *m*- $\text{C}_6\text{H}_4\text{-H}$ ), 3.39 (sex, 1H,  $^\alpha\text{CH}$ ), 2.42 (s, 3H, *p*- $\text{CH}_3$ ), 1.83 (sep, 1H,  $^\beta\text{CH}_2$ ), 1.49 (sep, 1H,  $^\beta\text{CH}_2$ ), 1.19 (d, 3H,  $^\beta\text{CH}_3$ ), 0.92 (s, 3H,  $^\gamma\text{CH}_3$ ).

## II. NMR Spectra

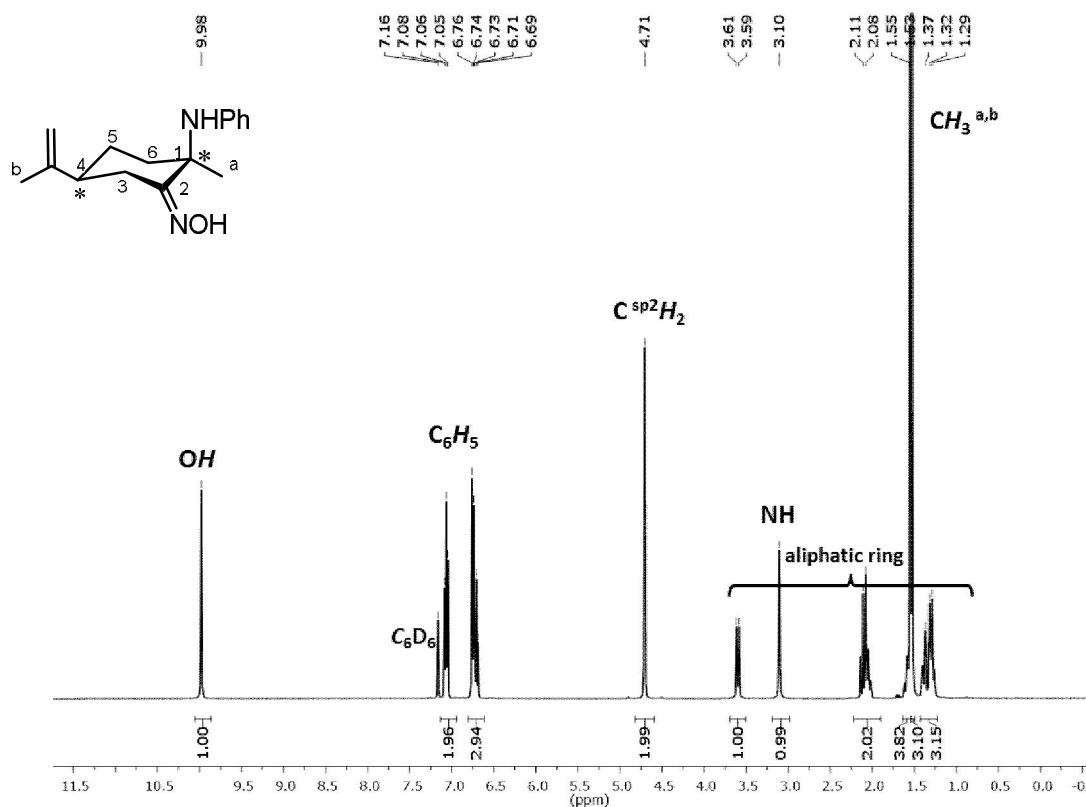

Figure S1. <sup>1</sup>H NMR (298K, C<sub>6</sub>D<sub>6</sub>, 400.13 MHz) spectrum for crystals of (1*R*,4*S*)-HONL<sub>1</sub>.

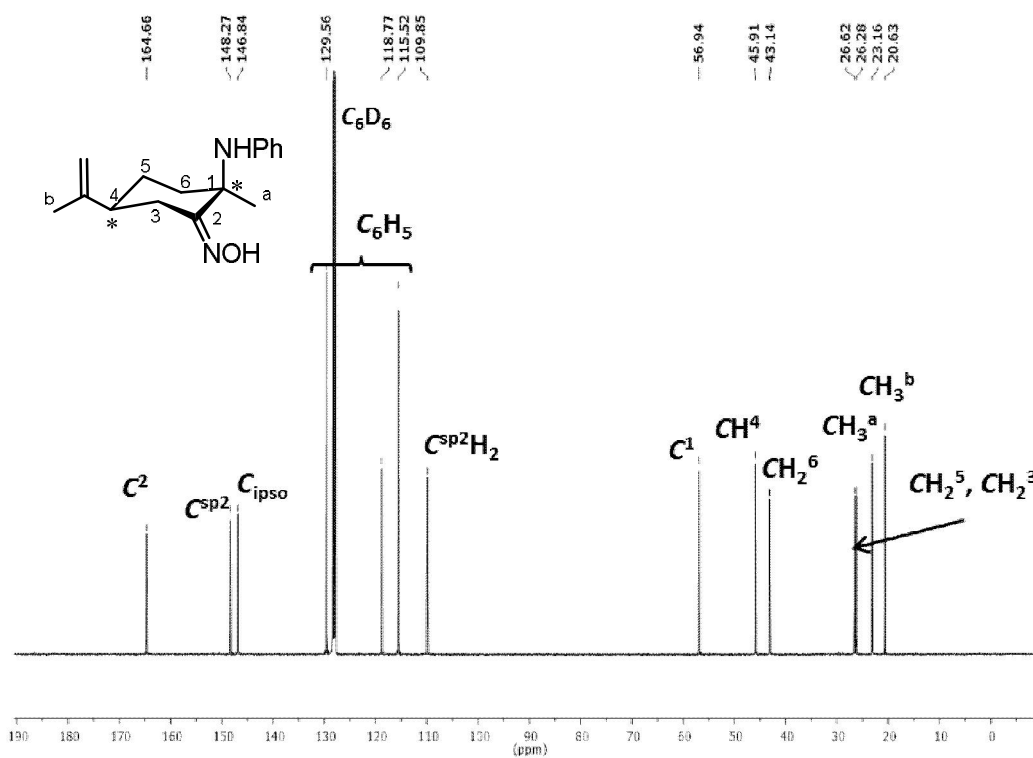

Figure S2. <sup>13</sup>C NMR (298K, C<sub>6</sub>D<sub>6</sub>, 100.62 MHz) spectrum for crystals of (1*R*,4*S*)-HONL<sub>1</sub>.

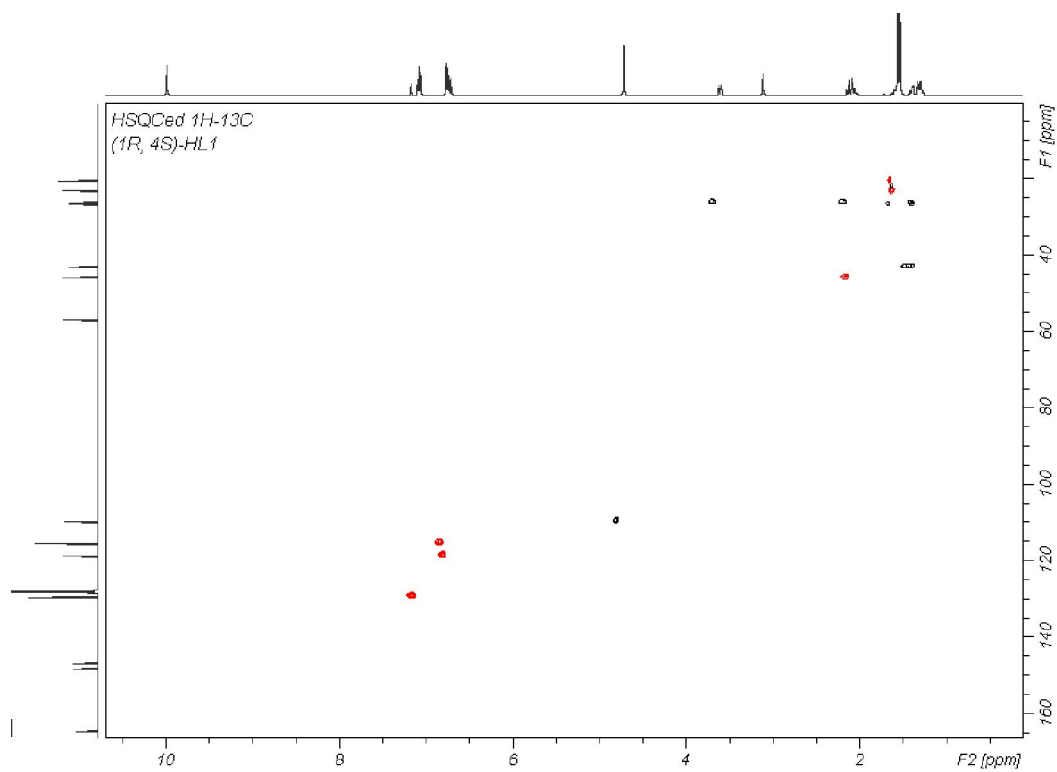

**Figure S3.**  $^1\text{H}$   $^{13}\text{C}$  HSQC-ed NMR (298K,  $\text{C}_6\text{D}_6$ ) spectrum for crystals of **(1R,4S)-HONL<sub>1</sub>**. Note: Red signals correspond to CH and  $\text{CH}_3$  groups. Black signals correspond to  $\text{CH}_2$  groups

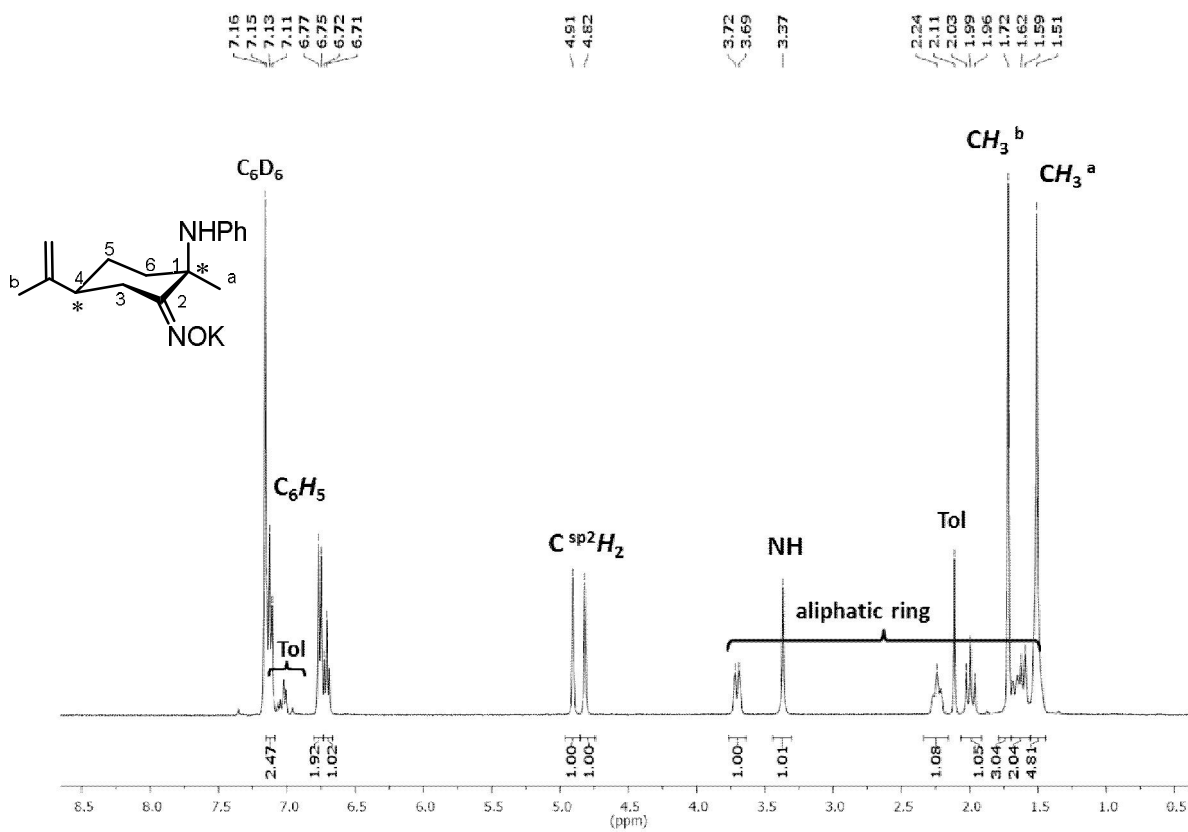

**Figure S4.**  $^1\text{H}$  NMR (298K,  $\text{C}_6\text{D}_6$ , 400.13 MHz) spectrum of **(1S,4R)-KONL<sub>1</sub>**.



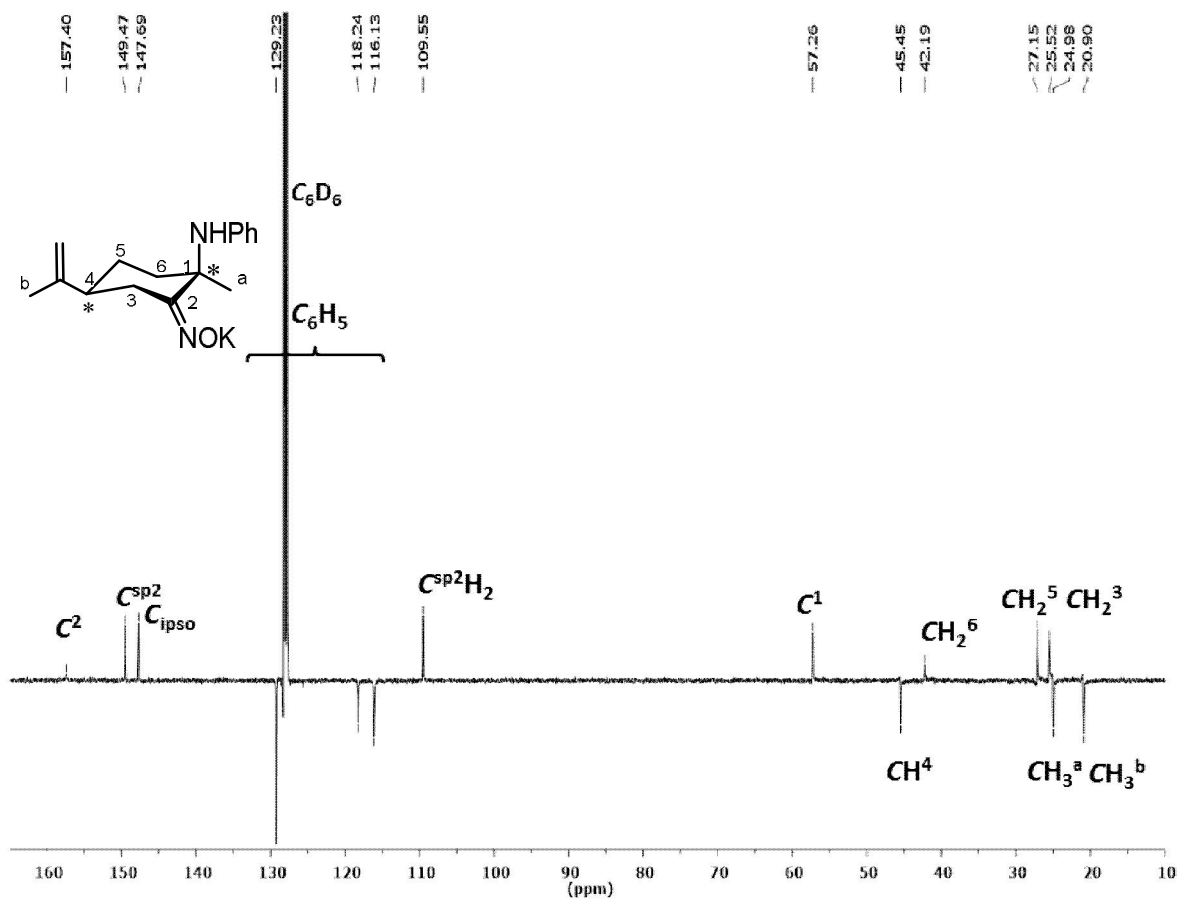

Figure S5. <sup>13</sup>C NMR (298K, C<sub>6</sub>D<sub>6</sub>, 100.62 MHz) spectrum for crystals of (1*S*,4*R*)-KONL<sub>1</sub>.

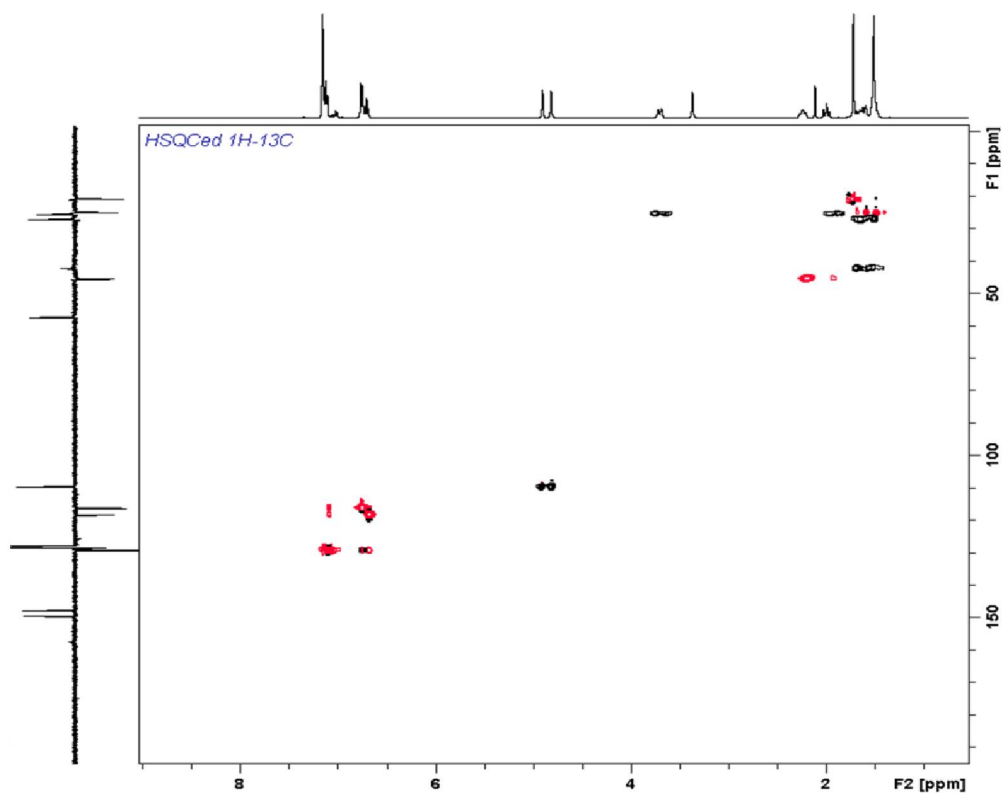

Figure S6. <sup>1</sup>H-<sup>13</sup>C HSQC-ed NMR (298K, C<sub>6</sub>D<sub>6</sub>) spectrum of (1*S*,4*R*)-KONL<sub>1</sub>. Note: Red signals correspond to CH and CH<sub>3</sub> groups. Black signals correspond to CH<sub>2</sub> groups.

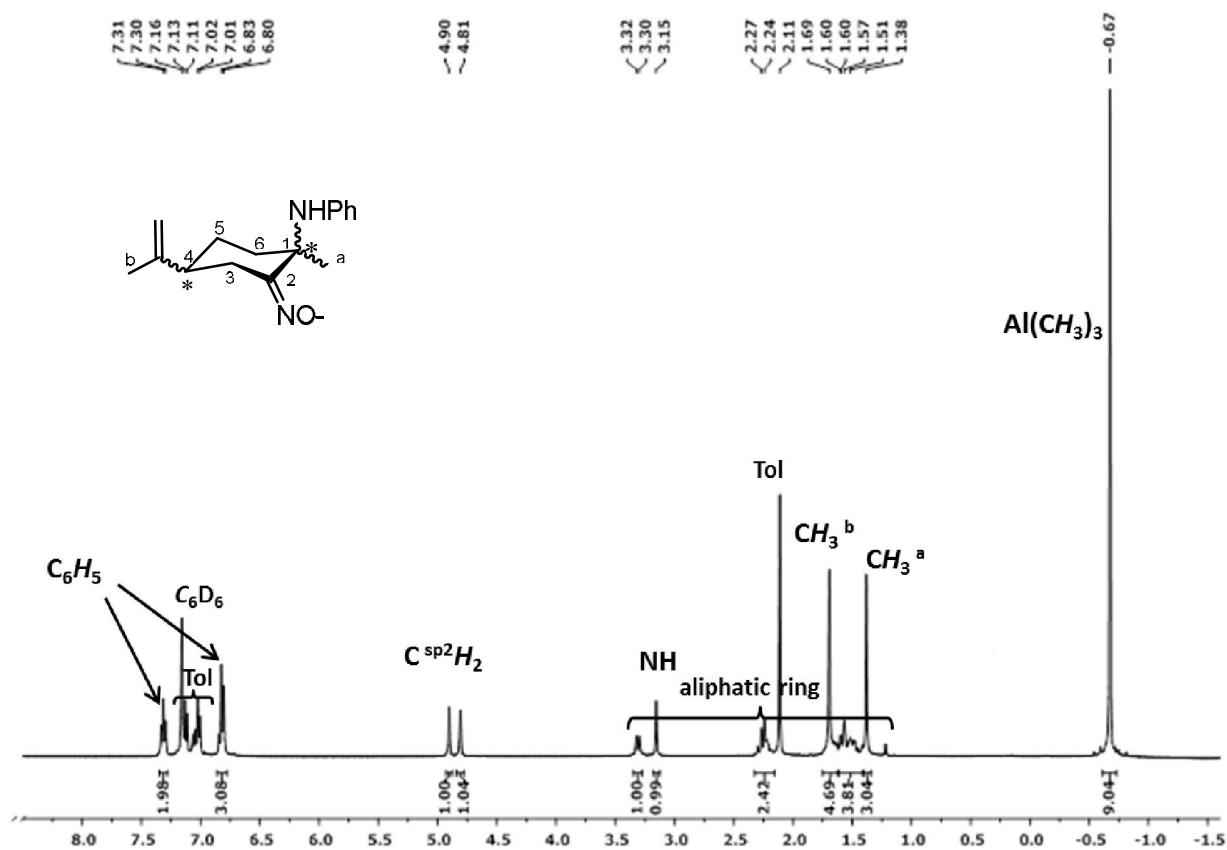

Figure S7.  $^1\text{H}$  NMR (298K,  $\text{C}_6\text{D}_6$ , 400.13 MHz) spectrum for crystals of (1*S*,4*R*)-1a and (1*R*,4*S*)-1a.

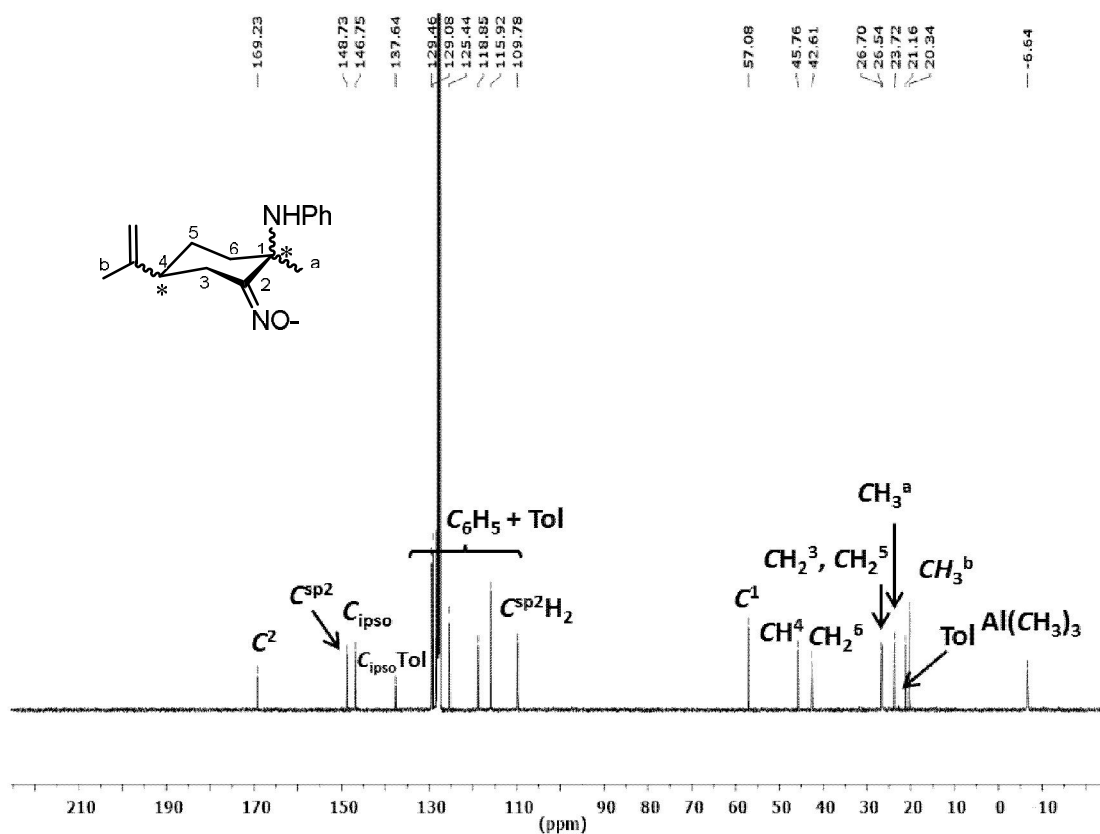

Figure S8.  $^{13}\text{C}$  NMR (298K,  $\text{C}_6\text{D}_6$ , 100.62 MHz) spectrum for crystals of (1*S*,4*R*)-1a and (1*R*,4*S*)-1a.

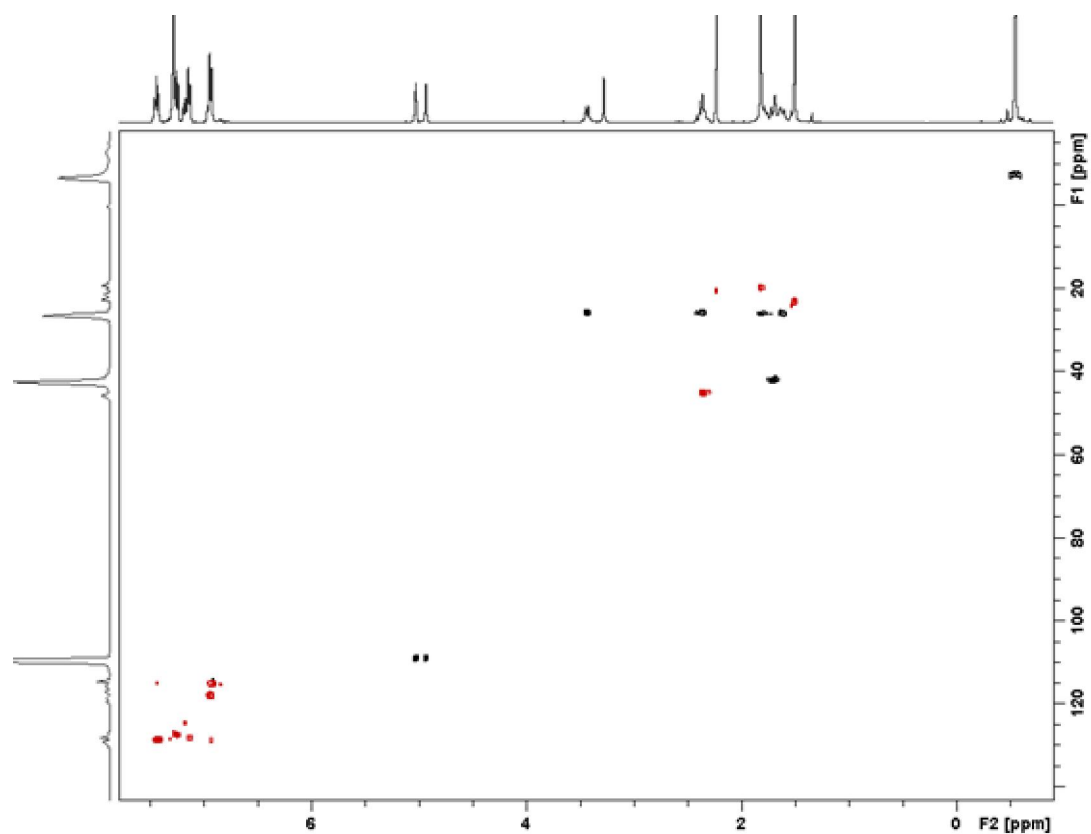

**Figure S9.**  $^1\text{H}$ - $^{13}\text{C}$  HSQC-*ed* NMR (298K,  $\text{C}_6\text{D}_6$ ) spectrum for crystals of **(1*S*,4*R*)-1a** and **(1*R*,4*S*)-1a**. Note: Red signals correspond to CH and  $\text{CH}_3$  groups. Black signals correspond to  $\text{CH}_2$  groups.

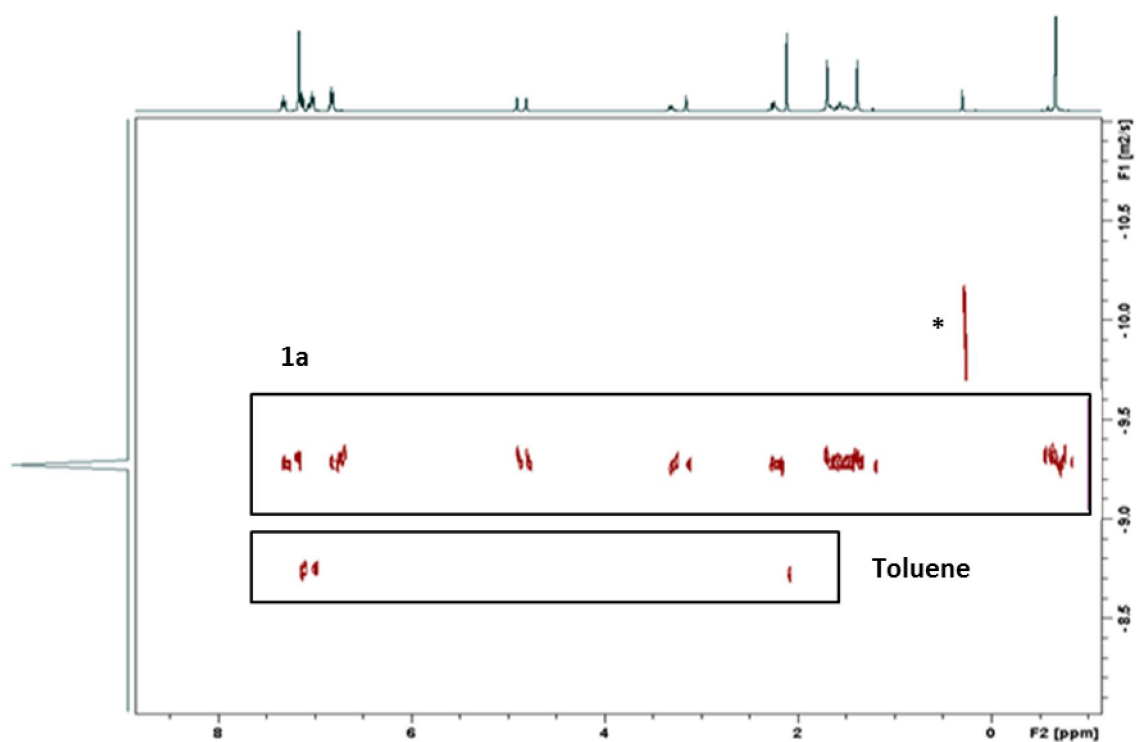

**Figure S10.2D**  $^1\text{H}$ -DOSY NMR (298K,  $\text{C}_6\text{D}_6$ , 400.13 MHz) spectrum for crystals of **(1*S*,4*R*)-1a** and **(1*R*,4*S*)-1a**. \*Represents grease

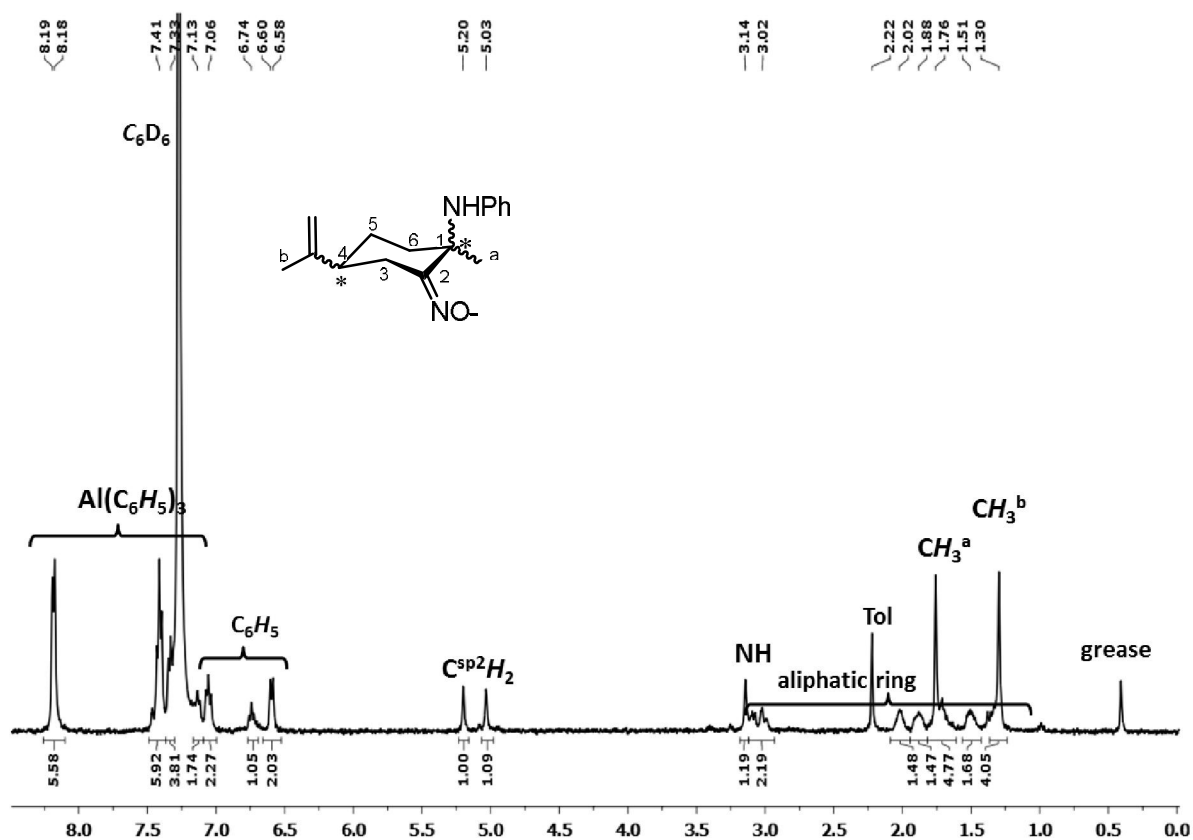

Figure S11.  $^1\text{H}$  NMR (298K,  $\text{C}_6\text{D}_6$ , 400.13 MHz) spectrum for crystals of **(1S,4R)-1b**.

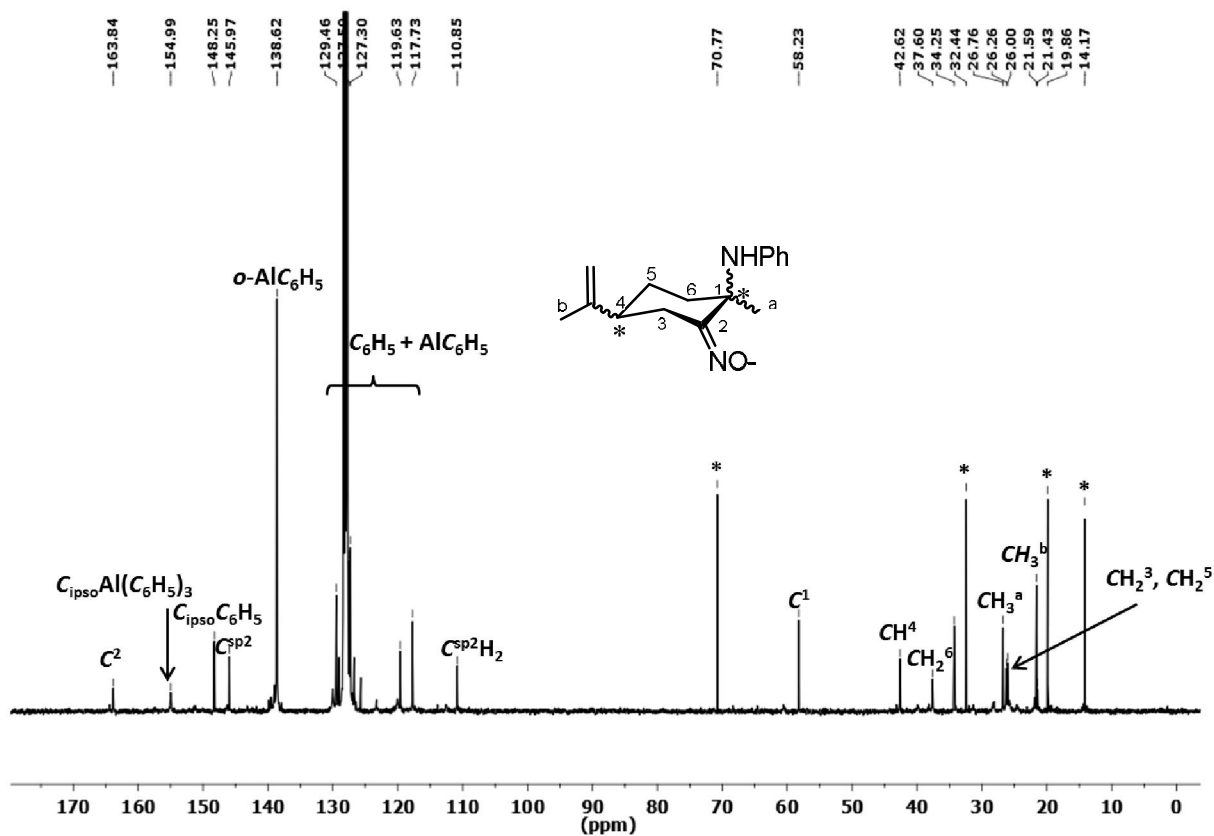

Figure S12.  $^{13}\text{C}$  NMR (298K,  $\text{C}_6\text{D}_6$ , 100.62 MHz) spectrum for the reaction mixture of **(1S,4R)-1b**.<sup>\*</sup> Represents  $\text{Bu}_2\text{O}$  as solvent of  $\text{AlPh}_3$ .

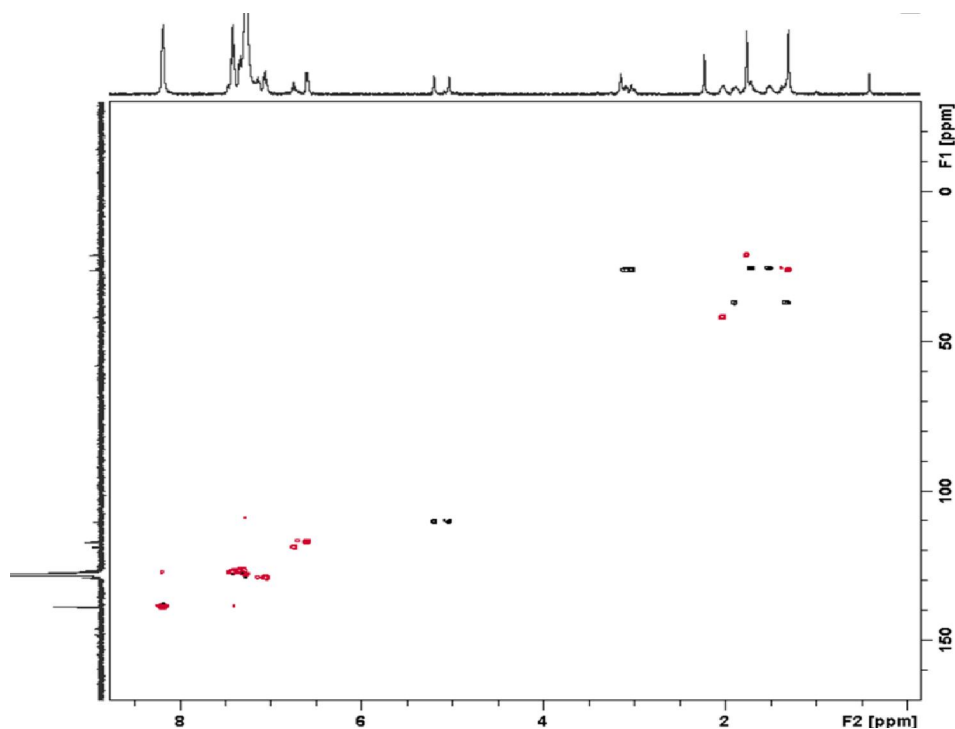

**Figure S13.**  $^1\text{H}$ - $^{13}\text{C}$  HSQC-ed NMR (298K,  $\text{C}_6\text{D}_6$ ) spectrum for crystals of **(1S,4R)-1b**. Note: Red signals correspond to CH and  $\text{CH}_3$  groups. Black signals correspond to  $\text{CH}_2$  groups.

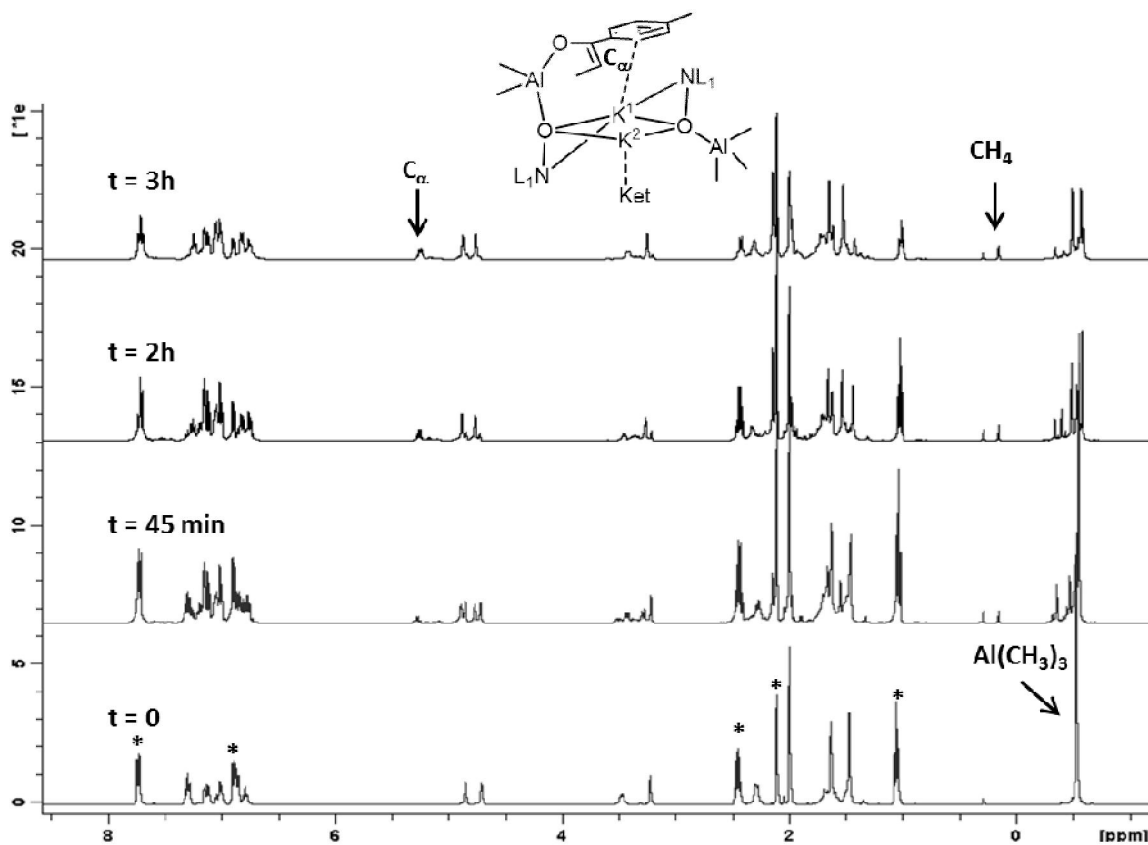

**Figure S14.**  $^1\text{H}$  NMR (298K,  $\text{C}_6\text{D}_6$ , 400.13 MHz) monitoring of **(1S,4R)-1a** and *p*-methylpropiophenone reaction. \* Represents *p*-methylpropiophenone. The formation of **2** and  $\text{CH}_4$  is observed from  $t = 30$  min.

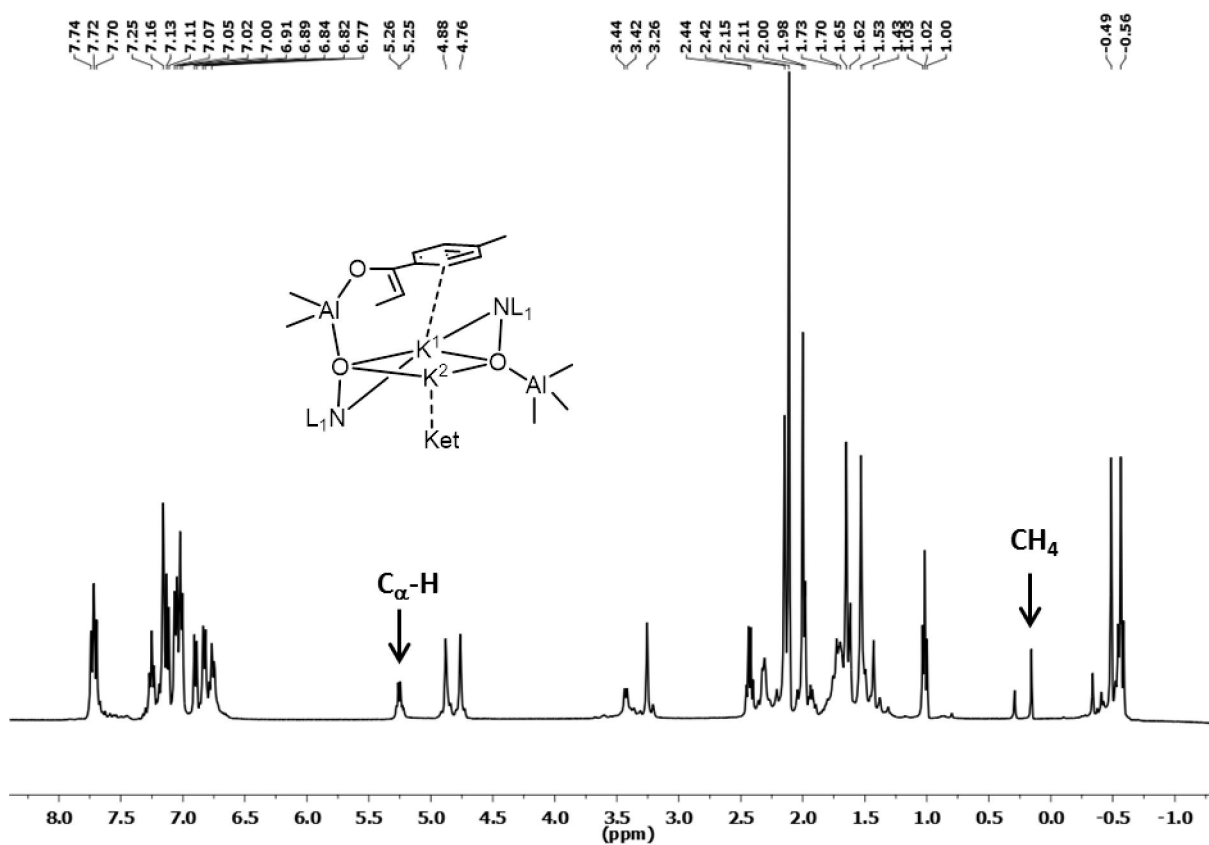

**Figure S15.** <sup>1</sup>H NMR (298K, C<sub>6</sub>D<sub>6</sub>, 400.13 MHz) spectrum for the *in situ* reaction of **1a** with 2 equivalents of 4-methylpropiophenone in C<sub>6</sub>D<sub>6</sub>.

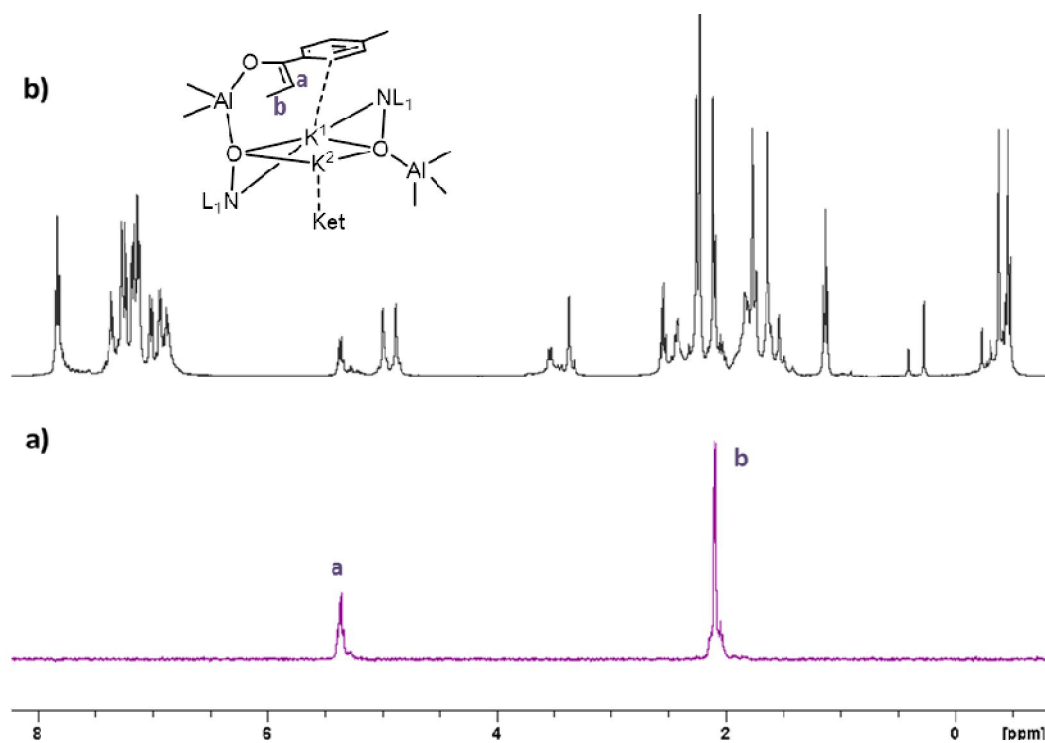

**Figure S16.** a) <sup>1</sup>H TOCSY NMR, b) <sup>1</sup>H NMR (298K, C<sub>6</sub>D<sub>6</sub>, 400.13 MHz) spectra of **2**. The TOCSY experiment allows to identify the resonance for C<sup>b</sup>.

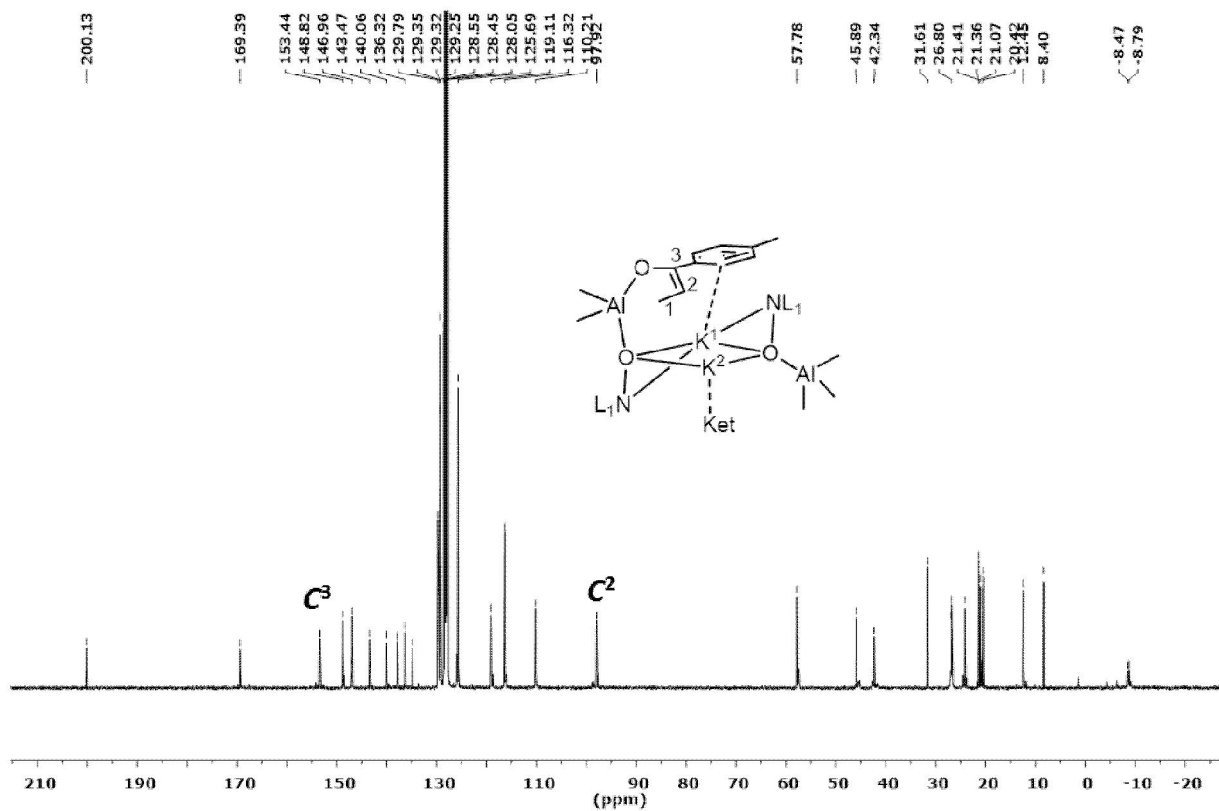

Figure S17.  $^{13}\text{C}$  NMR (298K,  $\text{C}_6\text{D}_6$ , 100.62 MHz) spectra of **2** in  $\text{C}_6\text{D}_6$ .

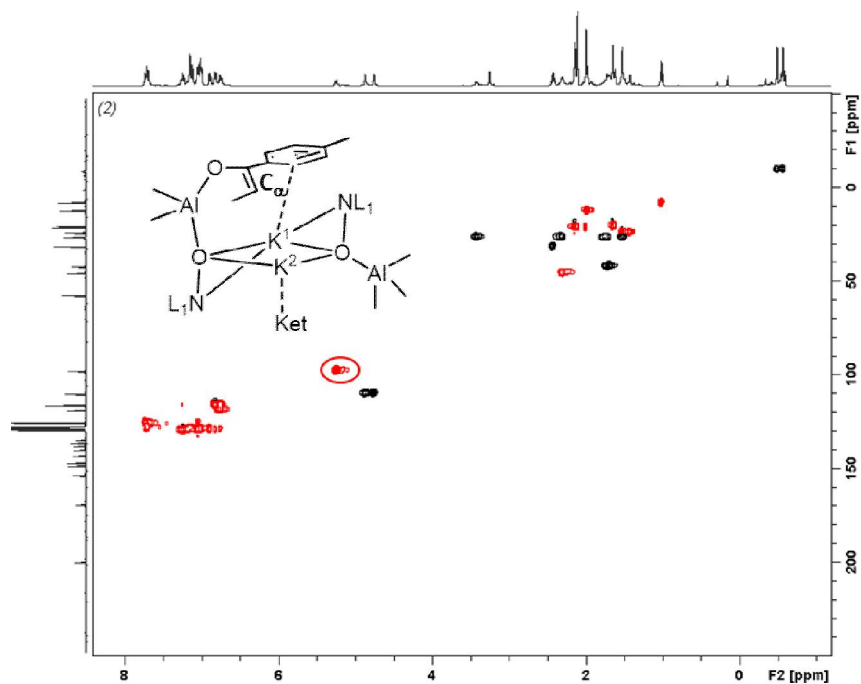

Figure S18.  $^1\text{H}$ - $^{13}\text{C}$  HSQC-ed NMR (298K,  $\text{C}_6\text{D}_6$ ) spectrum of **2** in  $\text{C}_6\text{D}_6$ . **Note:** Red signals correspond to CH and  $\text{CH}_3$  groups. Black signals correspond to  $\text{CH}_2$  groups. The  $\text{C}_\alpha$  signal corresponds to CH signal (red).

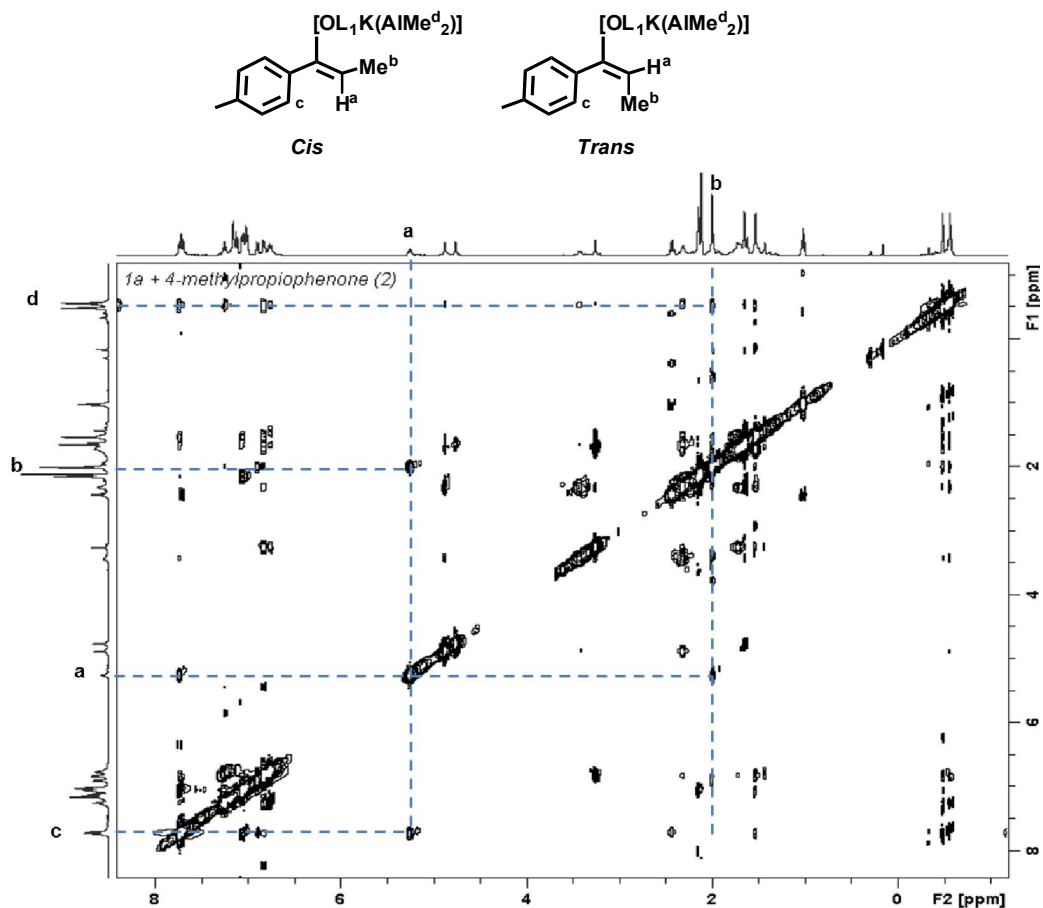

Figure S19.  $^1\text{H}$ - $^1\text{H}$  NOESY NMR (298K,  $\text{C}_6\text{D}_6$ , 400.13 MHz) spectrum of **2**. The *cis* isomer is the one observed.

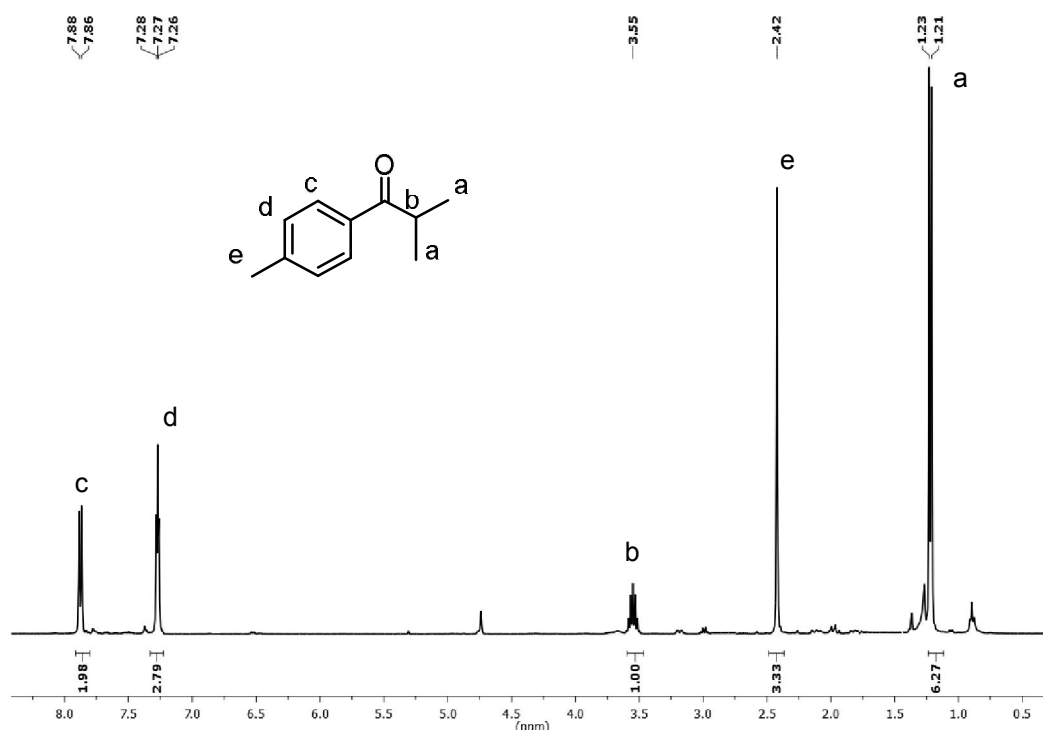

Figure S20.  $^1\text{H}$  NMR (298K,  $\text{CDCl}_3$ , 400.13 MHz) spectrum of **4**.



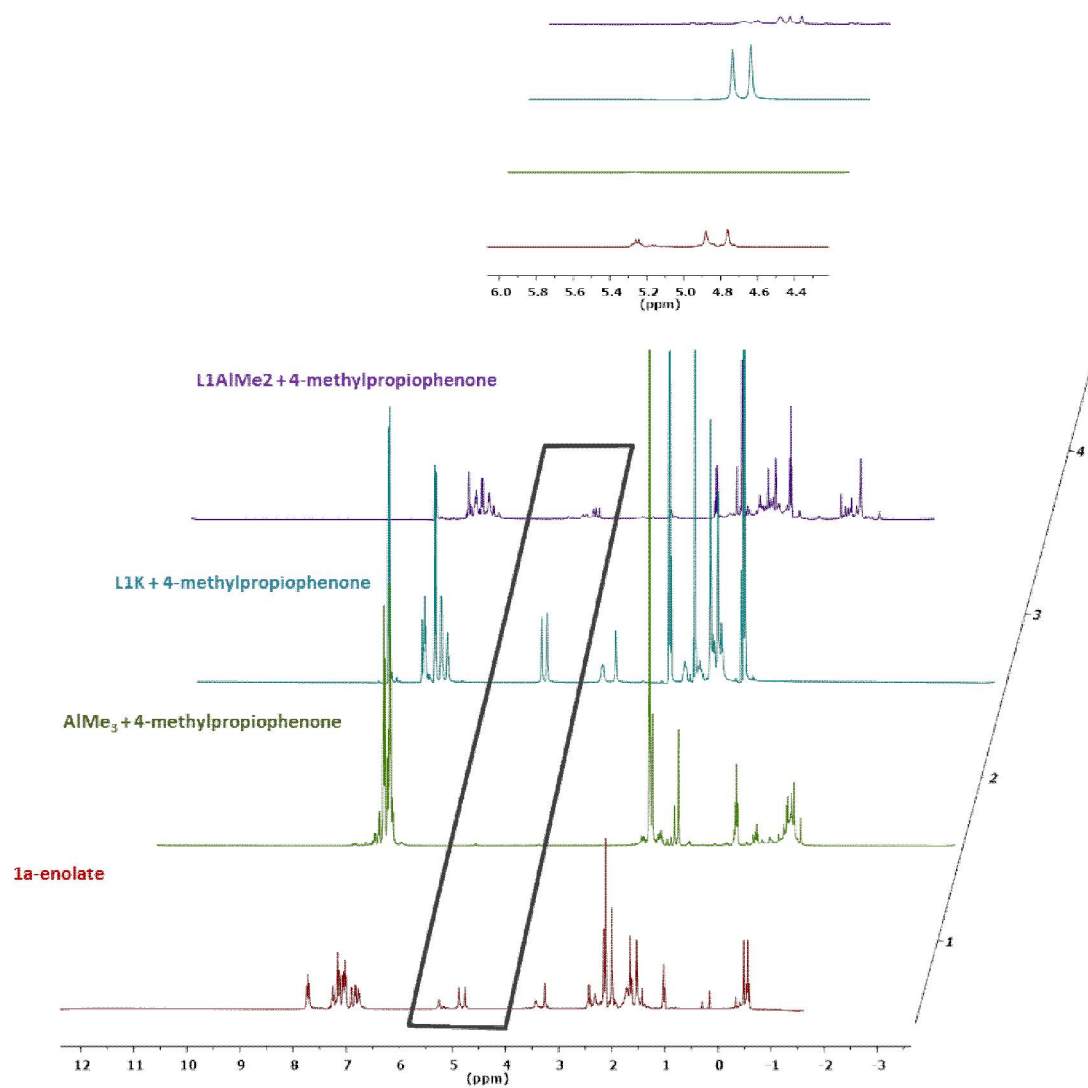

**Figure S21.**  $^1\text{H}$  NMR (298K,  $\text{C}_6\text{D}_6$ , 400.13 MHz) spectrum of (from bottom to top): 1a-enolate, reactions of 4-methylpropiophenone vs  $\text{AlMe}_3$ , potassium oximate and aluminum oximate derivatives. As shown, the enolate is not formed when the homometallic species are used.

### III. Diffusion-Ordered NMR Spectroscopy (DOSY) experiments

In Diffusion-Ordered NMR Spectroscopy (DOSY) experiments, a series of pulsed field gradient (PFG) stimulated echo experiments is performed and the results allow to generate a two dimensional spectrum where signals are dispersed depending on their diffusion coefficients. Since the diffusion coefficients ( $D$ ) are related to the molecular size and shape of the molecules, a number of empirical methods for relating  $D$  to the molecular weight have been proposed based mainly in the dependence with the hydrodynamic radius of the molecule given by the Stokes-Einstein equation  $D = kT/(6\pi\eta r_H)$ , where  $k$  is the Boltzman constant,  $T$  is the temperature,  $\eta$  is the viscosity, and  $r_H$  is the hydrodynamic radius.<sup>[2]</sup> For small organometallic molecules the Li and Williard described a methodology that have successfully used by several groups.<sup>[3]</sup> In this approach, from the experimental data a calibration curve with at least three internal references to one NMR sample is generated, and the MW of the problem molecule (analyte) is calculated by interpolation.<sup>[4]</sup> However, recently Prof. Dietmar Stalke has reported a new methodology that overcomes the need of internal references by using external references to estimate the MW of the new species.<sup>[5]</sup>

Following this method we have estimated the MW of compounds **(1S,4R)-1a**, **(1S,4R)-1b** and **2** in solution. In all our samples TPhN was used as reference molecule. All samples were prepared in  $C_6D_6$  by adding of 1,2,3,4-tetraphenylnaphthlene-TPhN ( $432.19 \text{ g mol}^{-1}$ ) and the analyte (each 15mM,) in an equimolar ratio. NMR experiments were carried out on a Bruker AV400 spectrometer equipped with a probe PABBO BB-1H/D Z-GRD. The diffusion time was  $\Delta = 0.1 \text{ s}$ . The duration of the magnetic eld pulse gradients  $\delta/2$  was adjusted for each molecule in a range of 1000–1600 ms. The delay for gradient recovery was 0.2 ms and the eddy current delay 5 ms. For each DOSY-NMR experiment, a series of 16 spectra on 32 K data points were collected. The pulse gradients ( $g$ ) were incremented from 2 to 98% of the maximum gradient strength in a linear ramp with a total experiment time of 45 min. After Fourier transformation and baseline correction, the diffusion dimension was processed with the Topspin 2.0 software. Diffusion coefficients were calculated by Gaussian fits with the T1/T2 software of Topspin.

The values obtained for the diffusion coefficients were normalized in relation to the external reference using the equation (1)

$$\log D_{x,norm} = \log D_{ref,fix} - \log D_{ref} + \log D_x \quad (1)$$

The MW values were calculated using equation (2), where  $K$  and  $\alpha$  parameters depending on the compound geometry.

$$MW_{det} = 10^{\left(\frac{\log D_{x,norm} - \log K}{\alpha}\right)} \quad (2)$$

For **(1*S*,4*R*)-1a** and **(1*S*,4*R*)-1b**, the geometry considered was ECC<sub>DSE</sub> based on its solid state structure (figure S-17). For compound **2** parameters corresponding to DSE and CS geometry were used respectively since a better agreement was achieved with the experimental data.

**Table S1** <sup>a</sup> ECC<sub>DSE</sub><sup>TOL</sup> was used to calculate the MW. <sup>b</sup>ECC<sub>CS</sub><sup>TOL</sup> was used to calculate the MW.

| Analyte                                      | MW [g mol <sup>-1</sup> ] | MW <sub>det</sub> [g mol <sup>-1</sup> ] | ΔMW [%] |
|----------------------------------------------|---------------------------|------------------------------------------|---------|
| <b>(1<i>S</i>,4<i>R</i>)-1a</b> <sup>a</sup> | 737.078                   | 680.64                                   | 7       |
| <b>(1<i>S</i>,4<i>R</i>)-1b</b> <sup>a</sup> | 1108.46                   | 1075.58                                  | -9      |
| <b>2</b> <sup>b</sup>                        | 1000.48                   | 1076.23                                  | -8      |

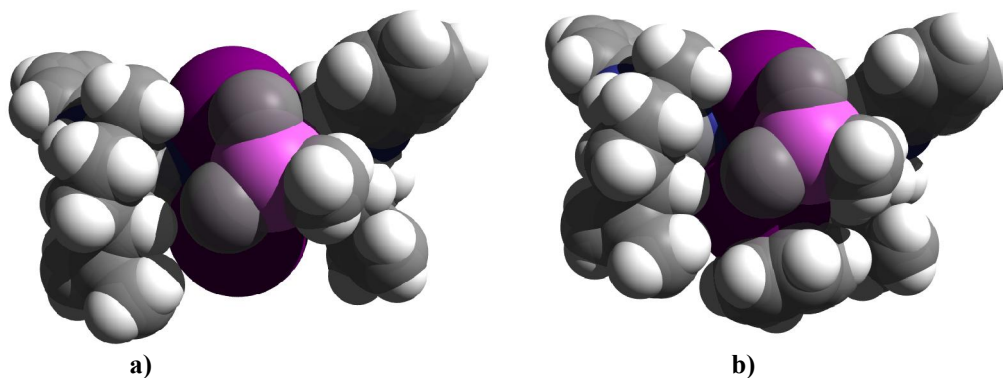

**Figure S22.** a) Spacefill representation for **(1*S*,4*R*)-1a** molecular structure without the toluene molecules coordinated. b) Spacefill representation for **(1*S*,4*R*)-1a** molecular structure with one toluene molecule coordinated to the potassium atom.

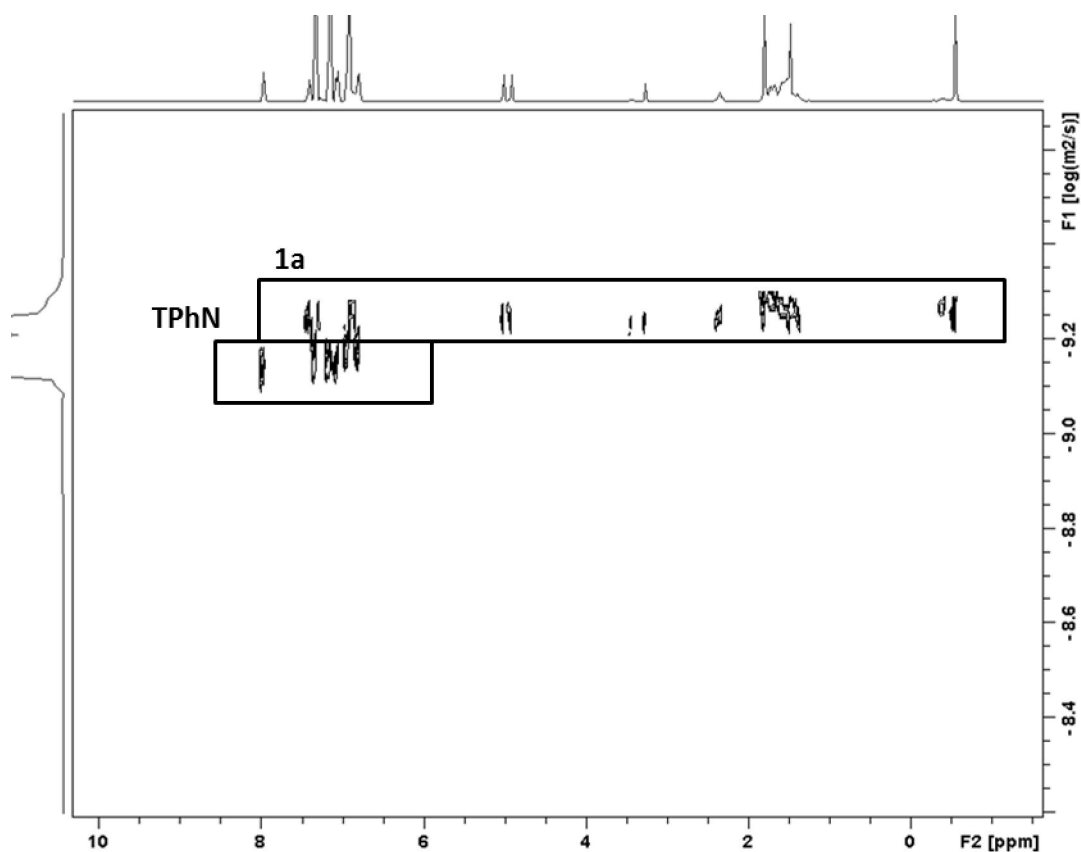

Figure S23. 2D <sup>1</sup>H DOSY NMR experiment of the mixture of TPhN and **1a** in C<sub>6</sub>D<sub>6</sub>.

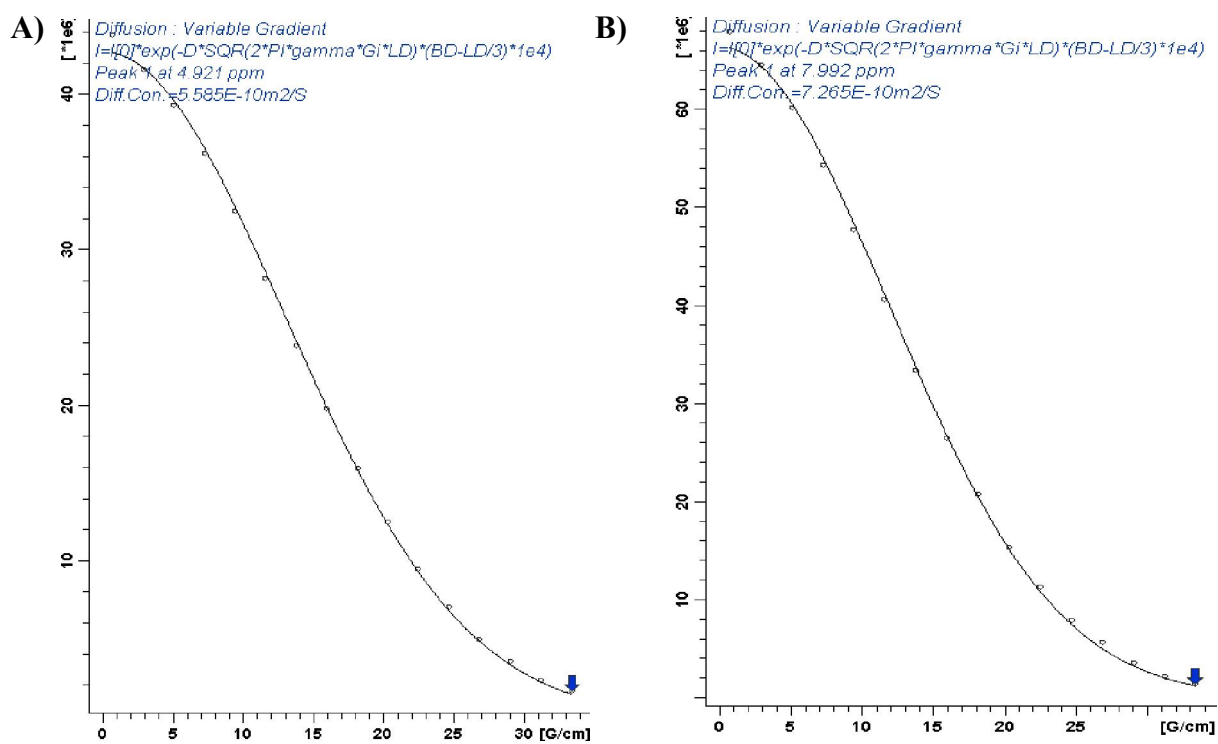

Figure S24. A) Gaussian fits of **1a** in C<sub>6</sub>D<sub>6</sub>. B) Gaussian fits of TPhN in C<sub>6</sub>D<sub>6</sub>.

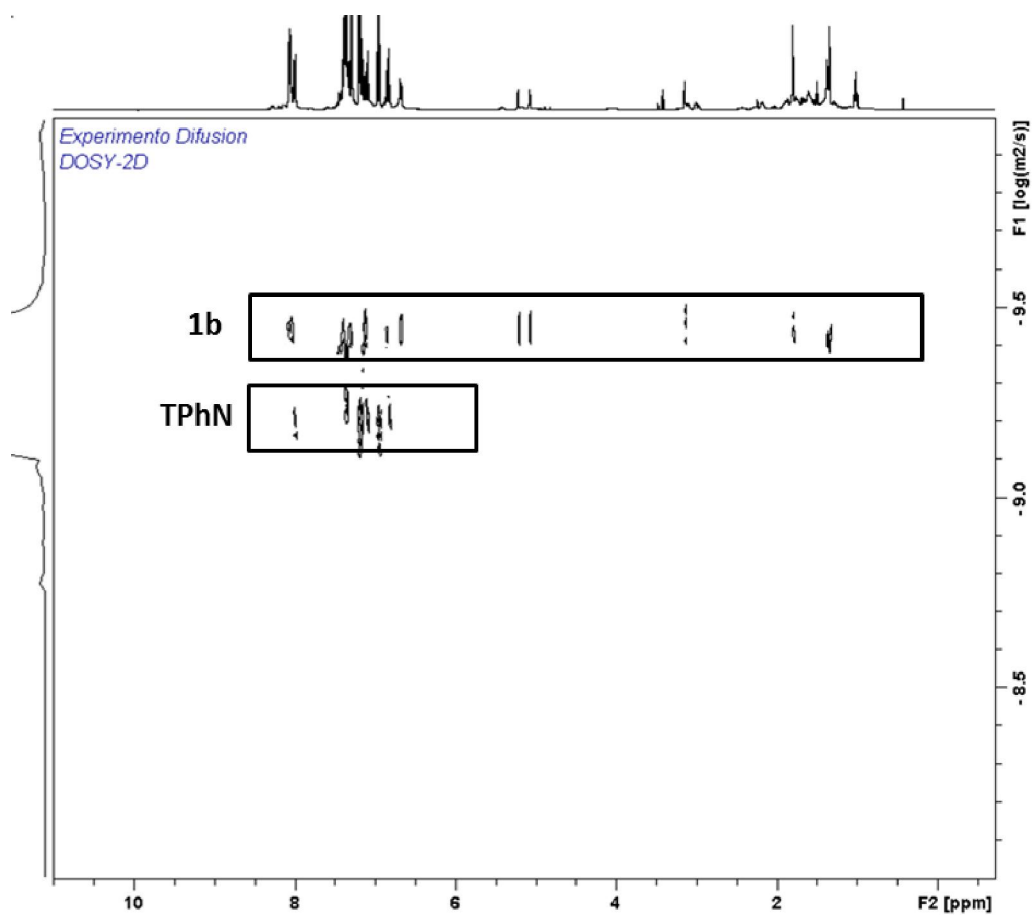

Figure S25. 2D  $^1\text{H}$ -DOSY NMR experiment of the mixture of TPhN and **1b** in  $\text{C}_6\text{D}_6$ .

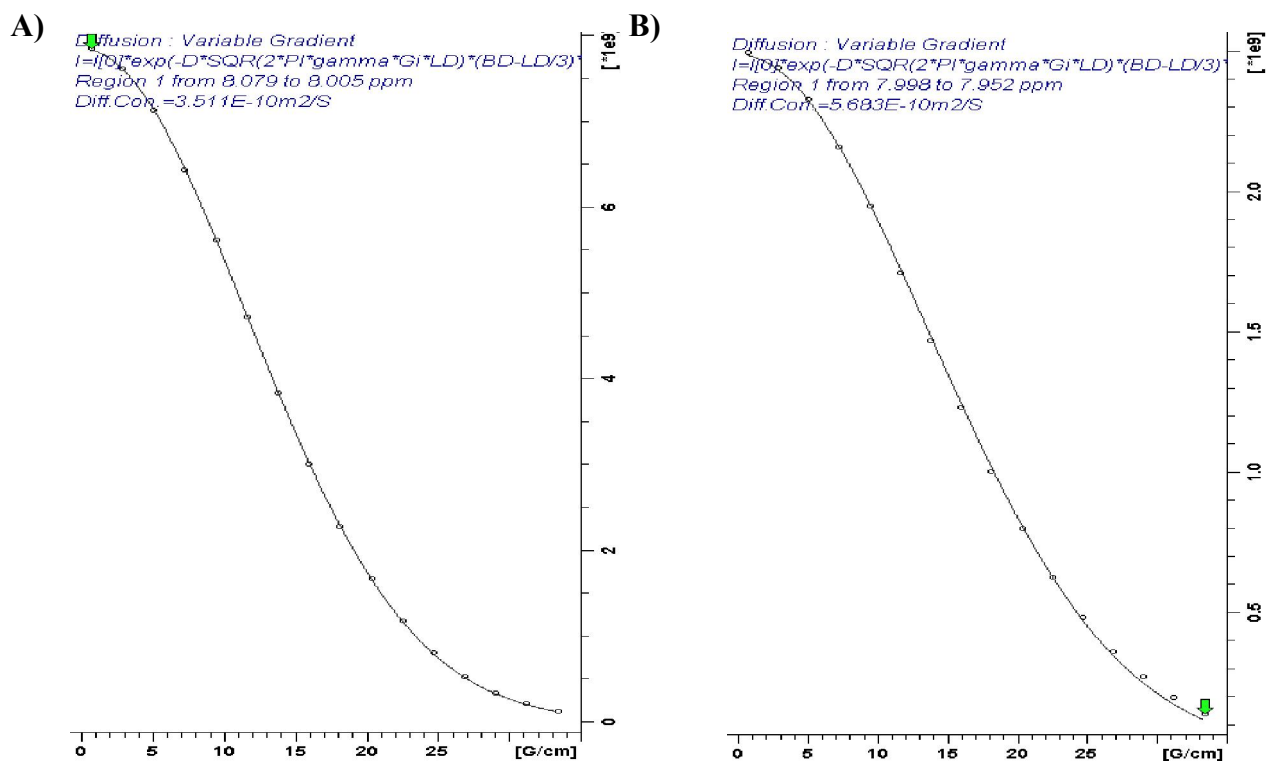

Figure S26. **A)** Gaussian fits of **1b** in  $\text{C}_6\text{D}_6$ . **B)** Gaussian fits of TPhN in  $\text{C}_6\text{D}_6$ .

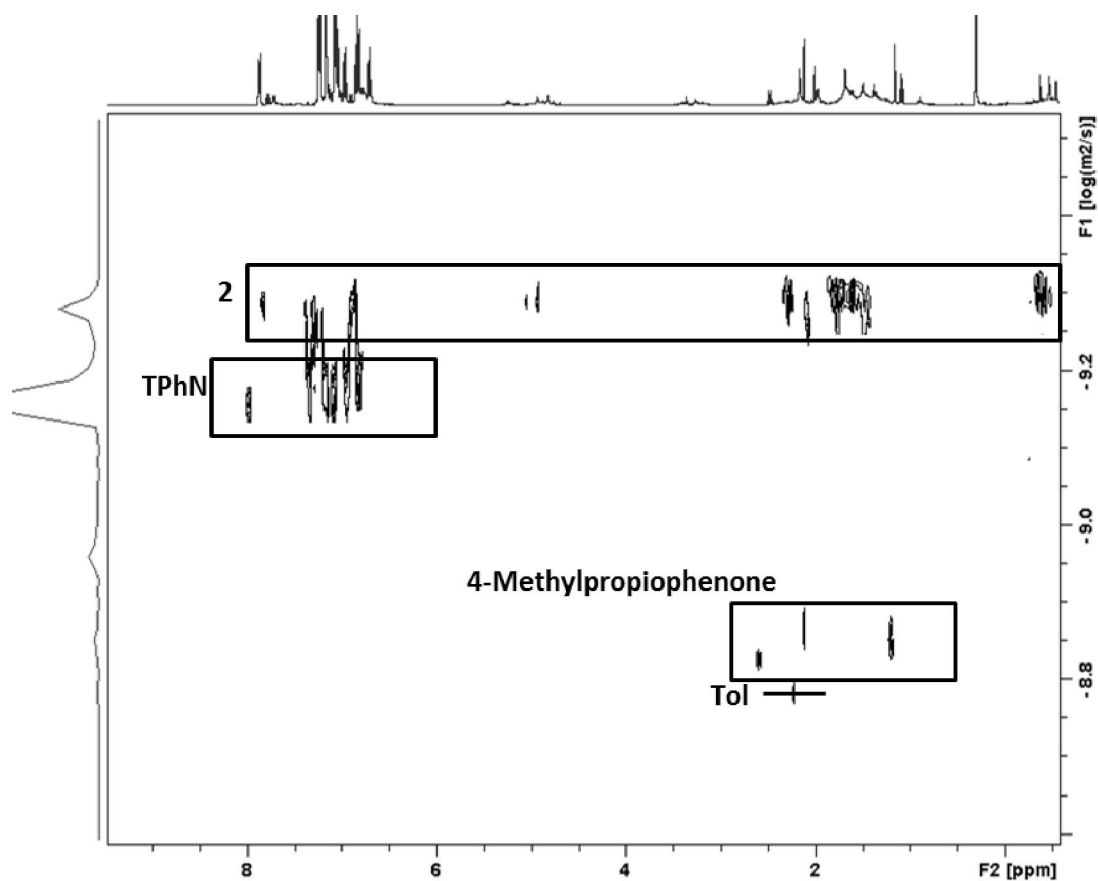

Figure S27. 2D  $^1\text{H}$ -DOSY NMR experiment of the mixture of TPhN and **2** in  $\text{C}_6\text{D}_6$ .

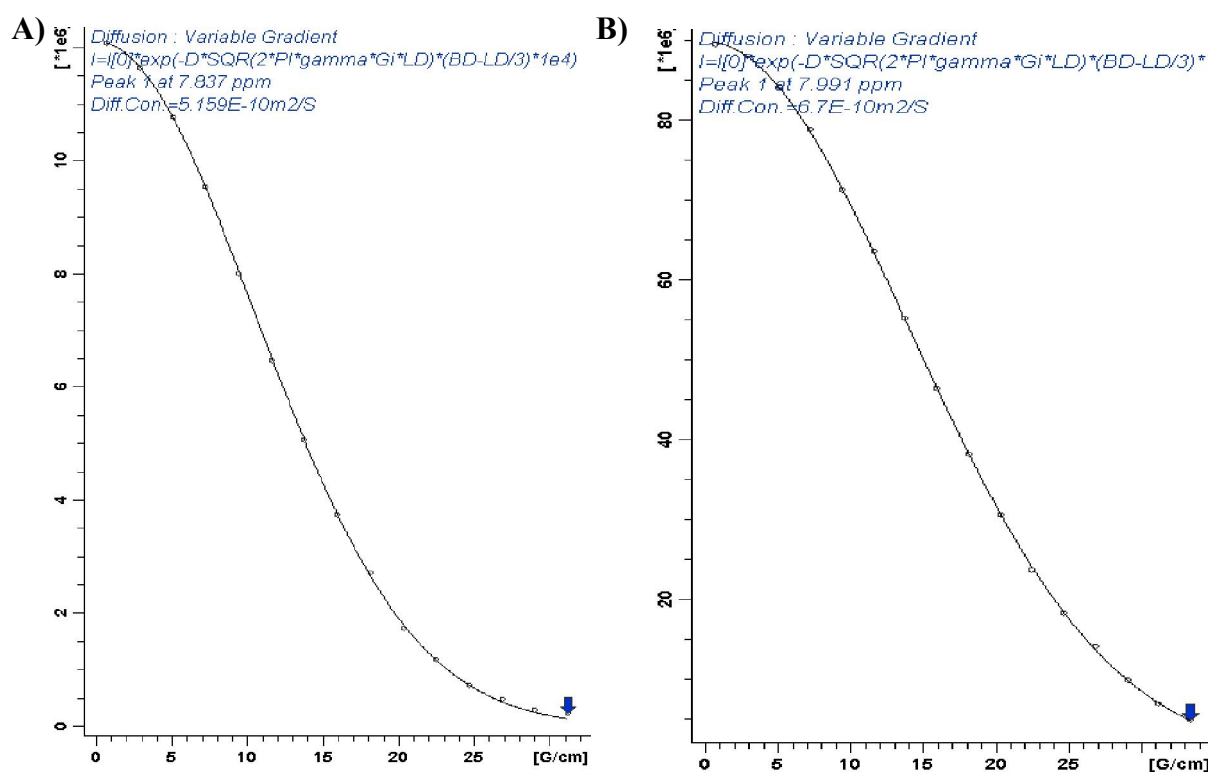

Figure S28. A) Gaussian fits of **2** in  $\text{C}_6\text{D}_6$ . B) Gaussian fits of TPhN in  $\text{C}_6\text{D}_6$ .

#### IV. Single-Crystal X-ray Structure Determination of Compounds (1*S*,4*R*)-1a·C<sub>6</sub>D<sub>6</sub>, (1*R*,4*S*)-1a·C<sub>6</sub>D<sub>6</sub>, (1*S*,4*R*)-1c·0.5(C<sub>7</sub>H<sub>8</sub>·C<sub>6</sub>D<sub>6</sub>) and 3 C<sub>6</sub>D<sub>6</sub>.

Details of the X-ray experiment, data reduction, and final structure refinement calculations are summarized in Table S-2. Suitable single crystals of (1*S*,4*R*)-1a·C<sub>6</sub>D<sub>6</sub>, (1*R*,4*S*)-1a·C<sub>6</sub>D<sub>6</sub>, (1*S*,4*R*)-1c·0.5(C<sub>7</sub>H<sub>8</sub>·C<sub>6</sub>D<sub>6</sub>) and 3 C<sub>6</sub>D<sub>6</sub> for the X-ray diffraction study were selected. Data collection was performed at 200(2) K, with the crystals covered with perfluorinated ether oil. The crystals were mounted on a Bruker-Nonius Kappa CCD single crystal diffractometer equipped with a graphite-monochromated Mo-K $\alpha$  radiation ( $\lambda = 0.71073 \text{ \AA}$ ). Multiscan<sup>6</sup> absorption correction procedures were applied to the data. The structures were solved, using the WINGX package,<sup>7</sup> by direct methods (SHELXS-97) and refined using full-matrix least-squares against F<sup>2</sup> (SHELXL-14).<sup>8</sup> Full-matrix least-squares refinements were carried out by minimizing  $\Sigma w(F_o^2 - F_c^2)^2$  with the SHELXL-14 weighting scheme and stopped at shift/err < 0.001. All non-hydrogen atoms were anisotropically refined and hydrogen atoms were geometrically placed and left riding on their parent atoms except for:

For (1*S*,4*R*)-1a·C<sub>6</sub>D<sub>6</sub> the hydrogen atoms bonded to N11 and N21 were found in the Fourier map and freely refined. Hydrogen atoms on C1, C2, C5 and C6 (that corresponds to the methyl groups that show an interaction with the potassium atoms), were not possible to be geometrically placed or to be modeled from the Fourier map. One carbon atom (C75) from the toluene coordinated to K1 was disorder but the disorder was not treated. One molecule of deuterated benzene per molecule of compound was found in the difference Fourier map but was very disordered and it was not possible to get a chemically sensible model for it, so the Squeeze procedure<sup>9</sup> was used to remove its contribution to the structure factors.

For (1*R*,4*S*)-1a·C<sub>6</sub>D<sub>6</sub> data quality was very poor, so C12 and C44 were left isotropic. Hydrogen atoms on C1, C2, C5 and C6 (that corresponds to the methyl groups that show an interaction with the potassium atoms), were not possible to be geometrically placed or to be modeled from the Fourier map. Three carbon atoms from the toluene molecules coordinated were disordered (C63, C72, C73) but the disorder was not treated. Some restraints (FLAT) were applied to the phenyl group (C41>C46) bonded to N21. As well one molecule of deuterated benzene per molecule of compound was found in the difference Fourier map but was very disordered and it was not possible to get a

chemically sensible model for it, so the Squeeze procedure<sup>9</sup> was used to remove its contribution to the structure factors

For the **(1*S*,4*R*)-1c·0.5(C<sub>7</sub>H<sub>8</sub>·C<sub>6</sub>D<sub>6</sub>)**, there is one C<sub>6</sub>D<sub>6</sub> and one toluene molecule per two molecules of the compound. The molecule of C<sub>6</sub>D<sub>6</sub> shows an interaction with the compound **(1*S*,4*R*)-1c·0.5(C<sub>7</sub>H<sub>8</sub>·C<sub>6</sub>D<sub>6</sub>)** and it was possible to be modeled, however the toluene molecule was not possible to make chemical sense of it so Squeeze procedure was applied.<sup>9</sup> C60, C65 and C75 from the coordinated benzene rings were disorder but the disordered was not treated. The hydrogen atoms for C1, C2, C5 and C6, that correspond to the methyl groups that show an interaction with the potassium atoms, and the hydrogen bonded to N11 and N21 were found in the Fourier map and freely refined. The enantiomer **(1*R*,4*S*)-1b·0.5(C<sub>7</sub>H<sub>8</sub>·C<sub>6</sub>D<sub>6</sub>)**, was identified by the coincidence with the unit cell with **(1*S*,4*R*)-1b·0.5(C<sub>7</sub>H<sub>8</sub>·C<sub>6</sub>D<sub>6</sub>)** but no data were taken.



**Table S2.** Crystallographic Data for **(1S,4R)-1a·C<sub>6</sub>D<sub>6</sub>**, **(1R,4S)-1a·C<sub>6</sub>D<sub>6</sub>**, **(1S,4R)-1c·0.5(C<sub>7</sub>H<sub>8</sub>·C<sub>6</sub>D<sub>6</sub>)** and **3 C<sub>6</sub>D<sub>6</sub>**.

|                                                          | <b>(1S,4R)-<br/>1a·C<sub>6</sub>D<sub>6</sub></b>                                                                              | <b>(1R,4S)-1a·C<sub>6</sub>D<sub>6</sub></b>                                                                                   | <b>(1S,4R)-1c·0.5<br/>(C<sub>7</sub>H<sub>8</sub>·C<sub>6</sub>D<sub>6</sub>)</b>                                                                                                | <b>3·C<sub>6</sub>D<sub>6</sub></b>                                |
|----------------------------------------------------------|--------------------------------------------------------------------------------------------------------------------------------|--------------------------------------------------------------------------------------------------------------------------------|----------------------------------------------------------------------------------------------------------------------------------------------------------------------------------|--------------------------------------------------------------------|
| Empirical formula                                        | C <sub>52</sub> H <sub>77</sub> Al <sub>2</sub> K <sub>2</sub> N <sub>4</sub><br>O <sub>2</sub> ·C <sub>6</sub> D <sub>6</sub> | C <sub>52</sub> H <sub>77</sub> Al <sub>2</sub> K <sub>2</sub> N <sub>4</sub> O <sub>2</sub> ·C <sub>6</sub><br>D <sub>6</sub> | C <sub>50</sub> H <sub>60</sub> Al <sub>2</sub> D <sub>12</sub> K <sub>2</sub> N <sub>4</sub><br>O <sub>2</sub> ·0.5 C <sub>7</sub> H <sub>8</sub> C <sub>6</sub> D <sub>6</sub> | C <sub>28</sub> H <sub>26</sub> AlKO·C <sub>6</sub> D <sub>6</sub> |
| Formula weight                                           | 1006.48                                                                                                                        | 1006.48                                                                                                                        | 993.48                                                                                                                                                                           | 528.71                                                             |
| Color, shape                                             | colorless/block                                                                                                                | colorless/block                                                                                                                | colorless/block                                                                                                                                                                  | colorless/block                                                    |
| Crystal size (mm)                                        | 0.46x0.41x0.32                                                                                                                 | 0.38x0.27x0.15                                                                                                                 | 0.48x0.45x0.42                                                                                                                                                                   | 0.32x0.23x0.11                                                     |
| Crystal system                                           | Orthorhombic                                                                                                                   | Orthorhombic                                                                                                                   | Orthorhombic                                                                                                                                                                     | Monoclinic                                                         |
| Space group                                              | <i>P2<sub>1</sub>2<sub>1</sub>2</i>                                                                                            | <i>P2<sub>1</sub>2<sub>1</sub>2</i>                                                                                            | <i>P2<sub>1</sub>2<sub>1</sub>2</i>                                                                                                                                              | <i>P2<sub>1</sub>/n</i>                                            |
| a (Å)                                                    | 11.9997(17)                                                                                                                    | 32.214(11)                                                                                                                     | 31.579(5)                                                                                                                                                                        | 9.3304(19)                                                         |
| b (Å)                                                    | 32.297(9)                                                                                                                      | 11.964(8)                                                                                                                      | 11.8642(11)                                                                                                                                                                      | 22.004(7)                                                          |
| c (Å)                                                    | 15.606(7)                                                                                                                      | 15.575(14)                                                                                                                     | 15.4746(14)                                                                                                                                                                      | 14.487(4)                                                          |
| β (deg.)                                                 | 90                                                                                                                             | 90                                                                                                                             | 90                                                                                                                                                                               | 92.699(19)                                                         |
| V (Å <sup>3</sup> )                                      | 6048(3)                                                                                                                        | 6003(7)                                                                                                                        | 5797.8(12)                                                                                                                                                                       | 2971.0(14)                                                         |
| Z                                                        | 4                                                                                                                              | 4                                                                                                                              | 4                                                                                                                                                                                | 4                                                                  |
| T(K)                                                     | 200                                                                                                                            | 200                                                                                                                            | 200                                                                                                                                                                              | 200                                                                |
| ρ <sub>calcd.</sub> (mg m <sup>-3</sup> )                | 1.105                                                                                                                          | 1.114                                                                                                                          | 1.138                                                                                                                                                                            | 1.182                                                              |
| F <sub>000</sub>                                         | 2156                                                                                                                           | 2156                                                                                                                           | 2104                                                                                                                                                                             | 1104                                                               |
| λ (Å)                                                    | 0.71073                                                                                                                        | 0.71073                                                                                                                        | 0.71073                                                                                                                                                                          | 0.71073                                                            |
| μ (mm <sup>-1</sup> )                                    | 0.226                                                                                                                          | 0.228                                                                                                                          | 0.235                                                                                                                                                                            | 0.232                                                              |
| θ Range (°)                                              | 3.114 to 23.520                                                                                                                | 3.049 to 19.997                                                                                                                | 3.099 to 26.899                                                                                                                                                                  | 3.114 to 24.998                                                    |
| Data collected<br>(h,k,l)                                | ±13, ±36, ±17                                                                                                                  | ±30, ±11, ±14                                                                                                                  | ±40, ±15, ±19                                                                                                                                                                    | ±11, ±26, ±17                                                      |
| Reflns. collected                                        | 55741                                                                                                                          | 92427                                                                                                                          | 66701                                                                                                                                                                            | 19633                                                              |
| Indep. Reflns./Rint                                      | 8910 / 0.1287                                                                                                                  | 5580 / 0.1692                                                                                                                  | 12414 / 0.0669                                                                                                                                                                   | 5217 / 0.1341                                                      |
| Data/restraints/param                                    | 8910 / 0 / 567                                                                                                                 | 5580 / 3 / 549                                                                                                                 | 12414 / 0 / 624                                                                                                                                                                  | 5217 / 0 / 350                                                     |
| R <sub>1</sub> /wR <sub>2</sub> (I > 2σ(I)) <sup>a</sup> | 0.0790 / 0.2060                                                                                                                | 0.0998 / 0.2245                                                                                                                | 0.0584/ 0.1398                                                                                                                                                                   | 0.0720 / 0.1425                                                    |
| R <sub>1</sub> /wR <sub>2</sub> (all data) <sup>a</sup>  | 0.1028 / 0.2251                                                                                                                | 0.1572 / 0.2563                                                                                                                | 0.0820 / 0.1540                                                                                                                                                                  | 0.1551 / 0.1648                                                    |
| Flack parameter                                          | -0.03(4)                                                                                                                       | -0.02(5)                                                                                                                       | 0.00(2)                                                                                                                                                                          |                                                                    |
| GOF                                                      | 1.011                                                                                                                          | 1.014                                                                                                                          | 1.045                                                                                                                                                                            | 1.026                                                              |
| Max/min Δρ (e.Å <sup>-3</sup> )                          | 0.318 / -0.289                                                                                                                 | 0.323 / -0.281                                                                                                                 | 0.298 / -0.249                                                                                                                                                                   | 0.247 / -0.170                                                     |

<sup>a</sup> R<sub>1</sub> = Σ(|F<sub>o</sub>| - |F<sub>c</sub>|)/Σ|F<sub>o</sub>|; wR<sub>2</sub> = {Σ[w(F<sub>o</sub><sup>2</sup> - F<sub>c</sub><sup>2</sup>)]/Σ[w(F<sub>o</sub><sup>2</sup>)]}<sup>1/2</sup>; GOF = {Σ[w(F<sub>o</sub><sup>2</sup> - F<sub>c</sub><sup>2</sup>)]/(n - p)}<sup>1/2</sup>.

**Table S3.** Selected bond lengths [Å] and angles [deg] for **(1S,4R)-1a·C<sub>6</sub>D<sub>6</sub>**, **(1R,4S)-1a·C<sub>6</sub>D<sub>6</sub>** and **(1S,4R)-1c·0.5(C<sub>7</sub>H<sub>8</sub>·C<sub>6</sub>D<sub>6</sub>)**

| <b>(1S,4R)-1a·C<sub>6</sub>D<sub>6</sub></b> |           | <b>(1R,4S)-1a·C<sub>6</sub>D<sub>6</sub></b> |           | <b>(1S,4R)-1c·0.5(C<sub>7</sub>H<sub>8</sub>·C<sub>6</sub>D<sub>6</sub>)</b> |            |
|----------------------------------------------|-----------|----------------------------------------------|-----------|------------------------------------------------------------------------------|------------|
| <b>BONDS (Å)</b>                             |           |                                              |           |                                                                              |            |
| Al(1)-O(2)                                   | 1.828(6)  | Al(1)-O(2)                                   | 1.804(13) | Al(1)-O(2)                                                                   | 1.833(3)   |
| Al(1)-C(1)                                   | 2.007(9)  | Al(1)-C(1)                                   | 2.01(2)   | Al(1)-C(1)                                                                   | 1.981(6)   |
| Al(1)-C(2)                                   | 2.003(9)  | Al(1)-C(2)                                   | 1.99(2)   | Al(1)-C(2)                                                                   | 1.969(6)   |
| Al(1)-C(3)                                   | 1.990(9)  | Al(1)-C(3)                                   | 2.03(2)   | Al(1)-C(3)                                                                   | 1.965(5)   |
| Al(2)-O(1)                                   | 1.835(6)  | Al(2)-O(1)                                   | 1.824(12) | Al(2)-O(1)                                                                   | 1.829(3)   |
| Al(2)-C(4)                                   | 1.983(10) | Al(2)-C(4)                                   | 1.99(2)   | Al(2)-C(4)                                                                   | 1.970(6)   |
| Al(2)-C(5)                                   | 1.999(11) | Al(2)-C(5)                                   | 2.002(19) | Al(2)-C(5)                                                                   | 1.983(7)   |
| Al(2)-C(6)                                   | 2.005(11) | Al(2)-C(6)                                   | 2.01(2)   | Al(2)-C(6)                                                                   | 1.983(7)   |
| K(1)-N(1)                                    | 2.738(6)  | K(1)-N(1)                                    | 2.724(14) | K(1)-N(1)                                                                    | 2.719(3)   |
| K(1)-N(2)                                    | 2.734(6)  | K(1)-N(2)                                    | 2.739(17) | K(1)-N(2)                                                                    | 2.733(3)   |
| K(1)-O(1)                                    | 2.879(5)  | K(1)-O(1)                                    | 2.994(12) | K(1)-O(1)                                                                    | 2.822(3)   |
| K(1)-O(2)                                    | 3.009(5)  | K(1)-O(2)                                    | 2.884(13) | K(1)-O(2)                                                                    | 3.039(3)   |
| K(1)-C(2)                                    | 3.132(9)  | K(1)-C(2)                                    | 3.13(2)   | K(1)-C(2)                                                                    | 3.118(6)   |
| K(1)-C(6)                                    | 3.117(10) | K(1)-C(6)                                    | 3.118(19) | K(1)-C(6)                                                                    | 3.178(7)   |
| K(1)-C(70)                                   | 3.496(9)  | K(1)···C(72)                                 | 3.56(2)   | K(1)-C(70)                                                                   | 3.337(6)   |
| K(1)-C(71)                                   | 3.470(9)  | K(1)-C(72)                                   | 3.50(2)   | K(1)-C(71)                                                                   | 3.380(5)   |
| K(1)-C(72)                                   | 3.408(10) | K(1)-C(73)                                   | 3.46(2)   | K(1)-C(72)                                                                   | 3.424(6)   |
| K(1)-C(73)                                   | 3.418(11) | K(1)-C(74)                                   | 3.38(3)   | K(1)-C(73)                                                                   | 3.433(6)   |
| K(1)-C(74)                                   | 3.435(12) | K(1)-C(75)                                   | 3.35(2)   | K(1)-C(74)                                                                   | 3.390(6)   |
| K(1)-C(75)                                   | 3.455(10) | K(1)-C(76)                                   | 3.41(2)   | K(1)-C(75)                                                                   | 3.341(6)   |
| K(2)-O(1)                                    | 2.583(5)  | K(2)-O(1)                                    | 2.546(12) | K(2)-O(1)                                                                    | 2.567(3)   |
| K(2)-O(2)                                    | 2.574(5)  | K(2)-O(2)                                    | 2.584(13) | K(2)-O(2)                                                                    | 2.565(3)   |
| K(2)-C(1)                                    | 3.150(9)  | K(2)-C(1)                                    | 3.13(2)   | K(2)-C(1)                                                                    | 3.251(9)   |
| K(2)-C(5)                                    | 3.135(12) | K(2)-C(5)                                    | 3.16(2)   | K(2)-C(5)                                                                    | 3.171(8)   |
| K(2)-C(60)                                   | 3.229(10) | K(2)-C(61)                                   | 3.26(2)   | K(2)-C(60)                                                                   | 3.270(7)   |
| K(2)-C(61)                                   | 3.138(9)  | K(2)-C(62)                                   | 3.36(3)   | K(2)-C(61)                                                                   | 3.165(6)   |
| K(2)-C(62)                                   | 3.200(10) | K(2)-C(63)                                   | 3.41(3)   | K(2)-C(62)                                                                   | 3.118(6)   |
| K(2)-C(63)                                   | 3.326(11) | K(2)-C(64)                                   | 3.30(3)   | K(2)-C(63)                                                                   | 3.186(6)   |
| K(2)-C(64)                                   | 3.369(11) | K(2)-C(65)                                   | 3.15(2)   | K(2)-C(64)                                                                   | 3.286(6)   |
| K(2)-C(65)                                   | 3.336(11) | K(2)-C(66)                                   | 3.10(2)   | K(2)-C(65)                                                                   | 3.330(7)   |
| N(1)-O(1)                                    | 1.408(8)  | N(1)-O(1)                                    | 1.406(16) | N(1)-O(1)                                                                    | 1.412(4)   |
| N(1)-C(10)                                   | 1.277(9)  | N(1)-C(10)                                   | 1.279(18) | N(1)-C(10)                                                                   | 1.283(5)   |
| N(2)-O(2)                                    | 1.427(8)  | N(2)-O(2)                                    | 1.451(17) | N(2)-O(2)                                                                    | 1.417(4)   |
| N(2)-C(20)                                   | 1.279(9)  | N(2)-C(39)                                   | 1.281(19) | N(2)-C(20)                                                                   | 1.266(5)   |
| N(11)-C(11)                                  | 1.482(12) | N(11)-C(11)                                  | 1.431(19) | N(11)-C(11)                                                                  | 1.463(6)   |
| N(11)-C(31)                                  | 1.422(15) | N(11)-C(26)                                  | 1.34(2)   | N(11)-C(31)                                                                  | 1.395(7)   |
| N(21)-C(21)                                  | 1.489(9)  | N(21)-C(21)                                  | 1.47(2)   | N(21)-C(21)                                                                  | 1.477(5)   |
| N(21)-C(41)                                  | 1.396(9)  | N(21)-C(46)                                  | 1.42(3)   | N(21)-C(41)                                                                  | 1.387(6)   |
| <b>ANGLES (°)</b>                            |           |                                              |           |                                                                              |            |
| O(1)-K(1)-O(2)                               | 74.03(14) | O(2)-K(1)-O(1)                               | 73.5(3)   | O(1)-K(1)-O(2)                                                               | 74.11(8)   |
| O(2)-K(2)-O(1)                               | 86.87(17) | O(1)-K(2)-O(2)                               | 86.6(4)   | O(2)-K(2)-O(1)                                                               | 87.10(9)   |
| N(1)-O(1)-Al(2)                              | 119.0(4)  | N(1)-O(1)-Al(2)                              | 117.4(9)  | N(1)-O(1)-Al(2)                                                              | 117.2(2)   |
| N(1)-O(1)-K(2)                               | 131.8(4)  | N(1)-O(1)-K(2)                               | 130.9(9)  | N(1)-O(1)-K(2)                                                               | 132.7(2)   |
| Al(2)-O(1)-K(2)                              | 109.0(2)  | Al(2)-O(1)-K(2)                              | 109.9(5)  | Al(2)-O(1)-K(2)                                                              | 110.06(13) |
| N(1)-O(1)-K(1)                               | 70.0(3)   | N(1)-O(1)-K(1)                               | 65.3(7)   | N(1)-O(1)-K(1)                                                               | 71.20(18)  |
| Al(2)-O(1)-K(1)                              | 98.6(2)   | Al(2)-O(1)-K(1)                              | 95.4(5)   | Al(2)-O(1)-K(1)                                                              | 99.31(12)  |
| K(2)-O(1)-K(1)                               | 101.1(2)  | K(2)-O(1)-K(1)                               | 99.0(4)   | K(2)-O(1)-K(1)                                                               | 102.11(10) |
| N(2)-O(2)-Al(1)                              | 118.3(4)  | N(2)-O(2)-Al(1)                              | 120.4(10) | N(2)-O(2)-Al(1)                                                              | 117.7(2)   |
| N(2)-O(2)-K(2)                               | 129.5(4)  | N(2)-O(2)-K(2)                               | 130.0(9)  | N(2)-O(2)-K(2)                                                               | 127.2(2)   |

|                 |           |                 |          |                 |            |
|-----------------|-----------|-----------------|----------|-----------------|------------|
| Al(1)-O(2)-K(2) | 109.9(2)  | Al(1)-O(2)-K(2) | 109.5(6) | Al(1)-O(2)-K(2) | 112.54(13) |
| N(2)-O(2)-K(1)  | 65.1(3)   | N(2)-O(2)-K(1)  | 69.6(8)  | N(2)-O(2)-K(1)  | 64.02(17)  |
| Al(1)-O(2)-K(1) | 94.8(2)   | Al(1)-O(2)-K(1) | 99.2(5)  | Al(1)-O(2)-K(1) | 95.51(12)  |
| K(2)-O(2)-K(1)  | 97.97(16) | K(2)-O(2)-K(1)  | 100.9(4) | K(2)-O(2)-K(1)  | 96.56(9)   |

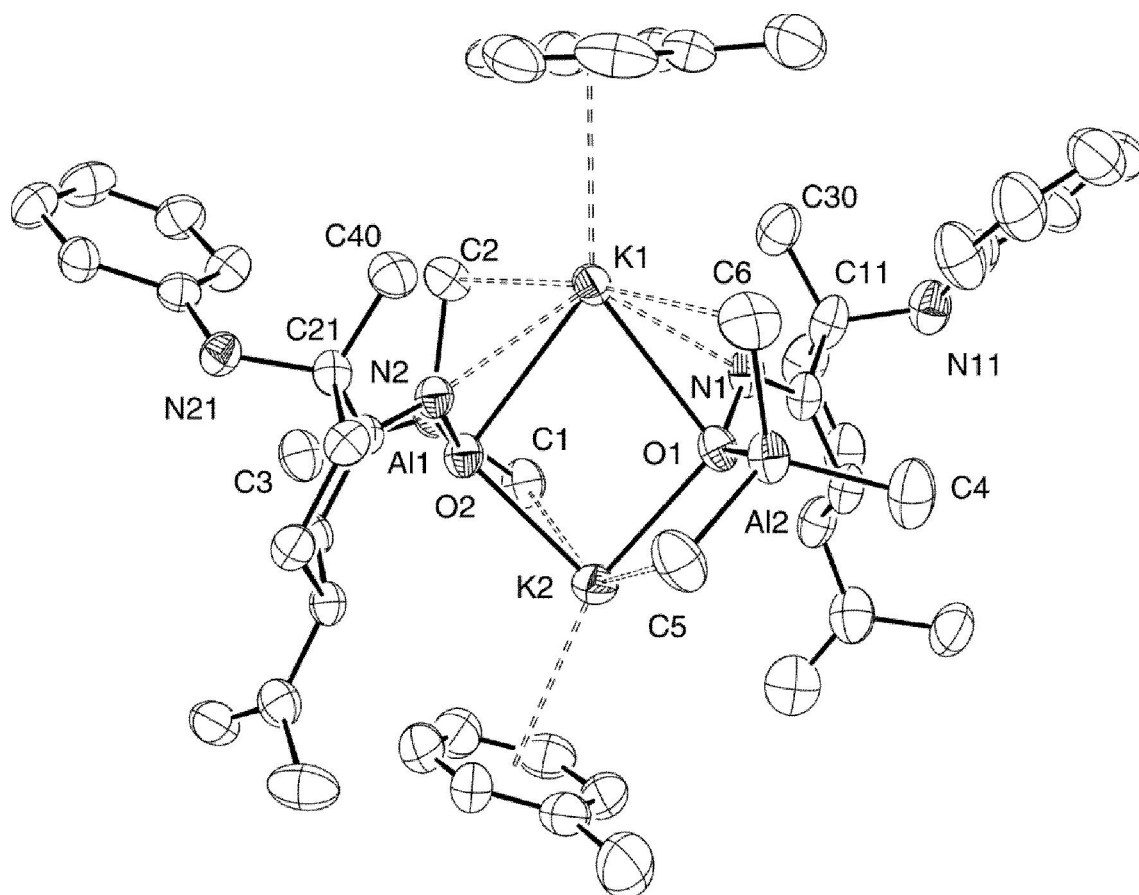

Figure S29a. Molecular structure of (1*S*,4*R*)-1a

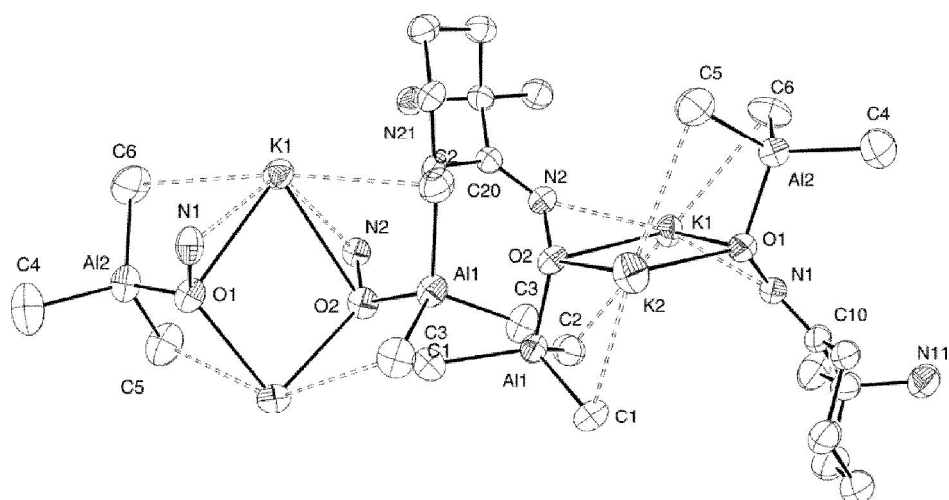

Figure S29b. Two views of (1*S*,4*R*)-1a core.

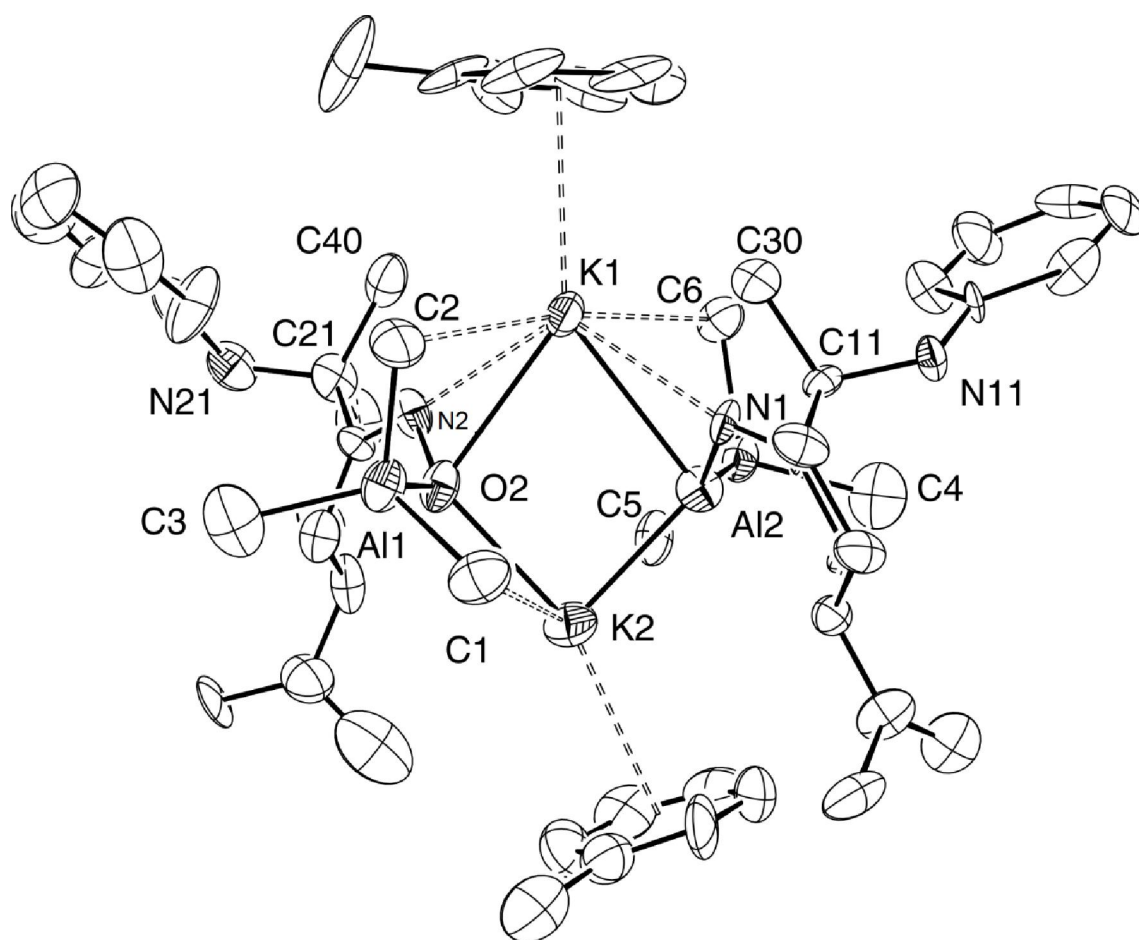

Figure S30a. Molecular structure of (1*R*,4*S*)-1a.

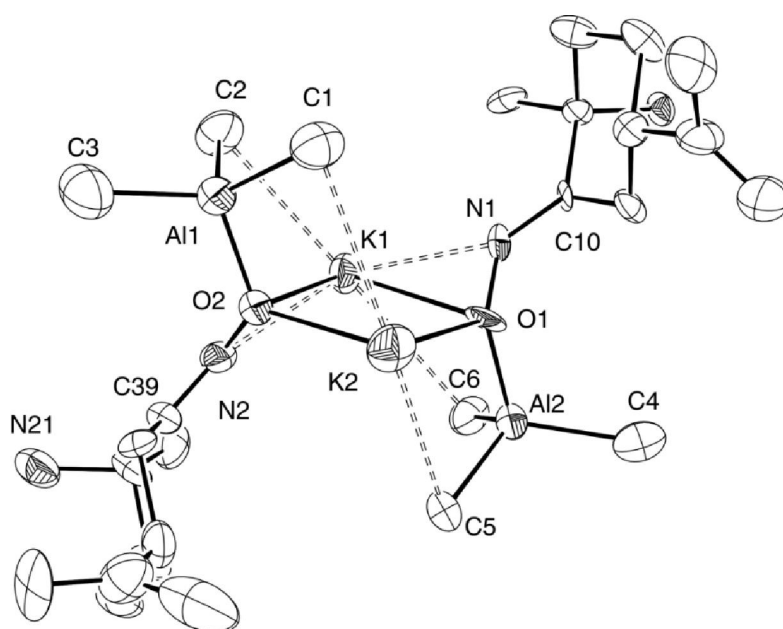

Figure S30b. (1R,4S)-1a·core

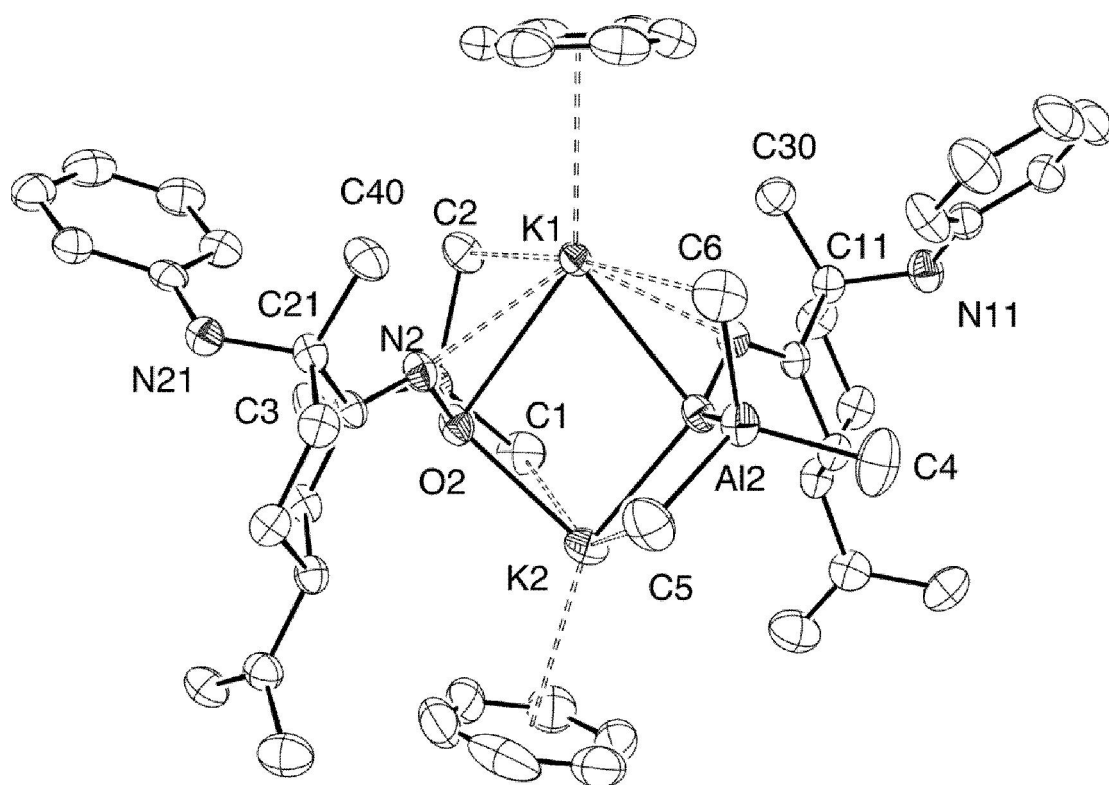

Figure S31a. Molecular structure of **(1*S*,4*R*)-1aC<sub>6</sub>D<sub>6</sub>**.

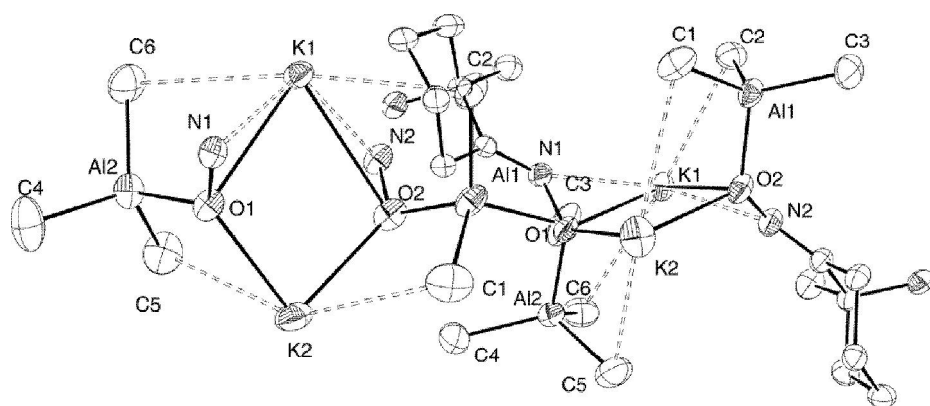

**Figure S31b.** Two views of (1*S*,4*R*)-1a core.

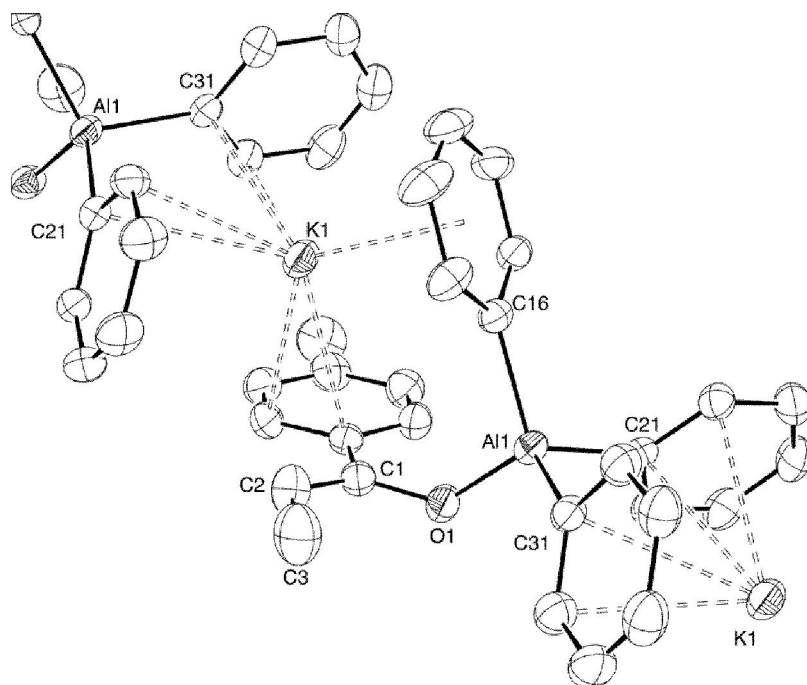

**Figure S32.** Molecular structure of **3**.

**Table S4.** Selected bond lengths [Å] and angles [deg] for **3**·C<sub>6</sub>H<sub>6</sub>.

| BONDS (Å)     |          | ANGLES (°)          |            |
|---------------|----------|---------------------|------------|
| O(1)-C(1)#1   | 1.347(4) | C(1)#1-O(1)-Al(1)   | 130.8(2)   |
| O(1)-Al(1)    | 1.753(3) | O(1)-Al(1)-C(31)    | 112.00(16) |
| Al(1)-C(31)   | 1.990(4) | O(1)-Al(1)-C(21)    | 108.31(15) |
| Al(1)-C(21)   | 1.998(4) | C(31)-Al(1)-C(21)   | 105.31(15) |
| Al(1)-C(16)#1 | 1.994(4) | O(1)-Al(1)-C(16)#1  | 109.77(13) |
| C(1)-C(2)     | 1.319(6) | C(31)-Al(1)-C(16)#1 | 111.71(16) |
| C(1)-O(1)#2   | 1.347(4) | C(21)-Al(1)-C(16)#1 | 109.57(17) |
| C(1)-C(10)    | 1.483(6) | C(2)-C(1)-O(1)#2    | 121.7(5)   |
| C(2)-C(3)     | 1.491(7) | C(2)-C(1)-C(10)     | 123.0(4)   |
|               |          | O(1)#2-C(1)-C(10)   | 115.3(4)   |
|               |          | C(1)-C(2)-C(3)      | 125.2(5)   |

## V. Computational Details.

Electronic structure calculations were carried out with the B3LYP<sup>[10]</sup> density functional along with the 6-31G(d) basis set. Minimum energy and transition state structures were optimized by computing analytical energy gradients. The obtained stationary points were characterized by performing energy second derivatives, confirming them as minima or first order saddle points by the number of negative eigenvalues of the hessian matrix of the energy (zero and one negative eigenvalues respectively). To further refine the energies obtained from the B3LYP/6-31G(d) calculations and to describe solvation effects, single-point calculations in toluene solution using the IEF-PCM model<sup>[11]</sup> on the previously optimized gas phase structures were performed using the larger 6-311+G(2d,p) basis set. In order to compare the reaction and activation energies obtained with the hybrid B3LYP functional, single point calculations with the pure BP86<sup>[12]</sup> and hybrid meta-GGA M06-2X<sup>[13]</sup> functionals and the 6-311+G(2d,p) basis set in toluene solution on the B3LYP/6-31G(d) optimized structures were also performed. Computed electronic energies were corrected for zero-point energy, thermal energy, and entropic effects to obtain the corresponding thermodynamic properties  $H^0$  and  $G^0$  at 298.15 K. All calculations were carried out with the Gaussian 09 suite of programs.<sup>[14]</sup>

A truncated model (**1c<sub>m</sub>**) was used where the ONL<sub>1</sub> ligands and the ancillary ketone not converted to the enolate in **1c** were replaced by ON=CMe<sub>2</sub> and acetone respectively. The optimized geometry of the starting K-Al model complex is in reasonably good agreement with the structure determined by X-ray crystallography for **1c** (Table S5). The computed structure of **1c<sub>m</sub>** is more symmetrical and has significantly longer K-C(benzene) distances than those found in the X-ray structure of **1c**. However, minimization of **1c<sub>m</sub>** while constraining it to have the crystallographic K-C(benzene) metrics gave an energy that is only 1.6 kcal/mol higher.

Different functionals were employed to test the dependence of the energetic results obtained by DFT with the functional used. Several alternative mechanisms were



studied as shown in Figure S29. Although the relative values obtained with the three functionals are different (Table S6), independently of the computational method employed, the lowest energy path found yielding the enolate complex **2<sub>m</sub>** is that shown in Scheme 3 in the main text of the current article.

**Table S5.** Comparison of selected bond lengths (Å) and angles (degrees) for the optimized structure of **1c<sub>m</sub>** and the X-ray structure of **1c**.

|                    | <b>1c<sub>m</sub></b> (calc) <sup>a</sup> | <b>1c</b> (expt) <sup>a</sup> |
|--------------------|-------------------------------------------|-------------------------------|
| K1-O               | 2.916                                     | 2.931                         |
| K1-N               | 2.755                                     | 2.726                         |
| K1-C(benzene)      | 3.524                                     | 3.384                         |
| K2-O               | 2.633                                     | 2.566                         |
| K2-C(benzene)      | 3.494                                     | 3.226                         |
| Al-O               | 1.888                                     | 1.831                         |
| Al-CH <sub>3</sub> | 2.016                                     | 1.975                         |
| N-O                | 1.404                                     | 1.415                         |
| C=N                | 1.285                                     | 1.275                         |
| O1-K1-O2           | 78.0                                      | 74.1                          |
| O1-K2-O2           | 88.4                                      | 87.1                          |
| K2-O-K1            | 96.8                                      | 99.3                          |
| N-O-Al             | 116.6                                     | 117.5                         |
| N-O-K2             | 135.2                                     | 130.0                         |
| N-O-K1             | 69.1                                      | 67.6                          |
| Al-O-K2            | 107.2                                     | 111.3                         |
| Al-O-K1            | 98.4                                      | 97.4                          |

<sup>a</sup> Average values

**Table S6.** Relative enthalpies and Gibbs energies (between brackets) at 298.15 K for all the species studied. All values in kcal/mol. Data in bold font correspond to the highest stationary point (both in *H* and *G*) along a certain mechanistic pathway (See Figure S32).

|                                             | B3LYP               | BP86                | M06-2x              |
|---------------------------------------------|---------------------|---------------------|---------------------|
| <b>1c<sub>m</sub></b>                       | 0.0; [0.0]          | 0.0; [0.0]          | 0.0; [0.0]          |
| <b>1c<sub>m</sub></b>                       | -6.7; [-8.7]        | -5.6; [-7.5]        | -0.3; [-2.2]        |
| <b>TS(1c<sub>m</sub>-IIc<sub>m</sub>)</b>   | <b>24.2; [29.7]</b> | <b>19.4; [24.8]</b> | 19.8; [25.3]        |
| <b>IIc<sub>m</sub></b>                      | 9.3; [15.1]         | 7.0; [12.7]         | -1.5; [4.2]         |
| <b>TS(IIc<sub>m</sub>-IIIc<sub>m</sub>)</b> | 20.5; [23.7]        | 15.7; [18.9]        | <b>22.5; [25.7]</b> |
| <b>IIIc<sub>m</sub></b>                     | 6.0; [9.4]          | 4.9; [8.3]          | 0.9; [4.3]          |
| <b>TS(IIIc<sub>m</sub>-2<sub>m</sub>)</b>   | 20.8; [23.5]        | 16.2; [18.9]        | 19.0; [21.8]        |
| <b>2<sub>m</sub></b>                        | -32.7; [-39.3]      | -31.1; [-37.7]      | -29.8; [-36.4]      |
| <b>TS(1c<sub>m</sub>-2<sub>m</sub>)</b>     | <b>34.5; [38.7]</b> | <b>27.9; [32.1]</b> | <b>32.5; [36.8]</b> |
| <b>TS(IIc<sub>m</sub>-2<sub>m</sub>)</b>    | <b>46.9; [50.5]</b> | <b>38.2; [41.8]</b> | <b>50.1; [53.7]</b> |
| <b>TS(IIc<sub>m</sub>-IVc<sub>m</sub>)</b>  | 21.5; [26.1]        | 14.4; [19.0]        | 23.2; [27.8]        |
| <b>IVc<sub>m</sub></b>                      | 11.9; [16.0]        | 9.2; [13.3]         | 11.0; [15.2]        |
| <b>TS(IVc<sub>m</sub>-2<sub>m</sub>)</b>    | <b>27.3; [31.3]</b> | <b>21.3; [25.3]</b> | <b>26.0; [30.0]</b> |

|                                             |                     |                     |                     |
|---------------------------------------------|---------------------|---------------------|---------------------|
| <b>Ic'<sub>m</sub></b>                      | -7.9; [-7.5]        | -6.8; [-6.4]        | -2.7; [-2.3]        |
| <b>TS(Ic'<sub>m</sub>-IIc'<sub>m</sub>)</b> | <b>28.8; [32.7]</b> | <b>25.6; [29.4]</b> | <b>28.7; [32.5]</b> |
| <b>IIc'<sub>m</sub></b>                     | 18.4; [20.1]        | 17.1; [18.7]        | 25.6; [27.2]        |
| <b>TS(Ic'<sub>m</sub>-2'<sub>m</sub>)</b>   | <b>44.9; [50.0]</b> | <b>36.2; [41.3]</b> | <b>40.7; [45.7]</b> |
| <b>2'<sub>m</sub></b>                       | -31.9; [-39.2]      | -30.3; [-37.5]      | -28.7; [-36.0]      |
| <b>TS(Ic<sub>m</sub>-Vc<sub>m</sub>)</b>    | <b>26.1; [30.5]</b> | <b>21.0; [25.4]</b> | <b>26.1; [30.5]</b> |
| <b>Vc<sub>m</sub></b>                       | -30.9; [-26.0]      | -30.0; [-25.1]      | -39.9; [-35.0]      |
| <b>TS(Ic'<sub>m</sub>-Vc'<sub>m</sub>)</b>  | <b>26.0; [30.0]</b> | <b>20.6; [24.6]</b> | <b>26.2; [30.3]</b> |
| <b>Vc'<sub>m</sub></b>                      | -31.9; [-26.6]      | -31.0; [-25.7]      | -40.2; [-34.9]      |

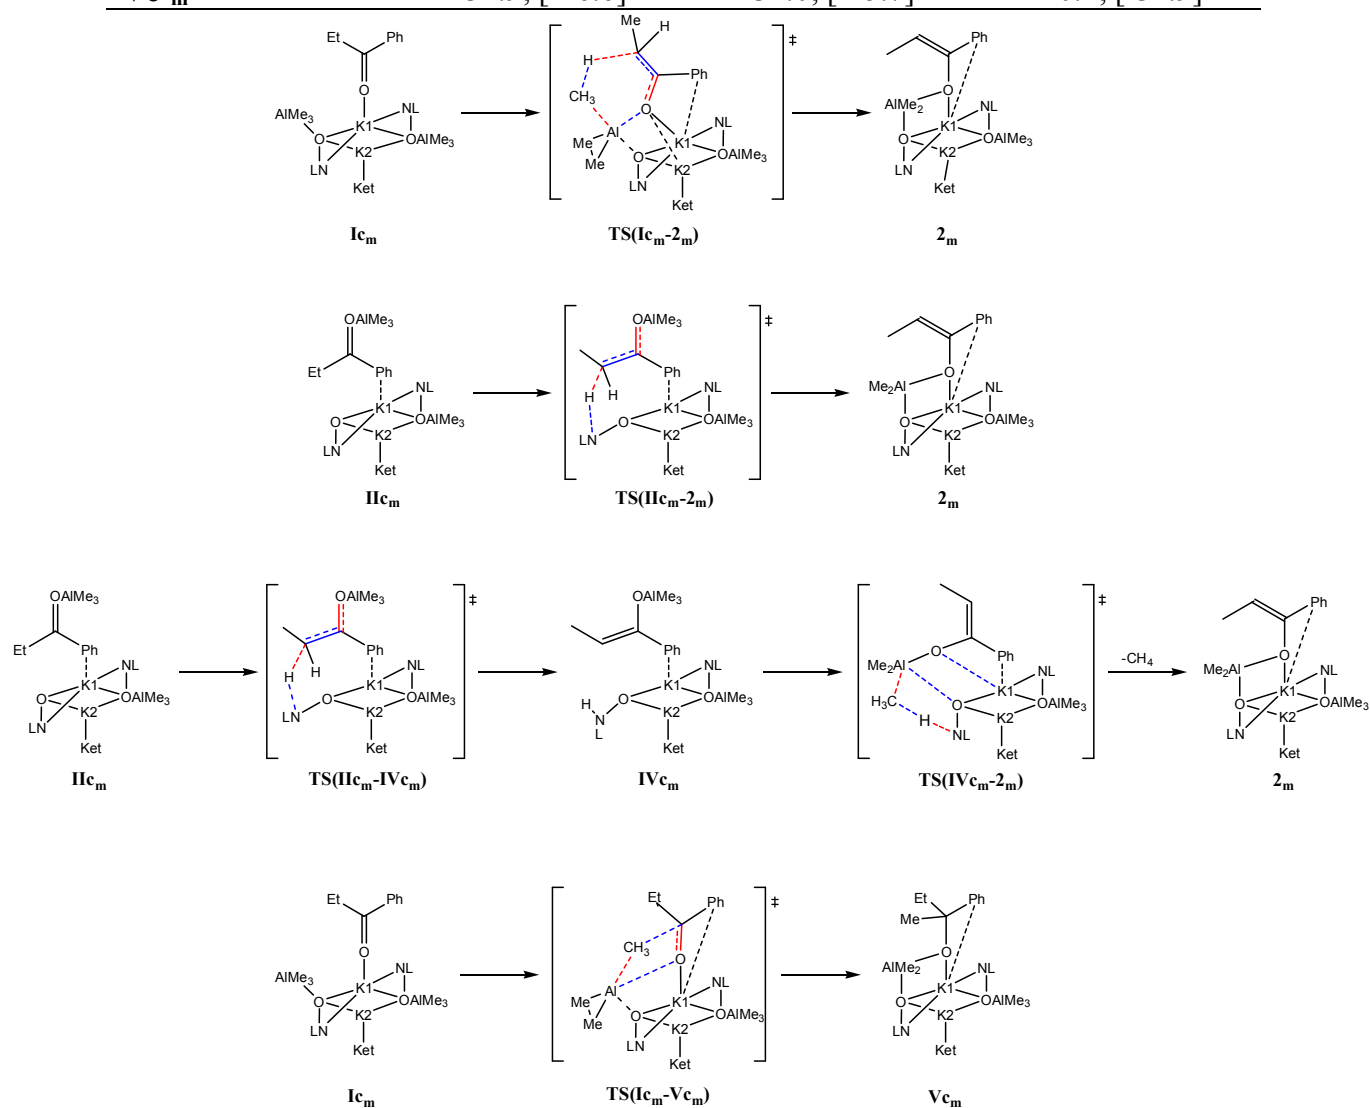

**Figure S33.** Alternative mechanisms computationally explored by DFT calculations. Ket = Me<sub>2</sub>CO, L = CMe<sub>2</sub>. Stereochemistry and formal charges not shown for simplicity. Bonds being broken and formed in the transition states in red and blue respectively. The analogous possible pathways where the ketone that converts to the enolate is the one coordinated to the K2 potassium were also studied (**Ic'<sub>m</sub>** → **2'<sub>m</sub>**; **IIc'<sub>m</sub>** → **2'<sub>m</sub>**; **Ic'<sub>m</sub>** → **V'<sub>m</sub>**)

## References

- [1] a). D. J. Brecknell, R. M. Carman, B. Singaram, J. Verghese, *Aust. J. Chem.* **1977**, *30*, 195-203. b) A. V. Tkachev, A. V. Rukavishnikov, A. M. Chibiryaev, A. Y. Denisov, Y. V. Gatilov, I. Y. Bagryanskaya, *Aust. J. Chem.* **1992**, *45*, 1077-1086.
- [2] D. Zuccaccia, S. Sabatini, G. Bellachioma, G. Cardaci, E. Clot, A. Macchioni, *Inorg. Chem.* **2003**, *42*, 5465-5467.
- [3] a) Muñoz, M.T.; Urbaneja, C.; Temprado, M.; Mosquera, M. E. G.; Cuenca, T. *Chem. Commun.* **2011**, *47*, 11757-11759. (b) Armstrong, D. R.; García-Álvarez, P.; Kennedy, A. R.; Mulvey, R. E.; Parkinson, J. A. *Angew. Chem. Int. Edit.* **2010**, *49*, 3185-3188. (c) Baillie, S. E.; Clegg, W.; García-Álvarez, P.; Hevia, E.; Kennedy, A. R.; Klett, J.; Russo, L. *Chem. Commun.* **2011**, *47*, 388-390. (d) Baillie, S. E.; Clegg, W.; García-Álvarez, P.; Hevia, E.; Kennedy, A. R.; Klett, J.; Russo, L. *Organometallics* **2012**, *31*, 5131-5142.
- [4] a) D. Li, I. Keresztes, R. Hopson and P. G. Williard, *Acc. Chem. Res.*, 2009, **42**, 270. b) D. Li, G. Kagan, R. Hopson, P. Williard, *J. Am. Chem. Soc.* 2009, **131**, 5627.
- [5] a) R. Neufeld, D. Stalke, *Chem. Sci.* **2015**, *6*, 3354-3364. b) R. Neufeld, M. John, D. Stalke, *Angew. Chem., Int. Ed.* **2015**, *54*, 6994-6998.
- [6] R. H. Blessing, SORTAV, *Acta Crystallogr., Sect. A: Fundam. Crystallogr.*, **1995**, *51*, 33
- [7] L. J. Farrugia, *J. Appl. Crystallogr.*, **1999**, *32*, 837.
- [8] a) G. M. Sheldrick, *Acta Crystallogr.*, **2008**, *A64*, 112. b) G. M. Sheldrick, *Acta Crystallogr.*, **2015**, *C71*, 3-8.
- [9] P. Van der Sluis and A. L. Spek, *Acta Crystallogr., Sect. A: Fundam. Crystallogr.*, **1990**, *46*, 194.
- [10] a) A. D. Becke, *J. Chem. Phys.* **1993**, *98*, 5648-5652; b) C. Lee, W. Yang, R. G. Parr, *Phys. Rev. B*, **1988**, *37*, 785-789.
- [11] a) J. Tomasi, B. Mennucci, R. Cammi, *Chem. Rev.* **2005**, *105*, 2999-3094; b) G. Scalmani, M. J. Frisch, *J. Chem. Phys.* **2010**, *132*, 114110.
- [12] a) A. D. Becke, *Phys. Rev. A*, **1988**, *38*, 3098-3100; b) J. P. Perdew, *Phys. Rev. B*, **1986**, *33*, 8822-8824.
- [13] Y. Zhao, D. G. Truhlar, *Theor. Chem. Acc.* **2008**, *120*, 215-241.
- [14] Gaussian 09, Revision D.01, M. J. Frisch, G. W. Trucks, H. B. Schlegel, G. E. Scuseria, M. A. Robb, J. R. Cheeseman, G. Scalmani, V. Barone, B. Mennucci, G. A. Petersson, H. Nakatsuji, M. Caricato, X. Li, H. P. Hratchian, A. F. Izmaylov, J. Bloino, G. Zheng, J. L. Sonnenberg, M. Hada, M. Ehara, K. Toyota, R. Fukuda, J. Hasegawa,

M. Ishida, T. Nakajima, Y. Honda, O. Kitao, H. Nakai, T. Vreven, J. A. Montgomery, Jr., J. E. Peralta, F. Ogliaro, M. Bearpark, J. J. Heyd, E. Brothers, K. N. Kudin, V. N. Staroverov, T. Keith, R. Kobayashi, J. Normand, K. Raghavachari, A. Rendell, J. C. Burant, S. S. Iyengar, J. Tomasi, M. Cossi, N. Rega, J. M. Millam, M. Klene, J. E. Knox, J. B. Cross, V. Bakken, C. Adamo, J. Jaramillo, R. Gomperts, R. E. Stratmann, O. Yazyev, A. J. Austin, R. Cammi, C. Pomelli, J. W. Ochterski, R. L. Martin, K. Morokuma, V. G. Zakrzewski, G. A. Voth, P. Salvador, J. J. Dannenberg, S. Dapprich, A. D. Daniels, O. Farkas, J. B. Foresman, J. V. Ortiz, J. Cioslowski, and D. J. Fox, Gaussian, Inc., Wallingford CT, 2013.

## Cartesian Coordinates

| <b>1C<sub>m</sub></b> |             |             |             | <b>1C<sub>m</sub></b> |             |             |             |
|-----------------------|-------------|-------------|-------------|-----------------------|-------------|-------------|-------------|
| C                     | -0.02850800 | 4.52101400  | -1.68166200 | C                     | -0.52070200 | -4.68827300 | 1.18023900  |
| C                     | -1.63764000 | 1.70438300  | -2.60448800 | C                     | -2.59071700 | -2.27251700 | 2.29301100  |
| C                     | 1.66908200  | 1.75202100  | -2.57472500 | C                     | 0.70116300  | -1.90513000 | 2.62183000  |
| C                     | 1.08415800  | -3.43522800 | -2.95957900 | C                     | -0.73689200 | 3.24488800  | 3.59039000  |
| C                     | -5.35473000 | 1.27142300  | -0.68463400 | C                     | 6.47034000  | -2.18882000 | 0.58066900  |
| C                     | 5.25595300  | 0.23195000  | -1.38811600 | C                     | 5.48167700  | -1.21076200 | 0.58370100  |
| C                     | -5.30916500 | 0.07494200  | -1.40893300 | C                     | 7.76188900  | -1.87586500 | 0.14565600  |
| C                     | 5.23543400  | -1.12211700 | -1.03686300 | C                     | -1.50931100 | 2.77508000  | 2.38725500  |
| C                     | 5.27156700  | 1.21262900  | -0.39046200 | C                     | -3.01146800 | 2.90107900  | 2.39562800  |
| C                     | 0.12383800  | -2.95888800 | -1.90329400 | C                     | 8.06015700  | -0.58125600 | -0.28326100 |
| C                     | -1.33577900 | -3.30318600 | -2.04997600 | C                     | 5.76959600  | 0.09756300  | 0.15627400  |
| C                     | -5.37628800 | 1.24192300  | 0.71433200  | C                     | -1.21373800 | -3.17259600 | -2.49883100 |
| C                     | -5.28638900 | -1.15064300 | -0.73404900 | C                     | 0.08746600  | -2.53409000 | -2.08492300 |
| C                     | 5.26599000  | 0.83902900  | 0.95777400  | C                     | 7.07159400  | 0.40153100  | -0.27565900 |
| C                     | 5.22931000  | -1.49559000 | 0.31138700  | C                     | 1.25583300  | -2.59544800 | -3.03151800 |
| C                     | -5.35201300 | 0.01623600  | 1.38923300  | C                     | 0.54574400  | 2.46088100  | -1.90574200 |
| C                     | -0.95061500 | 3.42232500  | 2.12898900  | C                     | -1.94389800 | 4.58369600  | -1.11582400 |
| C                     | -5.30740000 | -1.18019200 | 0.66496100  | C                     | -2.61577600 | 1.59279900  | -2.50131100 |
| C                     | 0.46317700  | 2.94023600  | 1.92873400  | H                     | -0.45012300 | -5.25620100 | 2.11994800  |
| C                     | 5.24403100  | -0.51487000 | 1.30909700  | H                     | -1.34852000 | -5.13814400 | 0.61088400  |
| C                     | 1.50027700  | 3.29890700  | 2.95839500  | H                     | 0.40048400  | -4.90559900 | 0.61952700  |
| C                     | 1.63876300  | -1.92105900 | 2.50456700  | H                     | 6.23673600  | -3.19521300 | 0.91643700  |
| C                     | -0.48075700 | -4.42171000 | 1.74148600  | H                     | 4.47558500  | -1.43929600 | 0.91891900  |
| C                     | -1.62109000 | -1.39358900 | 2.69910500  | H                     | 8.53446800  | -2.64008800 | 0.14240500  |
| H                     | 0.05187200  | 4.95622500  | -2.68885300 | H                     | -3.33938900 | 3.61073300  | 3.16149400  |
| H                     | -0.95540100 | 4.92463100  | -1.24614100 | H                     | -3.37676000 | 3.22466700  | 1.41787900  |
| H                     | 0.80248800  | 4.94254000  | -1.09708000 | H                     | -1.68576200 | -3.67076300 | -1.64859200 |
| H                     | 5.25709000  | 0.52362000  | -2.43446000 | H                     | -1.05463900 | -3.89606100 | -3.30449700 |
| H                     | -5.37722700 | 2.22232300  | -1.20957000 | H                     | 9.06278800  | -0.33593600 | -0.62185300 |
| H                     | -5.29463500 | 0.09975200  | -2.49492400 | H                     | 7.32015700  | 1.40243300  | -0.61263000 |
| H                     | 5.22802100  | -1.88432000 | -1.81149200 | H                     | -1.35293700 | 5.12857400  | -0.36489600 |
| H                     | 5.28672400  | 2.26405800  | -0.66370500 | H                     | -2.99931200 | 4.68645000  | -0.81991900 |
| H                     | -5.42142700 | 2.17112100  | 1.27629000  | H                     | -1.83390500 | 5.14140300  | -2.05790100 |
| H                     | -5.26012200 | -2.08052800 | -1.29599100 | N                     | -0.82978200 | 2.27736700  | 1.41665500  |
| H                     | -1.78411400 | -3.50510700 | -1.07466000 | N                     | 0.27144000  | -1.92181300 | -0.97019000 |
| H                     | -1.38484000 | 3.74761700  | 1.18044700  | O                     | -0.86427300 | -1.84079200 | -0.14830200 |
| H                     | -0.98399200 | 4.24702900  | 2.84747500  | O                     | -1.59879300 | 1.80013500  | 0.34277500  |
| H                     | 5.28147200  | 1.60124700  | 1.73224100  | Al                    | -0.77474600 | -2.73332300 | 1.51267300  |
| H                     | -5.37081900 | -0.00832200 | 2.47515900  | Al                    | -1.37707000 | 2.67621200  | -1.31369800 |
| H                     | 5.23521600  | -0.80657300 | 2.35536500  | K                     | 0.90761100  | 0.35951700  | 0.45327700  |
| H                     | 0.25347500  | -4.96338300 | 1.12709600  | K                     | -3.03368800 | -0.35457800 | -0.11870600 |
| H                     | -1.47514100 | -4.69329900 | 1.35499300  | H                     | 0.50060600  | -0.87756100 | 2.96956200  |
| H                     | -0.41535300 | -4.85432500 | 2.75089400  | H                     | 0.82227700  | -2.49879100 | 3.54059600  |
| N                     | 0.61431700  | -2.26886300 | -0.93627300 | H                     | 1.69271900  | -1.91166000 | 2.14058200  |
| N                     | 0.85068200  | 2.22595500  | 0.93312200  | H                     | -2.62687900 | 2.07036100  | -3.49290900 |
| O                     | -0.16416100 | 1.87058200  | 0.03011400  | H                     | -2.30029300 | 0.55263000  | -2.69254800 |
| O                     | -0.32581500 | -1.79760400 | -0.00553300 | H                     | -3.67145200 | 1.57425600  | -2.18153200 |
| Al                    | 0.00045400  | 2.52427300  | -1.73317900 | H                     | 1.27886700  | 2.82602000  | -1.16902200 |
| Al                    | -0.16526400 | -2.44885000 | 1.76001600  | H                     | 0.82892900  | 1.43330100  | -2.18866100 |
| K                     | 2.01705600  | -0.07609600 | -0.03159900 | H                     | 0.70828400  | 3.06737600  | -2.80966300 |
| K                     | -2.13094300 | 0.11988000  | 0.02731200  | H                     | -2.73622300 | -1.21243300 | 2.56434000  |
| H                     | 1.63716400  | 0.66206100  | -2.74224700 | H                     | -3.45347800 | -2.58820900 | 1.68202500  |
| H                     | 1.78086000  | 2.19200200  | -3.57748200 | H                     | -2.69718400 | -2.82188900 | 3.24070400  |
| H                     | 2.60713400  | 1.98889300  | -2.04866000 | C                     | 4.67005600  | 1.10828900  | 0.17360900  |
| H                     | -1.64399000 | -1.72360900 | 3.74879200  | C                     | 4.92860800  | 2.53869400  | -0.27137000 |
| H                     | -1.44785400 | -0.30457300 | 2.74904700  | H                     | 4.19252100  | 3.16667200  | 0.23950800  |
| H                     | -2.64522100 | -1.55922600 | 2.32628200  | O                     | 3.53457100  | 0.77895300  | 0.51525600  |
| H                     | 2.50276000  | -2.26878800 | 1.91694700  | C                     | 4.76281700  | 2.69232600  | -1.79808000 |
| H                     | 1.76430700  | -0.84076700 | 2.68871500  | H                     | 4.94560200  | 3.73115200  | -2.09099900 |
| H                     | 1.75023000  | -2.39400900 | 3.49219100  | H                     | 5.46456900  | 2.05522300  | -2.34732900 |
| H                     | -1.61377300 | 0.60569500  | -2.70937200 | H                     | 3.74461400  | 2.42989100  | -2.10240900 |
| H                     | -2.60291100 | 1.98231200  | -2.14986900 | H                     | 5.92495800  | 2.87242000  | 0.03668700  |
| H                     | -1.68937600 | 2.08394100  | -3.63623800 | O                     | -5.66672600 | -0.64503100 | -0.38590400 |
| H                     | 5.21293600  | -2.54692900 | 0.58496700  | C                     | -6.87822200 | -0.74619400 | -0.51958900 |
| H                     | -5.29195700 | -2.13149900 | 1.18940500  | C                     | -7.65408100 | -1.85510100 | 0.15714800  |
| H                     | -1.88219400 | -2.46579800 | -2.50745000 | C                     | -7.66092700 | 0.23251000  | -1.36741600 |
| H                     | -1.46719400 | -4.17345500 | -2.70060800 | H                     | -8.28538300 | 0.85857600  | -0.71646100 |
| H                     | 0.79732100  | -3.05332000 | -3.94868000 | H                     | -8.34079900 | -0.29435700 | -2.04705400 |
| H                     | 1.07543300  | -4.53107000 | -3.02461100 | H                     | 0.33482500  | 3.07995400  | 3.45073900  |
| H                     | 2.10188800  | -3.10421100 | -2.73646600 | H                     | -0.91012600 | 4.31425900  | 3.76890700  |
| H                     | 2.47258500  | 2.87523100  | 2.69303900  | H                     | -3.47775400 | 1.93153100  | 2.62174800  |
| H                     | 1.60097900  | 4.38881800  | 3.04318600  | H                     | 2.12410800  | -2.08300600 | -2.60872900 |

|                                           |             |             |             |                        |             |             |             |
|-------------------------------------------|-------------|-------------|-------------|------------------------|-------------|-------------|-------------|
| H                                         | 1.21104000  | 2.92567400  | 3.95007500  | H                      | -1.06174100 | 2.71267200  | 4.49475000  |
| H                                         | -1.57946900 | 2.61278900  | 2.52626700  | H                      | 1.00318700  | -2.12860400 | -3.99321200 |
|                                           |             |             |             | H                      | 1.52862400  | -3.63760500 | -3.24355800 |
|                                           |             |             |             | H                      | -1.91407700 | -2.41178600 | -2.87230300 |
|                                           |             |             |             | H                      | -8.53541600 | -1.45700300 | 0.67351200  |
|                                           |             |             |             | H                      | -8.02191800 | -2.55768700 | -0.60219300 |
|                                           |             |             |             | H                      | -7.01603800 | -2.39112300 | 0.86241600  |
|                                           |             |             |             | H                      | -6.98282700 | 0.87238400  | -1.93539500 |
| <b>TS(lc<sub>m</sub>-llc<sub>m</sub>)</b> |             |             |             | <b>llc<sub>m</sub></b> |             |             |             |
| C                                         | 1.19260500  | 3.75087000  | -3.48382600 | C                      | -0.29933500 | -3.55539400 | -3.67782400 |
| C                                         | -4.89649100 | 1.84731600  | -1.42258600 | C                      | 3.19714400  | -1.10740300 | -2.50410300 |
| C                                         | -4.01540400 | 0.76768200  | -1.39993400 | C                      | 2.47979700  | -0.08998100 | -1.86775900 |
| C                                         | -5.83511700 | 2.00606800  | -0.39872700 | C                      | 4.33834200  | -1.64561400 | -1.90267600 |
| C                                         | 1.82784400  | 3.09956000  | -2.28541600 | C                      | -0.94064100 | -2.80441700 | -2.54176200 |
| C                                         | 3.30161300  | 2.79022500  | -2.32163200 | C                      | -2.22071300 | -2.05593000 | -2.80949400 |
| C                                         | -5.89665000 | 1.07096700  | 0.63670800  | C                      | 4.76373200  | -1.14280500 | -0.66803600 |
| C                                         | -4.05742800 | -0.17235700 | -0.35215800 | C                      | 2.87761200  | 0.40160900  | -0.61672600 |
| C                                         | 0.24607600  | -1.56040800 | 3.31609500  | C                      | 2.15468400  | -0.72499400 | 4.35277700  |
| C                                         | -1.06828900 | -1.07478100 | 2.76304700  | C                      | 1.49992100  | 0.14675600  | 3.31382000  |
| C                                         | -5.02131800 | -0.01402600 | 0.65702100  | C                      | 4.04231400  | -0.12630500 | -0.03419300 |
| C                                         | -2.21528400 | -0.85962500 | 3.71347200  | C                      | 0.42902600  | 1.10075700  | 3.76708600  |
| C                                         | -0.08440800 | 3.33133700  | 2.13217600  | C                      | -0.14939700 | -4.05610000 | 1.99117300  |
| C                                         | 2.68073500  | 4.91016100  | 1.05271100  | C                      | -3.03246500 | -4.37380200 | 0.31720400  |
| C                                         | 2.90834600  | 1.88838200  | 2.52492300  | C                      | -2.40507400 | -1.62291300 | 2.20656500  |
| H                                         | -4.86103400 | 2.55678600  | -2.24500200 | H                      | 2.86835600  | -1.47318800 | -3.47326200 |
| H                                         | -3.30560800 | 0.61932400  | -2.20904600 | H                      | 1.60176900  | 0.34489400  | -2.33163600 |
| H                                         | -6.52133900 | 2.84815200  | -0.41397500 | H                      | 4.90271400  | -2.43145600 | -2.39798400 |
| H                                         | 3.77820700  | 3.07102000  | -1.37901400 | H                      | -2.88554500 | -2.09546000 | -1.94416800 |
| H                                         | 3.45816700  | 1.71189700  | -2.46062600 | H                      | -2.00968000 | -0.99851800 | -3.02521700 |
| H                                         | 0.72557600  | -2.24370400 | 2.60883300  | H                      | 2.93500900  | -1.34878100 | 3.90861300  |
| H                                         | 0.10399400  | -2.07272300 | 4.27379600  | H                      | 1.41160000  | -1.37575300 | 4.83171800  |
| H                                         | -6.62777800 | 1.18679000  | 1.43174800  | H                      | 5.66489000  | -1.53383800 | -0.20192800 |
| H                                         | -5.07710200 | -0.72657000 | 1.47309600  | H                      | 4.38607400  | 0.24706500  | 0.92346600  |
| H                                         | 2.12808600  | 5.53082900  | 0.33223100  | H                      | -2.60978900 | -5.07040600 | -0.42148400 |
| H                                         | 3.70382900  | 4.80702200  | 0.66081400  | H                      | -3.87631500 | -3.86618900 | -0.17362700 |
| H                                         | 2.76375200  | 5.50631800  | 1.97368300  | H                      | -3.46900900 | -4.99610700 | 1.11238900  |
| N                                         | 1.05999500  | 2.82896000  | -1.29121700 | N                      | -0.33779200 | -2.84201400 | -1.40762600 |
| N                                         | -1.26502300 | -0.81630700 | 1.51170700  | N                      | 1.90785800  | -0.00818100 | 2.10223000  |
| O                                         | -0.21487400 | -0.95179500 | 0.66283200  | O                      | 1.17506300  | 0.75974700  | 1.16711200  |
| O                                         | 1.69811300  | 2.17764300  | -0.21994900 | O                      | -0.94464400 | -2.09048700 | -0.38180600 |
| Al                                        | -0.32104000 | -2.29120800 | -1.28836600 | Al                     | 0.01191200  | 3.46232200  | -1.02057500 |
| Al                                        | 1.79801300  | 3.15121700  | 1.39521900  | Al                     | -1.67701800 | -3.10110700 | 1.04343700  |
| K                                         | -1.00210300 | 1.44883000  | -0.15458500 | K                      | 1.66890300  | -2.29699700 | 0.34526400  |
| K                                         | 2.32800400  | -0.37113400 | 0.38287400  | K                      | -1.37547600 | 0.54580700  | -0.03810200 |
| H                                         | 3.21641800  | 2.41689600  | 3.43961600  | H                      | -2.82382100 | -2.05470100 | 3.12824900  |
| H                                         | 2.39069400  | 0.98270400  | 2.88299900  | H                      | -1.64182700 | -0.90174100 | 2.54345000  |
| H                                         | 3.84989200  | 1.57072200  | 2.04563900  | H                      | -3.22442800 | -1.04981500 | 1.74674800  |
| H                                         | -0.79338200 | 3.84884900  | 1.46323700  | H                      | 0.47962000  | -4.69476300 | 1.34765600  |
| H                                         | -0.55048300 | 2.38685300  | 2.46096400  | H                      | 0.51663600  | -3.41811800 | 2.59890600  |
| H                                         | -0.04129200 | 3.95787400  | 3.03588900  | H                      | -0.60284600 | -4.75067700 | 2.71412700  |
| C                                         | -3.08051600 | -1.30335300 | -0.36194100 | C                      | 2.01177400  | 1.47311600  | 0.07406100  |
| C                                         | -3.43514900 | -2.61442600 | 0.30284800  | C                      | 2.83164600  | 2.54880300  | 0.80839300  |
| H                                         | -2.52375200 | -3.20944800 | 0.39120100  | H                      | 2.10449500  | 3.24600000  | 1.23862400  |
| H                                         | -3.80413900 | -2.43395100 | 1.31642000  | H                      | 3.36321000  | 2.08804900  | 1.64980100  |
| O                                         | -2.07217800 | -1.18754500 | -1.08423900 | O                      | 1.06556600  | 1.93499800  | -0.75478800 |
| C                                         | -4.49595600 | -3.38354700 | -0.51276900 | C                      | 3.82540300  | 3.30508700  | -0.08152800 |
| H                                         | -5.43119600 | -2.81908600 | -0.59236500 | H                      | 4.61616800  | 2.64613700  | -0.45639500 |
| H                                         | -4.13144800 | -3.59666700 | -1.52173700 | H                      | 3.32375700  | 3.75723400  | -0.94023000 |
| H                                         | -4.71619000 | -4.33744700 | -0.02259200 | H                      | 4.30413300  | 4.10876500  | 0.48915400  |
| C                                         | 0.62034100  | -3.62489000 | -0.08943500 | C                      | -0.84964300 | 3.94383400  | 0.74878200  |
| H                                         | 0.94712100  | -4.49332600 | -0.68281400 | H                      | -1.57683100 | 4.75585400  | 0.58487400  |
| H                                         | 1.50700200  | -3.23898200 | 0.43812000  | H                      | -1.40639100 | 3.14500100  | 1.26871300  |
| H                                         | -0.03905800 | -4.02217500 | 0.69767300  | H                      | -0.12853300 | 4.33411100  | 1.48316900  |
| C                                         | -1.25250700 | -3.46062400 | -2.65202700 | C                      | 1.04467400  | 4.97518800  | -1.81824800 |
| H                                         | -1.88451400 | -2.91337700 | -3.36827100 | H                      | 1.65064400  | 4.67399800  | -2.68560700 |
| H                                         | -0.49886600 | -3.99520000 | -3.25278100 | H                      | 0.34701000  | 5.74297400  | -2.18735800 |
| H                                         | -1.88448700 | -4.24686500 | -2.20914700 | H                      | 1.72056700  | 5.48837800  | -1.11999400 |
| C                                         | 0.84055700  | -0.98058500 | -2.31208400 | C                      | -1.35044700 | 2.70620100  | -2.32695700 |
| H                                         | 0.94220100  | 0.05795600  | -1.96425500 | H                      | -0.96950100 | 1.83589900  | -2.88804300 |
| H                                         | 1.86469100  | -1.37323500 | -2.44049300 | H                      | -2.32826900 | 2.42123000  | -1.90502300 |
| H                                         | 0.43512200  | -0.91010300 | -3.33206200 | H                      | -1.57847900 | 3.46632300  | -3.08905300 |
| H                                         | 1.66567400  | 4.71909000  | -3.69325500 | H                      | -0.97684600 | -4.33137500 | -4.05698600 |
| H                                         | 1.32380400  | 3.12956400  | -4.38001100 | H                      | -0.08447200 | -2.88231200 | -4.51891000 |
| H                                         | 0.12372700  | 3.91146100  | -3.31808100 | H                      | 0.63111600  | -4.03000200 | -3.35497500 |
| H                                         | 3.79197800  | 3.31157700  | -3.14922100 | H                      | -2.73546900 | -2.46796100 | -3.68299000 |
| H                                         | -3.09131200 | -0.47572700 | 3.18277400  | H                      | 0.27154100  | 1.89775400  | 3.03946400  |

|                                            |             |             |             |                        |             |             |             |
|--------------------------------------------|-------------|-------------|-------------|------------------------|-------------|-------------|-------------|
| H                                          | -2.49074600 | -1.79233400 | 4.22603400  | H                      | -0.52011300 | 0.56446800  | 3.90123600  |
| H                                          | -1.94741500 | -0.13774100 | 4.49762300  | H                      | 0.69439800  | 1.53050900  | 4.73919500  |
| H                                          | 0.93270300  | -0.72058900 | 3.49688700  | H                      | 2.59948100  | -0.10920700 | 5.14430500  |
| O                                          | 4.56708200  | -1.80948000 | 0.17579500  | O                      | -4.00600700 | 1.10436100  | 0.04268200  |
| C                                          | 5.29183900  | -2.76848100 | -0.05408000 | C                      | -5.03005400 | 1.76612400  | 0.13952400  |
| C                                          | 4.73652400  | -4.07546600 | -0.57465100 | C                      | -4.99024900 | 3.26870700  | 0.31117400  |
| H                                          | 4.97607200  | -4.16229100 | -1.64327700 | H                      | -3.97465800 | 3.60554500  | 0.52795700  |
| H                                          | 5.20282900  | -4.93170500 | -0.07434400 | H                      | -5.33127100 | 3.74515500  | -0.61770000 |
| H                                          | 3.65170600  | -4.11143000 | -0.45382500 | H                      | -5.67514000 | 3.59152100  | 1.10402600  |
| C                                          | 6.78701300  | -2.68596700 | 0.16444400  | C                      | -6.39262700 | 1.10900700  | 0.08644200  |
| H                                          | 7.08366100  | -1.65828300 | 0.38292300  | H                      | -6.29649800 | 0.05727500  | -0.18975900 |
| H                                          | 7.06774000  | -3.33034200 | 1.00790300  | H                      | -6.87066200 | 1.18056600  | 1.07216600  |
| H                                          | 7.32991400  | -3.05807400 | -0.71249500 | H                      | -7.04836500 | 1.62770500  | -0.62294900 |
| <b>TS(IIC<sub>m</sub>-IIC<sub>m</sub>)</b> |             |             |             | <b>IIC<sub>m</sub></b> |             |             |             |
| C                                          | -2.73749800 | -0.26101600 | 3.88819300  | C                      | -0.42309700 | -2.95079200 | -3.76278100 |
| C                                          | -4.70101000 | 0.62581500  | 0.24278500  | C                      | 3.95921800  | -1.28952300 | -2.52028900 |
| C                                          | -3.47733500 | 1.23074900  | -0.04365100 | C                      | 3.37017900  | -0.18523100 | -1.90091100 |
| C                                          | -5.28532300 | -0.25066200 | -0.67444200 | C                      | 5.02402800  | -1.95840600 | -1.90987200 |
| C                                          | -1.34958200 | -0.45455700 | 3.33964100  | C                      | -1.18811000 | -2.33907800 | -2.62026100 |
| C                                          | -0.19704100 | 0.21613100  | 4.04041900  | C                      | -2.57728600 | -1.81956100 | -2.88099900 |
| C                                          | -4.64164600 | -0.51132700 | -1.88919900 | C                      | 5.49657600  | -1.50782800 | -0.67445600 |
| C                                          | -2.82099300 | 0.98072600  | -1.26194800 | C                      | 3.83905800  | 0.28405600  | -0.65824800 |
| C                                          | 2.12363700  | -2.13055800 | -3.50345400 | C                      | -0.20926200 | 0.74682000  | 4.65116300  |
| C                                          | 0.69691800  | -2.58557700 | -3.34635500 | C                      | 0.73947600  | -0.15474600 | 3.90850100  |
| C                                          | -3.42439600 | 0.10275200  | -2.18466100 | C                      | 4.90775900  | -0.40454300 | -0.05395900 |
| C                                          | 0.25282300  | -3.84008900 | -4.04790700 | C                      | 1.36469200  | -1.30855600 | 4.64301800  |
| C                                          | -0.08570000 | -4.34699500 | 0.92991600  | C                      | -0.32908800 | -3.71989100 | 1.70973500  |
| C                                          | 1.03673900  | -3.42726500 | 3.94176800  | C                      | -3.24465300 | -4.12516300 | 0.09814100  |
| C                                          | 2.73068700  | -2.56580700 | 1.15035500  | C                      | -2.81796900 | -1.49927900 | 2.15219600  |
| H                                          | -5.19653000 | 0.83818600  | 1.18588900  | H                      | 3.58771800  | -1.62378900 | -3.48582700 |
| H                                          | -3.01610900 | 1.90157700  | 0.67156600  | H                      | 2.54379100  | 0.32797800  | -2.38308400 |
| H                                          | -6.23725100 | -0.72404800 | -0.44943400 | H                      | 5.47919900  | -2.82015900 | -2.39044000 |
| H                                          | 0.65330400  | -0.46485000 | 4.12255000  | H                      | -3.23475500 | -2.02315200 | -2.03340000 |
| H                                          | 0.13291100  | 1.09671200  | 3.47338500  | H                      | -2.54218400 | -0.73194300 | -3.03253500 |
| H                                          | 2.17578600  | -1.04072600 | -3.57041000 | H                      | -0.15100000 | 1.76808300  | 4.26813400  |
| H                                          | 2.58523800  | -2.57947100 | -4.38851700 | H                      | 0.00799900  | 0.73723900  | 5.72354700  |
| H                                          | -5.09116800 | -1.18741200 | -2.61165200 | H                      | 6.31911100  | -2.02365300 | -0.18522100 |
| H                                          | -2.93723700 | -0.12514900 | -3.12610800 | H                      | 5.26360400  | -0.07969200 | 0.91957500  |
| H                                          | 0.04820600  | -3.48792500 | 4.42050000  | H                      | -2.80981800 | -4.73962900 | -0.70378400 |
| H                                          | 1.63132000  | -2.71577000 | 4.53431800  | H                      | -4.13965300 | -3.64276000 | -0.32331900 |
| H                                          | 1.50691900  | -4.41165700 | 4.08601700  | H                      | -3.60900600 | -4.83118500 | 0.85965500  |
| N                                          | -1.23426600 | -1.17990300 | 2.28530200  | N                      | -0.58589900 | -2.27930000 | -1.48690000 |
| N                                          | -0.17674100 | -1.97521800 | -2.62218600 | N                      | 1.05390300  | -0.01601400 | 2.67104000  |
| O                                          | 0.30129200  | -0.85084900 | -1.94675100 | O                      | 0.38196700  | 1.06408800  | 2.05114400  |
| O                                          | 0.07896200  | -1.28817100 | 1.78368500  | O                      | -1.31493300 | -1.65362400 | -0.45282100 |
| Al                                         | -0.43623000 | 3.76950400  | 0.47433200  | Al                     | 0.83438400  | 2.68966900  | -1.25066200 |
| Al                                         | 0.93979500  | -2.95881400 | 2.00121100  | Al                     | -1.94961800 | -2.82425300 | 0.88985900  |
| K                                          | -1.62266300 | -2.01190500 | -0.27736400 | K                      | 1.38082400  | -1.51058000 | 0.23544900  |
| K                                          | 1.53061800  | 0.23891000  | 0.14621900  | K                      | -1.87827900 | 0.86123000  | 0.23934100  |
| H                                          | 3.38901700  | -3.43602000 | 1.29444000  | H                      | -3.23573500 | -2.04579400 | 3.01127100  |
| H                                          | 2.70271200  | -2.40165400 | 0.06062000  | H                      | -2.13017000 | -0.75574000 | 2.58668400  |
| H                                          | 3.27040800  | -1.71730300 | 1.60356700  | H                      | -3.67117200 | -0.95480400 | 1.71407800  |
| H                                          | -1.15509500 | -4.43893000 | 1.18728900  | H                      | 0.32416700  | -4.20337400 | 0.96416700  |
| H                                          | -0.00074200 | -4.25803400 | -0.16631800 | H                      | 0.29559100  | -3.06584400 | 2.33948900  |
| H                                          | 0.34410900  | -5.33162100 | 1.16799100  | H                      | -0.65734400 | -4.53291400 | 2.37423000  |
| C                                          | -1.48968700 | 1.62342900  | -1.50900100 | C                      | 3.17042400  | 1.43781100  | 0.01249100  |
| C                                          | -0.80138700 | 1.41900400  | -2.73877900 | C                      | 3.86407000  | 2.32413400  | 0.75427700  |
| H                                          | -1.44619600 | 1.20068300  | -3.59047500 | H                      | 4.94386300  | 2.20211000  | 0.79344900  |
| O                                          | -0.92309200 | 2.17680700  | -0.50529500 | O                      | 1.81333600  | 1.48084900  | -0.16201700 |
| C                                          | 0.40098500  | 2.28266900  | -3.09011200 | C                      | 3.28982600  | 3.49012000  | 1.50188600  |
| H                                          | 0.10164700  | 3.28549000  | -3.41778400 | H                      | 3.57825300  | 4.44475600  | 1.03994500  |
| H                                          | 1.07232000  | 2.41328800  | -2.23586200 | H                      | 2.19822800  | 3.45459700  | 1.53520800  |
| H                                          | 0.97367300  | 1.81948100  | -3.90097900 | H                      | 3.66300500  | 3.51476200  | 2.53499700  |
| C                                          | 1.44455600  | 3.35638500  | 1.07343100  | C                      | -0.40532200 | 3.67049100  | 0.02927700  |
| H                                          | 1.85968100  | 4.25662100  | 1.55207800  | H                      | -1.41152700 | 3.82011800  | -0.39776800 |
| H                                          | 1.51782000  | 2.56442000  | 1.83749300  | H                      | -0.53628000 | 3.24516600  | 1.03701400  |
| H                                          | 2.13763700  | 3.10956700  | 0.25425200  | H                      | -0.00991800 | 4.68248000  | 0.20006700  |
| C                                          | -0.58941000 | 5.25244400  | -0.84957100 | C                      | 2.10004700  | 3.87472900  | -2.23258700 |
| H                                          | -1.57035000 | 5.27395400  | -1.34674200 | H                      | 2.82686900  | 3.31892100  | -2.84253600 |
| H                                          | -0.47450600 | 6.23045000  | -0.35903300 | H                      | 1.55646000  | 4.53368500  | -2.92684200 |
| H                                          | 0.16943500  | 5.21048700  | -1.64357500 | H                      | 2.68256000  | 4.53317100  | -1.57352600 |
| C                                          | -1.71793700 | 3.83446400  | 2.01027200  | C                      | -0.23661400 | 1.47465800  | -2.47463000 |
| H                                          | -1.74328500 | 2.89950100  | 2.59085400  | H                      | -0.41127700 | 0.44538100  | -2.12693200 |
| H                                          | -1.42515300 | 4.62392600  | 2.71901700  | H                      | -1.22147400 | 1.90741700  | -2.71948300 |
| H                                          | -2.75416700 | 4.06055000  | 1.71896200  | H                      | 0.28341900  | 1.36741900  | -3.43866300 |
| H                                          | -2.80101000 | -0.63892700 | 4.91691700  | H                      | -0.95499500 | -3.82563600 | -4.15850300 |

|                                           |             |             |             |                      |             |             |              |
|-------------------------------------------|-------------|-------------|-------------|----------------------|-------------|-------------|--------------|
| H                                         | -2.99237300 | 0.80671400  | 3.92334900  | H                    | -0.32401500 | -2.23420200 | -4.58906800  |
| H                                         | -3.47652700 | -0.78384500 | 3.27504500  | H                    | 0.57457600  | -3.26102300 | -3.44084900  |
| H                                         | -0.49158800 | 0.55456500  | 5.03821500  | H                    | -2.99758800 | -2.26947700 | -3.78586000  |
| H                                         | -0.79874200 | -4.05175600 | -3.83499800 | H                    | 2.04593000  | -1.86773700 | 3.99680900   |
| H                                         | 0.38248100  | -3.74866500 | -5.13456700 | H                    | 1.92090300  | -0.94676700 | 5.51694200   |
| H                                         | 0.85670000  | -4.69979200 | -3.72719400 | H                    | 0.59062400  | -1.99380800 | 5.01116400   |
| H                                         | 2.71612000  | -2.42584300 | -2.62685500 | H                    | -1.24232000 | 0.39922800  | 4.51750800   |
| O                                         | 4.07684700  | 0.88551300  | -0.40759900 | O                    | -4.34119800 | 1.71651000  | -0.21881400  |
| C                                         | 5.18178300  | 1.31532300  | -0.10614400 | C                    | -5.48883400 | 2.05357800  | -0.47585300  |
| C                                         | 6.40808800  | 0.95873600  | -0.91728300 | C                    | -6.66714400 | 1.18062400  | -0.10428100  |
| H                                         | 6.78635000  | 1.85604900  | -1.42424800 | H                    | -7.44444600 | 1.76676700  | 0.39970400   |
| H                                         | 7.21303800  | 0.60015900  | -0.26453200 | H                    | -7.11977100 | 0.77303400  | -1.01783600  |
| H                                         | 6.16283900  | 0.19839800  | -1.66112900 | H                    | -6.34519000 | 0.35549600  | 0.53385800   |
| C                                         | 5.37963200  | 2.21125400  | 1.09786400  | C                    | -5.78546200 | 3.35947500  | -1.17957200  |
| H                                         | 6.10045400  | 3.00955500  | 0.88963900  | H                    | -6.29968400 | 4.03879000  | -0.48721000  |
| H                                         | 4.42566700  | 2.63822300  | 1.41592600  | H                    | -4.86039500 | 3.82761500  | -1.52126500  |
| H                                         | 5.79328800  | 1.61202500  | 1.92066600  | H                    | -6.46218900 | 3.19991600  | -2.02734700  |
| H                                         | -0.31499400 | 0.24002700  | -2.41737000 | H                    | 0.98123600  | 1.29742700  | 1.28240900   |
| <b>TS(IIIc<sub>m</sub>-2<sub>m</sub>)</b> |             |             |             | <b>2<sub>m</sub></b> |             |             |              |
| C                                         | -0.79974700 | 3.56616900  | -2.79411900 | C                    | 0.37734400  | 2.33947300  | -4.05212300  |
| C                                         | -4.82415200 | -0.52443200 | 2.33757300  | C                    | -6.02150200 | 0.77179000  | -1.30933800  |
| C                                         | -4.10949700 | -0.77046100 | 1.16340800  | C                    | -4.99078900 | -0.04424200 | -1.77535900  |
| C                                         | -5.74695000 | 0.52102100  | 2.39518500  | C                    | -6.12917200 | 1.06583700  | 0.05197200   |
| C                                         | 0.37647700  | 2.97275400  | -2.06728300 | C                    | 1.19411100  | 2.10576200  | -2.81003300  |
| C                                         | 1.72320400  | 2.96562200  | -2.74550800 | C                    | 2.66990400  | 1.83380100  | -2.95385700  |
| C                                         | -5.94264000 | 1.32232000  | 1.26696700  | C                    | -5.19468000 | 0.53191000  | 0.94247300   |
| C                                         | -4.30384700 | 0.01977500  | 0.01471900  | C                    | -4.04854200 | -0.59958600 | -0.89123100  |
| C                                         | 1.97064900  | -2.75202900 | 2.78657400  | C                    | 0.45223400  | -1.32960900 | 4.16896900   |
| C                                         | 0.77527200  | -1.87630300 | 3.06016900  | C                    | -0.62585000 | -0.46568000 | 3.56819400   |
| C                                         | -5.22528000 | 1.08116400  | 0.09673600  | C                    | -4.16455400 | -0.28816400 | 0.47719800   |
| C                                         | 0.45637500  | -1.54305000 | 4.49301900  | C                    | -1.48831900 | 0.35376600  | 4.48958100   |
| C                                         | 0.47870800  | 2.81768000  | 2.65202700  | C                    | -0.19353300 | 3.86443100  | 1.35865700   |
| C                                         | 2.59169600  | 4.60452500  | 0.73610100  | C                    | 2.61242400  | 4.75664900  | -0.27158600  |
| C                                         | 3.44099500  | 1.52573000  | 1.78419900  | C                    | 2.68396900  | 2.37134200  | 2.11285500   |
| H                                         | -4.66102600 | -1.15713300 | 3.20663200  | H                    | -6.73606800 | 1.18970000  | -2.01418100  |
| H                                         | -3.39783600 | -1.58869700 | 1.12565500  | H                    | -4.89838400 | -0.24295200 | -2.83908500  |
| H                                         | -6.30280700 | 0.71437700  | 3.30868500  | H                    | -6.93015300 | 1.70495300  | 0.41390500   |
| H                                         | 2.50066000  | 3.31540400  | -2.06108300 | H                    | 3.03052000  | 2.15030700  | -3.93740100  |
| H                                         | 1.99441400  | 1.94736200  | -3.05661600 | H                    | 3.23594100  | 2.35010400  | -2.17491100  |
| H                                         | 1.91861500  | -3.17430100 | 1.78175200  | H                    | 0.56597900  | -2.25622100 | 3.60175400   |
| H                                         | 2.03239300  | -3.56095800 | 3.52357400  | H                    | 0.22633200  | -1.56210900 | 5.21423400   |
| H                                         | -6.64778600 | 2.14898100  | 1.30259300  | H                    | -5.27235000 | 0.74549800  | 2.00606900   |
| H                                         | -5.36428900 | 1.73442500  | -0.75931700 | H                    | -3.44877300 | -0.70676100 | 1.17872000   |
| H                                         | 1.80551800  | 5.22507000  | 0.28137200  | H                    | 2.06764500  | 5.16086000  | -1.13742400  |
| H                                         | 3.42511500  | 4.57489200  | 0.01741800  | H                    | 3.59979000  | 4.43905900  | -0.64042400  |
| H                                         | 2.95897100  | 5.16697400  | 1.60756200  | H                    | 2.79596600  | 5.60833100  | 0.40019200   |
| N                                         | 0.15722100  | 2.49440700  | -0.89532900 | N                    | 0.57028200  | 2.14291600  | -1.68760000  |
| N                                         | 0.00865300  | -1.36907100 | 2.15799300  | N                    | -0.86026900 | -0.36756400 | 2.30779900   |
| O                                         | 0.36181900  | -1.65121800 | 0.83044700  | O                    | 0.01583300  | -1.10545800 | 1.49227500   |
| O                                         | 1.27975200  | 1.90923700  | -0.28087500 | O                    | 1.36264600  | 1.86484800  | -0.55917000  |
| Al                                        | -1.54396800 | -2.36897700 | -1.56245800 | Al                   | -0.71564400 | -2.35114900 | 0.32934100   |
| Al                                        | 1.93888600  | 2.78765700  | 1.25384400  | Al                   | 1.61614000  | 3.29386000  | 0.65383500   |
| K                                         | -1.13218500 | 0.79384200  | 0.84993700  | K                    | -1.34471900 | 1.27083600  | 0.07193500   |
| K                                         | 2.37384600  | -0.46509800 | -0.39379500 | K                    | 2.36441000  | -0.28004900 | 0.57284800   |
| H                                         | 3.99277500  | 1.98263900  | 2.61948200  | H                    | 2.93654800  | 3.12814500  | 2.87070100   |
| H                                         | 3.12229300  | 0.53741200  | 2.15712800  | H                    | 2.13601000  | 1.58931500  | 2.66621800   |
| H                                         | 4.19197300  | 1.36699000  | 0.99175200  | H                    | 3.65558200  | 1.95354300  | 1.79750500   |
| H                                         | -0.46120300 | 3.27863200  | 2.30580000  | H                    | -0.92434800 | 4.12580600  | 0.57546600   |
| H                                         | 0.23705100  | 1.83546900  | 3.09060200  | H                    | -0.67084400 | 3.14805700  | 2.04833200   |
| H                                         | 0.80757200  | 3.43856000  | 3.49893100  | H                    | -0.06501100 | 4.78502900  | 1.94741900   |
| C                                         | -3.51634600 | -0.25690800 | -1.22430800 | C                    | -2.93298500 | -1.46948700 | -1.37362800  |
| C                                         | -3.96386600 | 0.09331800  | -2.44958600 | C                    | -3.10600500 | -2.31899600 | -2.40858600  |
| H                                         | -4.96376000 | 0.51293200  | -2.51671800 | H                    | -4.10579100 | -2.39556500 | -2.82792800  |
| O                                         | -2.30764300 | -0.83347400 | -0.99498100 | O                    | -1.76155700 | -1.29132900 | -0.171341500 |
| C                                         | -3.21486900 | -0.06207600 | -3.73909000 | C                    | -2.04660300 | -3.18911200 | -3.01694800  |
| H                                         | -3.27939000 | 0.85588300  | -4.33944600 | H                    | -2.07364600 | -3.13030500 | -4.11382200  |
| H                                         | -2.15561200 | -0.27681200 | -3.56805300 | H                    | -1.04745300 | -2.89255700 | -2.68711300  |
| H                                         | -3.62353800 | -0.87232400 | -4.35953700 | H                    | -2.18329400 | -4.24978300 | -2.75867100  |
| C                                         | -1.30549600 | -3.60077800 | 0.24571500  | C                    | -1.76151800 | -3.74492700 | 1.27507400   |
| H                                         | -2.39392100 | -3.72766500 | 0.16750000  | H                    | -2.50783200 | -3.31932300 | 1.96077900   |
| H                                         | -0.83099200 | -4.45768000 | -0.25035200 | H                    | -2.31140100 | -4.39603900 | 0.58150900   |
| H                                         | -1.11232200 | -3.73011900 | 1.31950500  | H                    | -1.11747800 | -4.40197900 | 1.87775500   |
| C                                         | -2.77544100 | -3.53895400 | -2.58405900 | C                    | 0.94447400  | -2.94515800 | -0.64245300  |
| H                                         | -2.86538100 | -3.21802100 | -3.63074000 | H                    | 0.74307400  | -3.86206300 | -1.21354500  |
| H                                         | -2.42363300 | -4.58030200 | -2.60591600 | H                    | 1.33200400  | -2.21848300 | -1.37553000  |
| H                                         | -3.79326300 | -3.55600500 | -2.17080200 | H                    | 1.76465500  | -3.20046000 | 0.04842100   |



|                                         |             |             |             |                                          |             |             |             |
|-----------------------------------------|-------------|-------------|-------------|------------------------------------------|-------------|-------------|-------------|
| C                                       | 0.24562500  | -2.00858700 | -2.38573300 | H                                        | 0.44331300  | 1.47772800  | -4.73005000 |
| H                                       | 0.47628700  | -0.93251400 | -2.39553300 | H                                        | 0.75324000  | 3.21085500  | -4.60394000 |
| H                                       | 1.05887700  | -2.54587700 | -1.87580900 | H                                        | 2.87448500  | 0.75786300  | -2.85741000 |
| H                                       | 0.26611900  | -2.33734500 | -3.43371400 | H                                        | -0.67273500 | 2.50831300  | -3.79956000 |
| H                                       | -0.61685700 | 4.62380500  | -3.02545800 | H                                        | -0.87345000 | 1.03506100  | 5.09254000  |
| H                                       | -0.96553600 | 3.05263400  | -3.75064800 | H                                        | -2.03015200 | -0.29448500 | 5.19053100  |
| H                                       | -1.70821500 | 3.48733200  | -2.19157400 | H                                        | -2.21259800 | 0.94557000  | 3.92367100  |
| H                                       | 1.71498600  | 3.59693500  | -3.63904200 | H                                        | 1.41859400  | -0.80583700 | 4.15128500  |
| H                                       | -0.42319000 | -0.89688200 | 4.55230000  | O                                        | 4.72191100  | -1.39522700 | 0.02496600  |
| H                                       | 0.26751800  | -2.45568800 | 5.07364400  | C                                        | 5.54167000  | -2.16938600 | -0.45129400 |
| H                                       | 1.30171600  | -1.02936500 | 4.97016900  | C                                        | 7.02213500  | -1.85962800 | -0.41309200 |
| H                                       | 2.89926800  | -2.16979500 | 2.87686800  | H                                        | 7.58353200  | -2.70178600 | 0.00872300  |
| O                                       | 4.82722800  | -1.33471800 | -0.98071100 | H                                        | 7.39428800  | -1.71172600 | -1.43514400 |
| C                                       | 6.04357400  | -1.44969300 | -0.90704700 | H                                        | 7.20599800  | -0.95685600 | 0.17247500  |
| C                                       | 6.85548800  | -0.65444500 | 0.09165200  | C                                        | 5.11810900  | -3.46917400 | -1.09926800 |
| H                                       | 7.47406400  | -1.32323800 | 0.70252500  | H                                        | 4.02956700  | -3.52955400 | -1.16458400 |
| H                                       | 7.54526100  | 0.01384900  | -0.43966100 | H                                        | 5.56044700  | -3.56507200 | -2.09820000 |
| H                                       | 6.20160500  | -0.06207800 | 0.73511000  | H                                        | 5.49297800  | -4.31420900 | -0.50712600 |
| C                                       | 6.79465600  | -2.39747400 | -1.81653300 |                                          |             |             |             |
| H                                       | 7.28001400  | -3.17998100 | -1.21945300 |                                          |             |             |             |
| H                                       | 6.11114100  | -2.85754700 | -2.53267100 |                                          |             |             |             |
| H                                       | 7.59251400  | -1.86685600 | -2.35014600 |                                          |             |             |             |
| H                                       | -0.50955400 | -2.46763200 | 0.40666700  |                                          |             |             |             |
| <b>TS(Ic<sub>m</sub>-2<sub>m</sub>)</b> |             |             |             | <b>TS(Ilc<sub>m</sub>-2<sub>m</sub>)</b> |             |             |             |
| C                                       | 3.81850000  | 3.28459600  | 2.14516500  | C                                        | 0.20652800  | -3.99786800 | -2.79347900 |
| C                                       | 2.84237100  | 0.06393800  | 2.37308900  | C                                        | 3.14455100  | -3.10667500 | 0.13754900  |
| C                                       | 0.69335300  | 2.53722500  | 3.12834000  | C                                        | 3.23399800  | -1.84377400 | -0.44690800 |
| C                                       | -2.76926200 | 0.22352200  | 3.68896800  | C                                        | 3.41787500  | -3.27178700 | 1.49988200  |
| C                                       | -3.95664500 | 2.98982900  | -1.76866200 | C                                        | -0.85744500 | -3.06302400 | -2.28393600 |
| C                                       | -2.89993900 | 2.10379400  | -1.98896500 | C                                        | -1.87474800 | -2.52951400 | -3.25920300 |
| C                                       | -5.18004600 | 2.51429900  | -1.28817000 | C                                        | 3.79288700  | -2.16522000 | 2.26921700  |
| C                                       | -1.75131100 | -0.66117800 | 3.01348100  | C                                        | 3.61402900  | -0.72332500 | 0.31661600  |
| C                                       | -0.77924300 | -1.39558000 | 3.89363600  | C                                        | -0.21960900 | 3.03517600  | 3.07058600  |
| C                                       | -5.33920700 | 1.14808500  | -1.04359800 | C                                        | 0.41077400  | 1.69248300  | 3.32770500  |
| C                                       | -3.04895000 | 0.72601500  | -1.74758300 | C                                        | 3.90217400  | -0.90560000 | 1.68178800  |
| C                                       | 3.18480700  | 2.75779000  | -1.86518700 | C                                        | 1.11329200  | 1.47420500  | 4.64092100  |
| C                                       | 1.94709200  | 3.44361000  | -1.34691100 | C                                        | -2.31962800 | -3.16588500 | 2.23154600  |
| C                                       | -4.28663700 | 0.26157700  | -1.27654000 | C                                        | -4.14729900 | -4.00139100 | -0.45534400 |
| C                                       | 1.46072500  | 4.68551400  | -2.04405600 | C                                        | -4.28151400 | -0.87060100 | 0.79655200  |
| C                                       | -3.02147600 | -3.49153500 | -0.73050700 | H                                        | 2.86010600  | -3.96198200 | -0.46853300 |
| C                                       | -2.08112300 | -4.21336000 | 2.21816200  | H                                        | 3.01938700  | -1.70671400 | -1.50043200 |
| C                                       | 0.32779400  | -4.00576200 | -0.20011700 | H                                        | 3.35100200  | -4.25631800 | 1.95536900  |
| H                                       | 4.67723900  | 2.99843700  | 1.51876600  | H                                        | -1.88064700 | -3.12099500 | -4.17994400 |
| H                                       | 3.53135500  | 4.30152800  | 1.84015800  | H                                        | -2.87361400 | -2.53444100 | -2.81701000 |
| H                                       | 4.20306900  | 3.36851200  | 3.17269400  | H                                        | -0.85366200 | 2.97864200  | 2.18316200  |
| H                                       | -3.82845100 | 4.04849500  | -1.98160300 | H                                        | 0.53905400  | 3.81416600  | 2.90373100  |
| H                                       | -1.94904400 | 2.46461800  | -2.37315000 | H                                        | 4.01281000  | -2.28570000 | 3.32623800  |
| H                                       | -6.00353200 | 3.20141100  | -1.11263400 | H                                        | 4.21464200  | -0.06557900 | 2.29128000  |
| H                                       | -0.35105300 | -0.70467500 | 4.62919400  | H                                        | -3.48746800 | -4.82945600 | -0.75402000 |
| H                                       | -1.29591400 | -2.18683100 | 4.45076700  | H                                        | -4.65421200 | -3.65702600 | -1.36956500 |
| H                                       | 3.83505500  | 2.45929000  | -1.03905900 | H                                        | -4.92878100 | -4.44639400 | 0.17870000  |
| H                                       | 3.73732600  | 3.41032300  | -2.54821000 | N                                        | -0.82494300 | -2.76702000 | -1.03323000 |
| H                                       | -6.28685400 | 0.77066000  | -0.66763200 | N                                        | 0.37827200  | 0.70141800  | 2.49555500  |
| H                                       | -4.41797300 | -0.79606800 | -1.07226500 | O                                        | -0.24085800 | 0.86812700  | 1.30079000  |
| H                                       | -2.97870600 | -3.72486800 | 2.62181100  | O                                        | -1.81546500 | -1.86050600 | -0.62048900 |
| H                                       | -1.36558800 | -4.29961000 | 3.04702100  | Al                                       | 2.23653100  | 1.84146500  | -2.35974800 |
| H                                       | -2.37508400 | -5.23859200 | 1.95314700  | Al                                       | -3.17243100 | -2.54173500 | 0.50239000  |
| N                                       | -1.80858300 | -0.70335700 | 1.72664400  | K                                        | 0.25350300  | -1.70275100 | 1.31910500  |
| N                                       | 1.25946300  | 3.03104800  | -0.34344000 | K                                        | -1.91306100 | 0.78811000  | -0.52377700 |
| O                                       | 1.72965800  | 1.84132900  | 0.23966500  | H                                        | -5.20581100 | -1.15239800 | 1.32316000  |
| O                                       | -0.85321700 | -1.53049300 | 1.09807900  | H                                        | -3.80059600 | -0.11094200 | 1.43461900  |
| Al                                      | 2.30541100  | 1.98483100  | 2.02778100  | H                                        | -4.61294600 | -0.38057800 | -0.13466900 |
| Al                                      | -1.28325400 | -3.24380600 | 0.68040100  | H                                        | -1.49466600 | -3.88626000 | 2.09836300  |
| K                                       | -1.01941200 | 1.81651100  | 0.55273100  | H                                        | -1.96766100 | -2.35886600 | 2.89599600  |
| K                                       | 1.37797700  | -0.73547900 | -0.42562500 | H                                        | -3.07730600 | -3.70729500 | 2.81764500  |
| H                                       | -0.07887800 | 1.75829800  | 3.24180200  | C                                        | 3.73855600  | 0.59546600  | -0.35439200 |
| H                                       | 1.01585100  | 2.77429700  | 4.15319500  | C                                        | 3.96806700  | 1.81330900  | 0.31770000  |
| H                                       | 0.20106000  | 3.45284500  | 2.75999300  | H                                        | 2.74049700  | 2.29180500  | -0.16086100 |
| H                                       | 0.17806300  | -5.07694500 | -0.39755000 | H                                        | 4.00319500  | 1.76267600  | 1.40373400  |
| H                                       | 0.59842800  | -3.55726800 | -1.16452400 | O                                        | 3.44913700  | 0.63003000  | -1.62304200 |
| H                                       | 1.20765300  | -3.94038100 | 0.45831000  | C                                        | 4.86298300  | 2.89667200  | -0.27683000 |
| H                                       | -3.39620800 | -3.71558300 | -1.73621800 | H                                        | 5.87640600  | 2.81675400  | 0.13574500  |
| H                                       | -2.77688400 | -4.49794400 | -0.35079400 | H                                        | 4.93395600  | 2.80926000  | -1.36310200 |
| H                                       | -3.86615400 | -3.11695100 | -0.14090000 | H                                        | 4.48837800  | 3.89958400  | -0.04229800 |
| H                                       | 2.01119600  | -0.65953300 | 2.38839400  | C                                        | 1.53020300  | 2.93725200  | -0.60358000 |
| H                                       | 3.59128600  | -0.30237100 | 1.65128000  | H                                        | 1.85551400  | 3.88570600  | -0.15954100 |

|                                            |             |             |             |                        |             |             |             |
|--------------------------------------------|-------------|-------------|-------------|------------------------|-------------|-------------|-------------|
| H                                          | 3.31901600  | -0.01848300 | 3.36145700  | H                      | 0.89866900  | 3.26838100  | -1.45417800 |
| C                                          | -1.86280000 | -0.17960400 | -1.98858800 | H                      | 0.86405000  | 2.40709000  | 0.09168200  |
| C                                          | -2.10540100 | -1.48735800 | -2.48136000 | C                      | 3.06910000  | 3.08499200  | -3.64814400 |
| H                                          | -2.35523500 | -2.42198900 | -1.30391700 | H                      | 3.77222100  | 3.80114700  | -3.20579700 |
| H                                          | -3.09161500 | -1.60492900 | -2.93571500 | H                      | 3.61886000  | 2.53747800  | -4.42651800 |
| O                                          | -0.71970500 | 0.29524800  | -1.70455200 | H                      | 2.30217200  | 3.67483600  | -4.17043400 |
| C                                          | -1.00667900 | -2.22738600 | -3.22245300 | C                      | 0.66108200  | 0.79094300  | -2.97552700 |
| H                                          | -0.01749000 | -1.96071600 | -2.83812500 | H                      | 0.86439900  | 0.31172900  | -3.94361600 |
| H                                          | -1.11502200 | -3.31672200 | -3.13183700 | H                      | 0.38997100  | -0.01845500 | -2.28300300 |
| H                                          | -1.00689300 | -1.98921500 | -4.29601600 | H                      | -0.22627100 | 1.42371900  | -3.13372300 |
| H                                          | 2.22897500  | 5.46941000  | -2.02029900 | H                      | 0.79884700  | -3.52256300 | -3.58721600 |
| H                                          | 0.55479000  | 5.06850500  | -1.56633900 | H                      | -0.24662100 | -4.89762900 | -3.22965600 |
| H                                          | 1.24605600  | 4.48052800  | -3.10179100 | H                      | -1.63385000 | -1.49205300 | -3.52866900 |
| H                                          | -3.44780000 | 0.66881500  | 2.95536300  | H                      | 0.87528100  | -4.30156100 | -1.98369000 |
| H                                          | 0.02391400  | -1.84445800 | 3.31072300  | H                      | 0.43272500  | 1.61733900  | 5.49341900  |
| H                                          | -3.36557200 | -0.35913400 | 4.40300300  | H                      | 1.94167100  | 2.18513900  | 4.78322900  |
| H                                          | -2.27656100 | 1.02152100  | 4.25923000  | H                      | 1.51736500  | 0.45780600  | 4.69056800  |
| H                                          | 2.91424400  | 1.84593600  | -2.41485600 | H                      | -0.81949600 | 3.35832100  | 3.93245700  |
| O                                          | 3.61144000  | -1.83571200 | -1.41834100 | O                      | -3.47255400 | 2.95837800  | -0.81040700 |
| C                                          | 4.71461000  | -2.36155900 | -1.46521300 | C                      | -4.38739400 | 3.62480300  | -3.24458600 |
| C                                          | 5.74274900  | -2.14485300 | -0.37634000 | C                      | -4.63549100 | 5.04300800  | -0.81184300 |
| H                                          | 6.19096200  | -3.09579400 | -0.06552000 | H                      | -4.72848000 | 5.72262300  | 0.04361300  |
| H                                          | 6.55836200  | -1.52215800 | -0.76728300 | H                      | -3.82741800 | 5.37381300  | -1.46716500 |
| H                                          | 5.29243700  | -1.64341700 | 0.48273400  | H                      | -5.58694100 | 5.08828200  | -1.35758000 |
| C                                          | 5.10628700  | -3.25763500 | -2.62049900 | C                      | -5.30864400 | 3.07551500  | 0.72252200  |
| H                                          | 4.36095200  | -3.19870700 | -3.41603000 | H                      | -6.35523600 | 3.31400500  | 0.50092200  |
| H                                          | 6.09571300  | -2.98859000 | -3.00834900 | H                      | -5.18262700 | 1.99525500  | 0.82661900  |
| H                                          | 5.17374700  | -4.29516700 | -2.26758200 | H                      | -5.06992100 | 3.55533900  | 1.68142800  |
| <b>TS(IIc<sub>m</sub>-IVc<sub>m</sub>)</b> |             |             |             | <b>IVc<sub>m</sub></b> |             |             |             |
| C                                          | 0.46977000  | 3.97383400  | -3.03709600 | C                      | 1.50048500  | 3.34399500  | -3.45518100 |
| C                                          | -3.63428800 | 2.53113400  | -1.36909600 | C                      | -3.27019500 | 2.64602200  | -1.98164800 |
| C                                          | -3.32954100 | 1.16907300  | -1.39707200 | C                      | -3.10197300 | 1.26226700  | -1.88469400 |
| C                                          | -4.19072600 | 3.10599800  | -0.22221700 | C                      | -3.86305600 | 3.36256200  | -0.93645300 |
| C                                          | 1.25213700  | 3.03788000  | -2.15553600 | C                      | 1.97818400  | 2.48685400  | -2.31389200 |
| C                                          | 2.49894500  | 2.40191700  | -2.71050800 | C                      | 3.18359000  | 1.61066800  | -2.52900900 |
| C                                          | -4.44658900 | 2.30124900  | 0.89462600  | C                      | -4.29292000 | 2.67300000  | 0.20381200  |
| C                                          | -3.57759800 | 0.34959700  | -0.28109400 | C                      | -3.53886800 | 0.55331500  | -0.74985400 |
| C                                          | 0.34716300  | -1.29332700 | 3.97361400  | C                      | -0.75797300 | -0.62904400 | 4.38719700  |
| C                                          | -0.92600300 | -1.80379200 | 3.35987100  | C                      | -1.80944200 | -1.13981200 | 3.45648100  |
| C                                          | -4.14761600 | 0.93797800  | 0.86449000  | C                      | -4.13336100 | 1.28811800  | 0.29409800  |
| C                                          | -1.72853400 | -2.85620400 | 4.07169500  | C                      | -2.92299600 | -2.02691500 | 3.92114000  |
| C                                          | 1.15346600  | 3.32696900  | 2.61585000  | C                      | 1.06183200  | 3.66513300  | 2.18992300  |
| C                                          | 3.74145100  | 4.02263400  | 0.61115100  | C                      | 4.09674600  | 3.58941000  | 0.77373600  |
| C                                          | 3.40547900  | 0.93689800  | 1.92543400  | C                      | 2.92421300  | 0.90246800  | 2.46074500  |
| H                                          | -3.43732400 | 3.14382000  | -2.24463800 | H                      | -2.93853100 | 3.16542900  | -2.87731100 |
| H                                          | -2.89000700 | 0.71932200  | -2.28018600 | H                      | -2.63182700 | 0.70328600  | -2.68603100 |
| H                                          | -4.43210000 | 4.16528100  | -0.20030300 | H                      | -3.99621300 | 4.43859600  | -1.01058100 |
| H                                          | 3.27003500  | 2.32218000  | -1.94174000 | H                      | 3.79231300  | 1.55760500  | -1.62407500 |
| H                                          | 2.27123200  | 1.38866600  | -3.06860500 | H                      | 2.86056800  | 0.59144700  | -2.78215100 |
| H                                          | 1.21191800  | -1.88333800 | 3.63527600  | H                      | 0.20742900  | -1.11167900 | 4.18444400  |
| H                                          | 0.31269700  | -1.36589500 | 5.06588100  | H                      | -1.03058000 | -0.82142000 | 5.42778600  |
| H                                          | -4.88753100 | 2.73464700  | 1.78871300  | H                      | -4.75600000 | 3.21461900  | 1.02510900  |
| H                                          | -4.34570900 | 0.33855500  | 1.74625300  | H                      | -4.46459300 | 0.77918700  | 1.19449200  |
| H                                          | 3.22717200  | 4.86247400  | 0.12128000  | H                      | 3.85239600  | 4.38222600  | 0.05154400  |
| H                                          | 4.48126100  | 3.64290000  | -0.10953300 | H                      | 4.88712200  | 2.97716500  | 0.31365400  |
| H                                          | 4.31808400  | 4.45792000  | 1.44108600  | H                      | 4.56074000  | 4.09169100  | 1.63580400  |
| N                                          | 0.78622700  | 2.82534700  | -0.97689900 | N                      | 1.30188400  | 2.54539100  | -1.22273900 |
| N                                          | -1.34722100 | -1.37186800 | 2.21592800  | N                      | -1.74117200 | -0.81186400 | 2.20145700  |
| O                                          | -0.69794400 | -0.46564800 | 1.50582500  | O                      | -0.81229300 | -0.06254000 | 1.66576800  |
| O                                          | 1.51971300  | 1.90350200  | -0.20351100 | O                      | 1.74720000  | 1.68807900  | -0.19666200 |
| Al                                         | -1.13999900 | -2.33347700 | -2.30632300 | Al                     | -1.03452400 | -2.56987400 | -1.86006600 |
| Al                                         | 2.48662300  | 2.60847700  | 1.25939400  | Al                     | 2.50100000  | 2.51955400  | 1.32399900  |
| K                                          | -1.00767500 | 2.03910100  | 0.89528600  | K                      | -0.89898400 | 2.23337300  | 0.33102500  |
| K                                          | 1.42393900  | -0.78513100 | -0.12565100 | K                      | 1.42117300  | -0.92690700 | 0.25235800  |
| H                                          | 4.10357900  | 1.19665600  | 2.73569900  | H                      | 3.42774100  | 1.22549500  | 3.38454400  |
| H                                          | 2.73693800  | 0.16937100  | 2.34737600  | H                      | 2.03424400  | 0.34216000  | 2.79025400  |
| H                                          | 4.01548000  | 0.45706400  | 1.14365200  | H                      | 3.61429200  | 0.18972700  | 1.98089100  |
| H                                          | 0.46988800  | 4.10189400  | 2.22790100  | H                      | 0.59312400  | 4.40382900  | 1.51740100  |
| H                                          | 0.54919700  | 2.56685800  | 3.14084800  | H                      | 0.25749800  | 3.10789500  | 2.70154200  |
| H                                          | 1.72444400  | 3.83032300  | 3.41039600  | H                      | 1.53544700  | 4.26582000  | 2.98091000  |
| C                                          | -3.20130600 | -1.10303400 | -0.35735700 | C                      | -3.32475000 | -0.93603800 | -0.70819900 |
| C                                          | -3.51846500 | -1.99156800 | 0.70516300  | C                      | -4.10239900 | -1.72145600 | 0.09740400  |
| H                                          | -2.48260500 | -1.74250800 | 1.53473100  | H                      | -2.47139700 | -1.15249100 | 1.54141300  |
| H                                          | -4.36510300 | -1.66515400 | 1.31204200  | H                      | -4.90228200 | -1.23468800 | 0.65030600  |
| O                                          | -2.55270400 | -1.45282400 | -1.39934500 | O                      | -2.38878000 | -1.35688000 | -1.52977100 |
| C                                          | -3.50118000 | -3.49202200 | 0.44677700  | C                      | -4.10887000 | -3.22513600 | 0.09136300  |

|                                          |             |             |             |                        |             |             |              |
|------------------------------------------|-------------|-------------|-------------|------------------------|-------------|-------------|--------------|
| H                                        | -4.28201900 | -3.79015500 | -0.26488600 | H                      | -5.12071700 | -3.60554500 | -0.10497700  |
| H                                        | -2.54225200 | -3.82232100 | 0.04235900  | H                      | -3.44791800 | -3.62320500 | -0.68121400  |
| H                                        | -3.67758900 | -4.04130300 | 1.37873200  | H                      | -3.79350800 | -3.66520800 | -1.05003300  |
| C                                        | -0.10183900 | -3.45277800 | -0.97750500 | C                      | -0.44494000 | -3.42990700 | -0.10868400  |
| H                                        | 0.96120800  | -3.52068300 | -1.26250100 | H                      | 0.59483600  | -3.79294100 | -0.17928300  |
| H                                        | -0.14238800 | -3.12756400 | 0.07353800  | H                      | -0.51645700 | -2.82641800 | 0.81023500   |
| H                                        | -0.47144300 | -4.48838900 | -0.98070800 | H                      | -1.05203400 | -4.32599700 | 0.08390800   |
| C                                        | -2.01829700 | -3.38642500 | -3.74787500 | C                      | -1.66323300 | -3.93985000 | -3.17005400  |
| H                                        | -2.64439800 | -2.76671900 | -4.40546900 | H                      | -2.04520400 | -3.48524200 | -4.09567600  |
| H                                        | -1.27446500 | -3.87311200 | -4.39676000 | H                      | -0.84126100 | -4.60809400 | -3.47119600  |
| H                                        | -2.66277900 | -4.18769800 | -3.35942400 | H                      | -2.46313300 | -4.59018400 | -2.78739300  |
| C                                        | -0.05258100 | -0.76813500 | -2.98805500 | C                      | 0.41645500  | -1.39413300 | -2.66023600  |
| H                                        | -0.03932900 | 0.12829500  | -2.34773600 | H                      | 0.46125100  | -0.35991500 | -2.28159500  |
| H                                        | 0.99626800  | -1.04032300 | -3.19444500 | H                      | 1.43080400  | -1.82248700 | -2.58588900  |
| H                                        | -0.46388500 | -0.42943100 | -3.95069100 | H                      | 0.22084800  | -1.29396900 | -3.73836600  |
| H                                        | 1.08715500  | 4.83220300  | -3.33211600 | H                      | 2.28352000  | 4.04957100  | -3.176171900 |
| H                                        | 0.16184900  | 3.46802700  | -3.96199700 | H                      | 1.26487500  | 2.72573700  | -4.33172200  |
| H                                        | -0.42057700 | 4.34249200  | -2.52036400 | H                      | 0.60935000  | 3.91001800  | -3.17056600  |
| H                                        | 2.88425700  | 2.97692600  | -3.55823400 | H                      | 3.79206900  | 1.98376500  | -3.35886900  |
| H                                        | -2.60839300 | -3.15081900 | 3.49327700  | H                      | -3.59611300 | -2.30320200 | 3.10446600   |
| H                                        | -1.12247300 | -3.75477300 | 4.25163000  | H                      | -2.51934100 | -2.94875400 | 4.35932300   |
| H                                        | -2.06258100 | -2.49955500 | 5.05558900  | H                      | -3.50951400 | -1.53115900 | 4.70515800   |
| H                                        | 0.52987400  | -0.25653300 | 3.67905300  | H                      | -0.59874500 | 0.44424000  | 4.23684300   |
| O                                        | 3.65638800  | -2.20524900 | -0.51124700 | O                      | 3.66539700  | -2.36242500 | 0.15168200   |
| C                                        | 4.75921700  | -2.72331500 | -0.40565200 | C                      | 4.75483700  | -2.90805500 | 0.04849200   |
| C                                        | 5.64019500  | -2.46766100 | 0.79809500  | C                      | 5.94042600  | -2.46145900 | 0.87620700   |
| H                                        | 5.66881000  | -3.37167500 | 1.42141700  | H                      | 6.43982900  | -3.31989900 | 1.34051300   |
| H                                        | 6.67255300  | -2.26074000 | 0.49324100  | H                      | 6.67921800  | -1.98024400 | 0.22182900   |
| H                                        | 5.24882000  | -1.63663900 | 1.38863800  | H                      | 5.62491500  | -1.74938800 | 1.64120400   |
| C                                        | 5.29459300  | -3.65037800 | -1.47516000 | C                      | 4.97158300  | -4.05528800 | -0.91433500  |
| H                                        | 5.68833400  | -4.57233900 | -1.03135600 | H                      | 5.14671700  | -4.97960900 | -0.34838100  |
| H                                        | 4.51282200  | -3.88629900 | -2.19972600 | H                      | 4.09654600  | -4.18600900 | -1.55379800  |
| H                                        | 6.13215500  | -3.16405700 | -1.99242600 | H                      | 5.86445700  | -3.88531700 | -1.52752800  |
| <b>TS(IVC<sub>m</sub>-2<sub>m</sub>)</b> |             |             |             | <b>lc'<sub>m</sub></b> |             |             |              |
| C                                        | -1.00670100 | 4.28903700  | -2.05210200 | C                      | 0.88410400  | -4.97258300 | 0.09507800   |
| C                                        | -4.48824500 | 2.30821700  | -0.90583300 | C                      | -1.31662900 | -2.61127700 | 1.06604200   |
| C                                        | -3.89010400 | 1.04720700  | -0.87951700 | C                      | 1.77363700  | -2.59526400 | 2.30095200   |
| C                                        | -5.39145900 | 2.68172200  | 0.09097900  | C                      | 0.52911800  | 2.70995400  | 3.68194800   |
| C                                        | 0.24423100  | 3.62641900  | -1.54224000 | C                      | 0.08664200  | 2.49256800  | 2.26008300   |
| C                                        | 1.55156000  | 3.90206200  | -2.24013400 | C                      | -1.29589000 | 2.93296000  | 1.85128400   |
| C                                        | -5.68962700 | 1.78090200  | 1.11615000  | C                      | 7.52322500  | -0.05475400 | 2.23012400   |
| C                                        | -4.19454000 | 0.12154900  | 0.13536900  | C                      | 1.20870800  | -2.83548500 | -3.27499000  |
| C                                        | 1.09133000  | -2.33352000 | 3.22812200  | C                      | 2.38592300  | -2.37073500 | -2.45651500  |
| C                                        | 0.42855900  | -3.06594900 | 2.09471900  | C                      | 3.75142500  | -2.37499800 | -3.08921900  |
| C                                        | -5.09479000 | 0.52013100  | 1.14129600  | C                      | 3.20714900  | 2.38855200  | -1.25224000  |
| C                                        | -0.08910300 | -4.46109900 | 2.30830400  | C                      | 0.75122500  | 4.65226200  | -0.96800300  |
| C                                        | 0.74036600  | 2.40850700  | 3.00308800  | C                      | 0.32269200  | 1.89147600  | -2.84856500  |
| C                                        | 2.49108000  | 4.77594000  | 1.39716800  | H                      | 0.68333600  | -5.69493900 | 0.90033400   |
| C                                        | 3.70234400  | 1.64742100  | 1.63494600  | H                      | 0.21975800  | -5.24896500 | -0.73789400  |
| H                                        | -4.25132800 | 2.99750500  | -1.71227200 | H                      | 1.91193500  | -5.16875800 | -0.24419300  |
| H                                        | -3.19035800 | 0.76521500  | -1.66027900 | H                      | -1.75391800 | 3.55447400  | 2.62662200   |
| H                                        | -5.85337900 | 3.66507800  | 0.07295700  | H                      | -1.25653900 | 3.49220700  | 0.91260600   |
| H                                        | 2.30885400  | 4.22675400  | -1.52099400 | H                      | 0.52789800  | -3.43490100 | -2.66592100  |
| H                                        | 1.93250400  | 2.99163000  | -2.72085800 | H                      | 1.54047100  | -3.42263300 | -4.13681400  |
| H                                        | 1.34270800  | -3.01555600 | 4.04636600  | H                      | 1.10134700  | 5.05529400  | -0.00604400  |
| H                                        | 0.43714700  | -1.54845500 | 3.63350500  | H                      | -0.33073000 | 4.84959200  | -1.01722400  |
| H                                        | -6.38048000 | 2.06431500  | 1.90620300  | H                      | 1.21084000  | 5.27907800  | -1.74700900  |
| H                                        | -5.31610800 | -0.16254200 | 1.95647700  | N                      | 0.92734300  | 1.93058500  | 1.46717100   |
| H                                        | 1.61906100  | 5.39640500  | 1.14263200  | N                      | 2.30748700  | -1.95547100 | -1.24304400  |
| H                                        | 3.26821900  | 5.00070400  | 0.65086300  | O                      | 1.00581100  | -1.91642400 | -0.71592200  |
| H                                        | 2.86926000  | 5.16065500  | 2.35627700  | O                      | 0.44655800  | 1.70484600  | 0.16600600   |
| N                                        | 0.12204100  | 2.85197300  | -0.52395900 | Al                     | 0.62427700  | -3.08873000 | 0.71041200   |
| N                                        | 0.29905700  | -2.51351700 | 0.93144500  | Al                     | 1.21170800  | 2.72209000  | -1.22584000  |
| O                                        | 0.75737300  | -1.28159900 | 0.71613700  | K                      | 2.68827100  | -0.05978100 | 0.72053400   |
| O                                        | 1.31761500  | 2.23656800  | -0.11185700 | K                      | -0.98539900 | -0.20037800 | -0.95538100  |
| Al                                       | -1.56098100 | -2.01619000 | -1.81030700 | H                      | 1.53554000  | -1.62428500 | 2.76806900   |
| Al                                       | 2.05586300  | 2.82825600  | 1.52237500  | H                      | 1.60175600  | -3.34040000 | 3.09253000   |
| K                                        | -0.91294800 | 0.74851400  | 0.93508100  | H                      | 2.85894900  | -2.62322600 | 2.11140200   |
| K                                        | 2.45960400  | -0.05625400 | -0.71449900 | H                      | 0.64406200  | 2.45682600  | -3.73644400  |
| H                                        | 4.32562800  | 2.00323600  | 2.46909300  | H                      | 0.61585500  | 0.84786200  | -3.05501600  |
| H                                        | 3.50026100  | 0.58572900  | 1.85287600  | H                      | -0.77911200 | 1.94677600  | -2.86108900  |
| H                                        | 4.34980800  | 1.70113900  | 0.74317500  | H                      | 3.69491100  | 2.57686300  | -0.28268700  |
| H                                        | -0.26081000 | 2.84608500  | 2.85210900  | H                      | 3.50174200  | 1.38329700  | -1.59554300  |
| H                                        | 0.61839000  | 1.33435400  | 3.22220500  | H                      | 3.67231700  | 3.08987200  | -1.96148100  |
| H                                        | 1.10713200  | 2.85203600  | 3.94085500  | H                      | -1.48122900 | -1.60609000 | 1.49049800   |
| C                                        | -3.55552900 | -1.22919200 | 0.13989800  | H                      | -1.97934100 | -2.72669900 | 0.19184300   |

|                                           |             |             |             |                        |             |             |             |
|-------------------------------------------|-------------|-------------|-------------|------------------------|-------------|-------------|-------------|
| C                                         | -4.19631500 | -2.30816300 | 0.63633100  | H                      | -1.70754100 | -3.30993400 | 1.82128700  |
| H                                         | -0.18987100 | -3.06154000 | -0.25591400 | C                      | 6.44469800  | 0.40953200  | 1.27385600  |
| H                                         | -5.22270900 | -2.16713300 | 0.96392000  | C                      | 6.87876600  | 1.25741300  | 0.09737800  |
| O                                         | -2.28822900 | -1.24313700 | -0.35518600 | H                      | 6.01075900  | 1.68018100  | -0.41365700 |
| C                                         | -3.63628200 | -3.69302300 | 0.75392300  | O                      | 5.27337800  | 0.10571800  | 1.44912200  |
| H                                         | -4.06678700 | -4.37704400 | 0.00813600  | H                      | 7.55379300  | 2.05852600  | 0.42056800  |
| H                                         | -2.55168100 | -3.69496400 | 0.62574000  | O                      | -3.61002400 | 0.19817400  | -0.99410100 |
| H                                         | -3.86147000 | -4.12239000 | 1.73962800  | C                      | -4.79339400 | 0.50620400  | -0.85766200 |
| C                                         | -0.28949700 | -3.82757500 | -1.36887300 | C                      | -5.63095700 | -0.14797300 | 0.19058300  |
| H                                         | 0.76550900  | -4.10799700 | -1.24132500 | C                      | -5.41701500 | 1.56274100  | -1.75995300 |
| H                                         | -0.90391600 | -4.69296000 | -1.09616000 | C                      | -6.97540200 | 0.20339200  | 0.40199800  |
| H                                         | -0.37857400 | -3.72679300 | -2.46252900 | C                      | -5.05183800 | -1.14690400 | -0.99284000 |
| C                                         | -2.94600500 | -2.88776200 | -2.92796000 | H                      | -5.80769200 | 2.36642600  | -1.11971200 |
| H                                         | -3.77533700 | -2.20042900 | -3.14603000 | H                      | -6.29991400 | 1.12095600  | -2.24266100 |
| H                                         | -2.54470600 | -3.21329500 | -3.89845800 | C                      | -4.45814300 | 2.12859100  | -2.80589400 |
| H                                         | -3.39120200 | -3.77267800 | -2.45478300 | C                      | -7.72181500 | -0.42870900 | 1.39432900  |
| C                                         | -0.28916300 | -0.75382300 | -2.69860400 | H                      | -7.44521000 | 0.97133400  | -0.20381200 |
| H                                         | -0.15776600 | 0.19256300  | -2.15516800 | C                      | -5.80009800 | -1.77774300 | 1.98188200  |
| H                                         | 0.70386800  | -1.20691800 | -2.84464200 | H                      | -4.01522000 | -1.42404100 | 0.83165500  |
| H                                         | -0.64955100 | -0.48320800 | -3.70155600 | H                      | -4.08683200 | 1.34186000  | -3.46976600 |
| H                                         | -0.90469800 | 5.38169800  | -2.01630200 | H                      | -4.96890800 | 2.87875600  | -3.41793200 |
| H                                         | -1.19087500 | 4.02029100  | -3.10121900 | H                      | -3.59140400 | 2.60405300  | -2.33727400 |
| H                                         | -1.87243200 | 3.99651900  | -1.45249600 | C                      | -7.13581900 | -1.41957500 | 2.18508600  |
| H                                         | 1.43164500  | 4.66995900  | -3.00993600 | H                      | -8.75973900 | -0.14867900 | 1.55035300  |
| H                                         | -0.51837000 | -4.87849700 | 1.39413400  | H                      | -5.34155100 | -2.54942200 | 2.59353100  |
| H                                         | 0.71494100  | -5.12923900 | 2.64694600  | H                      | -7.71952700 | -1.91233000 | 2.95799100  |
| H                                         | -0.86341000 | -4.48150500 | 3.08785800  | H                      | 1.54662700  | 2.33941000  | 3.83267800  |
| H                                         | 1.99709100  | -1.82595300 | 2.87935800  | H                      | 0.49999500  | 3.77738200  | 3.93725600  |
| O                                         | 4.81208800  | -1.21179800 | -1.27119700 | H                      | -1.94665800 | 2.06373600  | 1.68622100  |
| C                                         | 5.93268500  | -1.54439500 | -0.90759700 | H                      | 4.50331600  | -2.00183600 | -2.38874700 |
| C                                         | 6.81401200  | -2.40509200 | -1.78671900 | H                      | -0.14224300 | 2.19520400  | 4.38255300  |
| H                                         | 7.68025600  | -1.82033700 | -2.12251500 | H                      | 3.76530500  | -1.74774000 | -3.99083100 |
| H                                         | 7.20817700  | -3.25935300 | -1.22356700 | H                      | 4.03069100  | -3.39005000 | -3.40074100 |
| H                                         | 6.25588800  | -2.75561000 | -2.65703300 | H                      | 0.64399200  | -1.97439200 | -3.65985400 |
| C                                         | 6.49166400  | -1.12072800 | 0.43287600  | H                      | 7.11320100  | -0.77212500 | 2.94362200  |
| H                                         | 7.51267600  | -0.73591500 | 0.32697100  | H                      | 7.44397000  | 0.63338300  | -0.60796000 |
| H                                         | 5.85365200  | -0.36621000 | 0.89887600  | H                      | 8.36122600  | -0.50369100 | 1.68380700  |
| H                                         | 6.55192800  | -1.99737300 | 1.09184500  | H                      | 7.92588200  | 0.80893900  | 2.77526600  |
| <b>TS(lc<sub>m</sub>-llc<sub>m</sub>)</b> |             |             |             | <b>llc<sub>m</sub></b> |             |             |             |
| C                                         | -2.65825600 | 5.04453600  | 1.31012600  | C                      | -2.88532100 | 4.14291800  | 2.52957800  |
| C                                         | -0.05845800 | 3.23324800  | 2.42921200  | C                      | -0.39542300 | 1.89791700  | 2.88111600  |
| C                                         | -3.10762400 | 1.87631400  | 2.37823800  | C                      | -3.51360400 | 0.83971000  | 2.43723500  |
| C                                         | -1.15883900 | -2.85959200 | 3.44598800  | C                      | -1.27062900 | -3.91472400 | -2.93937400 |
| C                                         | 4.32900500  | 0.16648400  | -0.07253000 | C                      | 3.26953500  | -1.34534300 | 1.47702600  |
| C                                         | 4.12125200  | 1.28714800  | -0.90030800 | C                      | 2.84735300  | -0.38209600 | 2.41571400  |
| C                                         | -0.25092000 | -2.18600900 | 2.45201600  | C                      | -0.54800700 | -2.90341500 | -2.09140800 |
| C                                         | 1.22073100  | -2.14521500 | 2.76341900  | C                      | 0.95342100  | -2.96227700 | -1.98647400 |
| C                                         | 5.29533700  | 0.23997400  | 0.94464400  | C                      | 3.24330600  | -2.70635200 | 1.83722800  |
| C                                         | 4.85522800  | 2.45452400  | -0.70616600 | C                      | 2.40000300  | -0.76966800 | 3.67354600  |
| C                                         | 6.01583500  | 1.41658200  | 1.14711500  | C                      | 2.78926100  | -3.09068900 | 3.09563800  |
| C                                         | -1.39607200 | 4.25832800  | -2.31408800 | C                      | -1.54990600 | 4.62156500  | -1.14191900 |
| C                                         | 5.79798300  | 2.52380900  | 0.32493100  | C                      | 2.36631400  | -2.12584700 | 4.01319600  |
| C                                         | -2.42657900 | 3.17602400  | -2.11694000 | C                      | -2.65114500 | 3.61788800  | -1.36873300 |
| C                                         | -3.50655800 | 2.99974900  | -3.14972000 | C                      | -3.69096400 | 3.90102600  | -2.41926200 |
| C                                         | -0.54490600 | -0.94902900 | -2.51494900 | C                      | 2.41473600  | 2.78366700  | -1.69162200 |
| C                                         | 0.39683800  | -3.87247700 | -0.77151000 | C                      | 4.43550100  | 0.65957900  | -3.28537600 |
| C                                         | 2.20509600  | -2.49367200 | -3.09381500 | C                      | 5.58426400  | 2.40950700  | -0.57914600 |
| H                                         | -3.53439100 | 5.06084500  | 0.64524000  | H                      | -3.75593700 | 4.44242300  | 1.92752000  |
| H                                         | -2.99972200 | 5.44415800  | 2.27662000  | H                      | -3.20797400 | 4.19091800  | 3.58040700  |
| H                                         | -1.94328800 | 5.77957800  | 0.90989700  | H                      | -2.12797800 | 4.93158900  | 2.40452800  |
| H                                         | 3.40982200  | 1.21239500  | -1.71836000 | H                      | 2.89649700  | 0.67016000  | 2.15593100  |
| H                                         | 5.47130000  | -0.61196000 | 1.59370800  | H                      | 3.55629400  | -3.46901600 | 1.13302600  |
| H                                         | 1.64112800  | -3.15924800 | 2.81706900  | H                      | 1.34698900  | -3.90395800 | -2.38565700 |
| H                                         | 4.70152400  | 3.30648900  | -1.36250800 | H                      | 2.07048400  | -0.01672400 | 4.38219300  |
| H                                         | 1.74054500  | -1.58655500 | 1.98400000  | H                      | 1.42391400  | -2.13538600 | -2.53877300 |
| H                                         | -0.39530300 | 3.82282500  | -2.42929000 | H                      | -1.52246000 | 4.92689200  | -0.09125100 |
| H                                         | -1.35979100 | 4.91536900  | -1.43983200 | H                      | -1.69053500 | 5.50696200  | -1.76894400 |
| H                                         | 6.74883700  | 1.46803600  | 1.94682700  | H                      | 2.76101300  | -4.14363400 | 3.35936400  |
| H                                         | -0.58453000 | -3.86178400 | -0.28293900 | H                      | 3.63184800  | -0.02617700 | -3.59144300 |
| H                                         | 1.11614200  | -4.17751000 | 0.00330900  | H                      | 5.37489300  | 0.08970900  | -3.29519400 |
| H                                         | 0.39487600  | -4.67737800 | -1.52154900 | H                      | 4.52229200  | 1.39676400  | -4.09804100 |
| N                                         | -0.79039900 | -1.67667300 | 1.39460600  | N                      | -1.24729200 | -1.99709300 | -1.48553000 |
| N                                         | -2.44618200 | 2.37788400  | -1.11047500 | N                      | -2.76756500 | 2.51752400  | -0.71498300 |
| O                                         | -1.39099300 | 2.56308300  | -0.19923800 | O                      | -1.74651400 | 2.28930100  | 0.22294600  |
| O                                         | 0.01546500  | -1.03802300 | 0.49091500  | O                      | -0.57342500 | -1.07674000 | -0.76277800 |
| Al                                        | -1.87321000 | 3.21705600  | 1.50573100  | Al                     | -2.19827500 | 2.32948400  | 2.04743500  |

|                                           |             |             |             |                       |             |             |             |
|-------------------------------------------|-------------|-------------|-------------|-----------------------|-------------|-------------|-------------|
| AI                                        | 0.83422300  | -2.12771300 | -1.63897300 | AI                    | 4.05344000  | 1.63671600  | -1.59104000 |
| K                                         | -2.55823700 | -0.15632300 | -0.00837900 | K                     | -3.05901600 | -0.21764000 | -0.49301200 |
| K                                         | 0.86498700  | 1.33983300  | 0.24053000  | K                     | 0.51549700  | 0.95397300  | 0.04460400  |
| H                                         | -2.63252500 | 0.91475000  | 2.63403800  | H                     | -3.09958900 | -0.17948400 | 2.34742700  |
| H                                         | -3.46275900 | 2.28716100  | 3.33546200  | H                     | -3.83640200 | 0.92619800  | 3.48598500  |
| H                                         | -4.02108400 | 1.66211400  | 1.79940900  | H                     | -4.44258500 | 0.88151600  | 1.84571300  |
| H                                         | 1.69468700  | -3.00331700 | -3.92658600 | H                     | 6.00335400  | 3.27025800  | -1.12040200 |
| H                                         | 2.66149000  | -1.59015300 | -3.52798300 | H                     | 5.29497500  | 2.77911800  | 0.41466200  |
| H                                         | 3.02935100  | -3.15996700 | -2.79626900 | H                     | 6.41565500  | 1.70515100  | -0.43275800 |
| H                                         | -1.56126200 | -1.33815900 | -2.33935900 | H                     | 1.55076500  | 2.31072200  | -2.18402700 |
| H                                         | -0.55433600 | 0.10939900  | -2.21220400 | H                     | 2.08222600  | 3.21462300  | -0.73478400 |
| H                                         | -0.40658400 | -0.95090100 | -3.60548700 | H                     | 2.66054700  | 3.65044700  | -2.32359300 |
| H                                         | 0.31038800  | 2.25801900  | 2.79199900  | H                     | -0.08306300 | 0.84374200  | 2.79499600  |
| H                                         | 0.75258100  | 3.71594300  | 1.85498000  | H                     | 0.43481100  | 2.53386200  | 2.52778800  |
| H                                         | -0.16008700 | 3.84633200  | 3.33713300  | H                     | -0.46605900 | 2.09005400  | 3.96257500  |
| H                                         | 6.36673600  | 3.43613200  | 0.48023300  | H                     | 2.01160300  | -2.42936700 | 4.99408000  |
| C                                         | 3.49207300  | -1.04769600 | -0.28056500 | C                     | 3.72736500  | -0.89603400 | 0.14752600  |
| C                                         | 4.02274400  | -2.41541500 | 0.07905000  | C                     | 4.55201900  | -1.79590000 | -0.73624000 |
| H                                         | 3.22287400  | -3.13752100 | -0.09507400 | H                     | 4.50113500  | -1.40885900 | -1.75471000 |
| H                                         | 4.24230300  | -2.42851000 | 1.15533900  | H                     | 4.12684400  | -2.80421100 | -0.74029000 |
| O                                         | 2.35587400  | -0.89366100 | -0.75584800 | O                     | 3.46034400  | 0.27480300  | -0.20842800 |
| C                                         | 5.28878500  | -2.80467500 | -0.70946300 | C                     | 6.02247400  | -1.85120400 | -0.26256100 |
| H                                         | 6.11677100  | -2.11434600 | -0.52087100 | H                     | 6.10560600  | -2.26107300 | 0.74885500  |
| H                                         | 5.60781900  | -3.80882000 | -0.41349400 | H                     | 6.59797500  | -2.48820700 | -0.94071800 |
| H                                         | 5.08635600  | -2.81697000 | -1.78416300 | H                     | 6.47216900  | -0.85367400 | -0.26934000 |
| H                                         | -4.17934700 | 2.18416200  | -2.87171300 | H                     | -4.42532400 | 3.09230000  | -2.46800000 |
| H                                         | -4.09348800 | 3.92153300  | -3.25613300 | H                     | -4.21562500 | 4.84021600  | -2.19982500 |
| H                                         | -3.07218100 | 2.78064500  | -4.13441900 | H                     | -3.22610800 | 4.01914800  | -3.40745200 |
| H                                         | -1.61726000 | 4.85467600  | -3.20410600 | H                     | -0.57065700 | 4.18464900  | -1.37275300 |
| H                                         | 1.40404500  | -1.67289400 | 3.73892100  | H                     | 1.25735100  | -2.85242600 | -0.93782100 |
| H                                         | -1.07673700 | -2.39674100 | 4.43981700  | H                     | -1.10262700 | -4.94411000 | -2.58742400 |
| H                                         | -0.89970600 | -3.92127400 | 3.57047300  | H                     | -0.92877200 | -3.88475600 | -3.98471200 |
| H                                         | -2.20119900 | -2.79183600 | 3.12075200  | H                     | -2.34718200 | -3.71603000 | -2.93027700 |
| O                                         | -4.61686600 | -1.88372600 | -0.38458600 | O                     | -5.15696100 | -1.97440900 | -0.47619300 |
| C                                         | -4.84243300 | -3.07258800 | -0.20294500 | C                     | -5.22250900 | -3.17036200 | -0.22888700 |
| C                                         | -3.77129000 | -4.01971600 | 0.29107500  | C                     | -3.99096600 | -3.96778300 | 0.15011900  |
| H                                         | -3.43799800 | -4.64987600 | -0.54458800 | H                     | -3.89040200 | -3.95077300 | 1.24458800  |
| H                                         | -2.90984500 | -3.46698900 | 0.67468700  | H                     | -4.07371900 | -5.01688400 | -0.15219900 |
| H                                         | -4.16418000 | -4.69485900 | 1.06023300  | H                     | -3.09438800 | -3.51615400 | -0.28701500 |
| C                                         | -6.21302200 | -3.65545100 | -0.47715800 | C                     | -6.54484400 | -3.90583500 | -0.27136000 |
| H                                         | -6.84781100 | -2.91587000 | -0.96911400 | H                     | -7.36664300 | -3.20255800 | -0.41934300 |
| H                                         | -6.13524500 | -4.55750000 | -1.09574100 | H                     | -6.53374900 | -4.63327800 | -1.09364200 |
| H                                         | -6.67779700 | -3.95875600 | 0.47012700  | H                     | -6.69868200 | -4.47575500 | 0.65321700  |
| <b>TS(lc'<sub>m</sub>-2'<sub>m</sub>)</b> |             |             |             | <b>2'<sub>m</sub></b> |             |             |             |
| C                                         | 2.32251200  | -3.38026700 | 0.06380100  | C                     | -2.00734600 | -3.84255300 | 0.69163500  |
| C                                         | 0.12420600  | -0.72142500 | -2.36564300 | C                     | 0.35622500  | -2.05771800 | 2.35918600  |
| C                                         | -0.59014400 | -3.23593100 | -0.74019500 | C                     | 1.71727300  | 3.12935300  | 3.27814900  |
| C                                         | -3.77959500 | 2.13962300  | -3.38519300 | C                     | -4.39962400 | -0.10029000 | 0.37646800  |
| C                                         | 4.80680800  | -0.14215300 | -0.34365100 | C                     | -5.41855400 | 0.84558200  | 0.58603200  |
| C                                         | 6.10980100  | -0.06392400 | -0.86057300 | C                     | 1.03907500  | 3.03137500  | 1.93830100  |
| C                                         | -2.67554500 | 2.54420900  | -2.44602900 | C                     | -0.15059800 | 3.91394300  | 1.66122300  |
| C                                         | -1.68959700 | 3.59042100  | -2.89702700 | C                     | -4.24448800 | -0.62401400 | -0.92196100 |
| C                                         | 4.52262100  | 0.50376000  | 0.87260300  | C                     | -6.26036400 | 1.23935200  | -0.45460800 |
| C                                         | 7.10174100  | 0.64187600  | -0.18048500 | C                     | -5.08533100 | -0.22842500 | -1.96419300 |
| C                                         | 5.51552600  | 1.20178700  | 1.55597000  | C                     | -0.64581700 | -2.66622300 | -3.10100600 |
| C                                         | 1.41314300  | -0.76577300 | 3.35597400  | C                     | -6.09766100 | 0.70723900  | -1.73573700 |
| C                                         | 6.80826600  | 1.27596000  | 1.02872700  | C                     | 0.62860000  | -2.74291200 | -2.30089500 |
| C                                         | 0.02440400  | -1.21411100 | 2.98126900  | C                     | 1.81100000  | -3.46715500 | -2.88522400 |
| C                                         | -0.90845700 | -1.66904100 | 4.07092600  | C                     | 3.38841300  | 1.50994800  | -1.88130100 |
| C                                         | -3.10734700 | 1.99560700  | 2.26114700  | C                     | 2.12514800  | 4.60222300  | -1.52344800 |
| C                                         | -2.90833000 | 4.94837100  | 0.65219600  | C                     | 0.36090400  | 2.20701500  | -3.09785200 |
| C                                         | -0.14591900 | 3.49232400  | 1.91229300  | H                     | -2.46821000 | -4.20133600 | 1.62253900  |
| H                                         | 2.11266100  | -4.36432200 | -0.36740800 | H                     | -2.81433400 | -3.78674700 | -0.05329700 |
| H                                         | 3.26558000  | -3.44644800 | 0.62672300  | H                     | -1.32343500 | -4.63684900 | 0.35845200  |
| H                                         | 1.56529000  | -3.21549700 | 0.84422500  | H                     | -5.53607100 | 1.28425500  | 1.57270600  |
| H                                         | 6.33853700  | -0.54073400 | -1.80910600 | H                     | -3.47604400 | -1.37174900 | -1.09935200 |
| H                                         | 3.52221800  | 0.41860400  | 1.28585200  | H                     | -0.20873400 | 4.73128000  | 2.38631700  |
| H                                         | -2.09554400 | 4.17770800  | -3.72631300 | H                     | -7.03973200 | 1.97350600  | -0.26611800 |
| H                                         | 8.10399200  | 0.70039900  | -0.59641400 | H                     | -0.09701300 | 4.32800700  | 0.65126100  |
| H                                         | -1.42803600 | 4.25661100  | -2.07177200 | H                     | -1.51109600 | -2.87319600 | -2.46542600 |
| H                                         | 2.15198500  | -1.17823300 | 2.66359900  | H                     | -0.62897400 | -3.37412500 | -3.93481600 |
| H                                         | 1.66088700  | -1.06898100 | 4.37764400  | H                     | -4.95790500 | -0.66216600 | -2.95340000 |
| H                                         | 5.28544700  | 1.68377500  | 2.50278200  | H                     | 2.74126600  | 4.85333600  | -0.64748700 |
| H                                         | -3.85671100 | 4.79644300  | 0.11604300  | H                     | 1.21634500  | 5.21965500  | -1.45676100 |
| H                                         | -2.29271700 | 5.60884100  | 0.02266600  | H                     | 2.67801700  | 4.96651600  | -2.40216400 |
| H                                         | -3.15536700 | 5.52798100  | 1.55418600  | N                     | 1.51873900  | 2.17919600  | 1.10467700  |

|                                          |             |             |             |                       |             |             |             |
|------------------------------------------|-------------|-------------|-------------|-----------------------|-------------|-------------|-------------|
| N                                        | -2.63461600 | 1.95114300  | -1.30677500 | N                     | 0.78406900  | -2.21664000 | -1.13847900 |
| N                                        | -0.43164100 | -1.22654300 | 1.77926500  | O                     | -0.33349600 | -1.50574800 | -0.66789500 |
| O                                        | 0.46346900  | -0.73448700 | 0.81947200  | O                     | 0.81868400  | 2.08481000  | -0.11164400 |
| O                                        | -1.55606100 | 2.32143200  | -0.48495400 | Al                    | -1.05868800 | -2.11815700 | 0.94032800  |
| Al                                       | 0.79193100  | -1.74731600 | -0.72114900 | Al                    | 1.72886400  | 2.64909100  | -1.66476100 |
| Al                                       | -1.99545200 | 3.23168600  | 1.11069900  | K                     | 2.19936100  | -0.37942800 | 0.37816300  |
| K                                        | -2.51088900 | -0.33004100 | 0.22327400  | K                     | -1.40327200 | 0.94724500  | -0.90066800 |
| K                                        | 0.96965200  | 1.63963500  | -0.28305600 | H                     | 0.63858700  | -1.04058500 | 2.67627800  |
| H                                        | -1.56930900 | -2.85074800 | -1.07294800 | H                     | 0.00114200  | -2.56003700 | 3.26992800  |
| H                                        | -0.32568200 | -4.01979300 | -1.46623400 | H                     | 1.27456500  | -2.59277100 | 2.06965500  |
| H                                        | -0.74383800 | -3.73361100 | 0.22685200  | H                     | 0.76865100  | 2.54837300  | -4.06125200 |
| H                                        | -0.24999100 | 4.13641800  | 2.79827800  | H                     | 0.15431100  | 1.13273000  | -3.24426300 |
| H                                        | 0.33941600  | 2.57423800  | 2.28604900  | H                     | -0.60607500 | 2.73135600  | -3.00276600 |
| H                                        | 0.57432300  | 4.02252000  | 1.26423100  | H                     | 4.04709800  | 1.53077200  | -0.99849100 |
| H                                        | -4.02918300 | 1.63618700  | 1.77460100  | H                     | 3.20546000  | 0.45544900  | -2.14792800 |
| H                                        | -2.56301700 | 1.12014500  | 2.65231300  | H                     | 3.98838700  | 1.91846600  | -2.70835300 |
| H                                        | -3.44812400 | 2.54571300  | 3.15117900  | H                     | -6.75202700 | 1.01689300  | -2.54612200 |
| H                                        | -0.87863000 | -0.28419900 | -2.21909600 | C                     | -3.47579000 | -0.52275600 | 1.47306300  |
| H                                        | 0.76005500  | 0.08256400  | -2.77014900 | C                     | -3.91201700 | -0.66392500 | 2.74252800  |
| H                                        | -0.01337500 | -1.43626800 | -3.19168000 | O                     | -2.19139500 | -0.69681300 | 1.07788900  |
| H                                        | 7.58248000  | 1.82426600  | 1.55869700  | C                     | -3.06305400 | -1.02935600 | 3.92354100  |
| C                                        | 3.72213900  | -0.85252100 | -1.07705800 | H                     | -3.24447800 | -0.34584200 | 4.76478700  |
| C                                        | 3.96828200  | -2.03923100 | -1.82489600 | H                     | -3.28593300 | -2.04148600 | 4.29162000  |
| H                                        | 3.17605900  | -2.70019100 | -0.97356900 | H                     | -1.99845200 | -0.98996000 | 3.67856200  |
| H                                        | 5.00332900  | -2.38305900 | -1.80399900 | H                     | -4.97455500 | -0.52172900 | 2.92292300  |
| O                                        | 2.51553300  | -0.50692600 | -0.82236800 | O                     | 4.67189900  | -1.22834000 | 0.96698500  |
| C                                        | 3.26131000  | -2.33770700 | -3.14292100 | C                     | 5.88102700  | -1.35041500 | 0.82898500  |
| H                                        | 2.23568400  | -1.96251400 | -3.14787900 | H                     | 2.09662400  | 4.14573100  | 3.44613600  |
| H                                        | 3.78647600  | -1.87320900 | -3.98801900 | H                     | 1.00915600  | 2.91381000  | 4.08958700  |
| H                                        | 3.22649700  | -3.41764500 | -3.32693800 | H                     | -1.08273400 | 3.33659900  | 1.73691500  |
| H                                        | -0.76420100 | 3.11400000  | -3.25102800 | H                     | 2.55236800  | 2.42660600  | 3.34273800  |
| H                                        | 1.48948300  | 0.32870700  | 3.30179500  | H                     | -0.77771400 | -1.65842600 | -3.51751800 |
| H                                        | -0.47930300 | -2.51875000 | 4.61797700  | H                     | 1.55677800  | -4.51365100 | -3.09795900 |
| H                                        | -1.07347000 | -0.86663800 | 4.80243100  | H                     | 2.11417700  | -3.01153600 | -3.83744900 |
| H                                        | -1.87453300 | -1.96939900 | 3.65629700  | H                     | 2.65929900  | -3.44397000 | -2.19588200 |
| H                                        | -4.41038800 | 1.36964900  | -2.93275500 | C                     | 6.64487100  | -0.56082200 | -0.21195500 |
| H                                        | -4.40608900 | 3.00403100  | -3.64099600 | H                     | 7.23781900  | -1.23217000 | -0.84508200 |
| H                                        | -3.36737800 | 1.75266400  | -4.32695200 | H                     | 5.96017200  | 0.02507700  | -0.82887300 |
| O                                        | -4.57291900 | -2.02541300 | 0.07321000  | H                     | 7.35526000  | 0.11341600  | 0.28371300  |
| C                                        | -5.14923100 | -3.10312400 | 0.01559100  | C                     | 6.67395300  | -2.30178900 | 1.69979400  |
| C                                        | -4.38932600 | -4.41098500 | 0.00050000  | H                     | 6.02501000  | -2.75796700 | 2.44977700  |
| H                                        | -4.80302400 | -5.09830500 | -0.74641200 | H                     | 7.12470300  | -3.08694900 | 1.07949300  |
| H                                        | -3.32720100 | -4.24017300 | -0.18965600 | H                     | 7.50010000  | -1.77450100 | 2.19218000  |
| H                                        | -4.50296200 | -4.89999400 | 0.97775100  |                       |             |             |             |
| H                                        | -6.66041400 | -3.17698400 | -0.03658200 |                       |             |             |             |
| H                                        | -7.04141500 | -3.89753000 | 0.69678800  |                       |             |             |             |
| H                                        | -7.09559600 | -2.19194100 | 0.14306800  |                       |             |             |             |
| H                                        | -6.97352700 | -3.53600300 | -1.02579000 |                       |             |             |             |
| <b>TS(Ic<sub>m</sub>-Vc<sub>m</sub>)</b> |             |             |             | <b>Vc<sub>m</sub></b> |             |             |             |
| C                                        | 4.02520800  | -1.72820900 | -3.03913200 | C                     | -2.64435500 | -4.57530600 | 0.78190700  |
| C                                        | 3.83776600  | 1.18005500  | -1.36337500 | C                     | -3.42187100 | -1.45442100 | 1.75709000  |
| C                                        | 1.78224000  | 0.63270000  | -3.90919300 | C                     | -0.53212700 | -2.81881700 | 2.72419000  |
| C                                        | 0.02545100  | 4.46204700  | -1.92206200 | C                     | 0.02926400  | 1.74646800  | 4.44512300  |
| C                                        | -4.22682700 | -3.72261800 | 0.16893500  | C                     | 5.53062700  | -1.93556600 | 0.07653000  |
| C                                        | -3.88601300 | -2.47804400 | -0.36475000 | C                     | 4.77243600  | -1.16798300 | -0.81423000 |
| C                                        | -4.95443400 | -3.80178000 | 1.35728900  | C                     | 5.62148500  | -1.57345300 | 1.41982300  |
| C                                        | 0.35817400  | 3.81937800  | -0.60246100 | C                     | -0.44890200 | 1.99740600  | 3.04067500  |
| C                                        | 1.33870800  | 4.51182700  | 0.30736400  | C                     | -1.62058200 | 2.92123400  | 2.82749700  |
| C                                        | -5.34217900 | -2.62425500 | 2.00164400  | C                     | 4.94986500  | -0.43065500 | 1.86491400  |
| C                                        | -4.26212400 | -1.29038900 | 0.27400500  | C                     | 4.08395900  | -0.02582000 | -0.38299300 |
| C                                        | 1.66825800  | -3.36113400 | 0.11461400  | C                     | -1.67793900 | -3.06114300 | -2.68784200 |
| C                                        | 0.73746700  | -2.99682400 | -1.01354700 | C                     | -0.34320400 | -3.11449000 | -1.98849700 |
| C                                        | -5.00098400 | -1.38331600 | 1.46300800  | C                     | 4.19215400  | 0.33083600  | 0.97366800  |
| C                                        | -0.27797300 | -4.01114200 | -1.46560000 | C                     | 0.80754100  | -3.80181800 | -2.67268400 |
| C                                        | -2.76885000 | 0.82222800  | 1.00017100  | C                     | 2.84414500  | 0.11707700  | -2.61477100 |
| C                                        | -1.84994400 | 3.48018000  | 2.93668100  | C                     | 1.37225300  | 4.17148300  | 0.23743300  |
| C                                        | -0.25484000 | 0.46059600  | 3.35435600  | C                     | -0.46329500 | 2.45100500  | -2.06184400 |
| H                                        | 4.77439600  | -1.38172200 | -3.76641100 | H                     | -3.04147000 | -5.11028600 | 1.65756500  |
| H                                        | 4.58905000  | -2.19997000 | -2.21869400 | H                     | -3.46573500 | -4.53537800 | 0.04995800  |
| H                                        | 3.46466100  | -2.53443100 | -3.53409100 | H                     | -1.86983900 | -5.22699600 | 0.35142500  |
| H                                        | -3.93202800 | -4.63253500 | -0.34977900 | H                     | 6.05011400  | -2.81935700 | -0.28571800 |
| H                                        | -3.33187800 | -2.39523700 | -1.29377700 | H                     | 4.72205700  | -1.47326100 | -1.85445300 |
| H                                        | -5.22253900 | -4.76880900 | 1.77561400  | H                     | 6.21094900  | -2.16941700 | 2.11157300  |
| H                                        | 1.40889200  | 5.57616100  | 0.06419600  | H                     | -1.80346800 | 3.53217700  | 3.71661300  |
| H                                        | 1.05057100  | 4.39300200  | 1.35429800  | H                     | -1.44681000 | 3.57109600  | 1.96617800  |
| H                                        | 2.64063400  | -2.88092900 | -0.01718600 | H                     | -2.47919700 | -3.36947900 | -2.01074700 |

|                      |             |             |             |             |             |             |             |
|----------------------|-------------|-------------|-------------|-------------|-------------|-------------|-------------|
| H                    | 1.80126500  | -4.44609800 | 0.17337400  | H           | -1.68340800 | -3.70510400 | -3.57224700 |
| H                    | -5.91335200 | -2.67217400 | 2.92592400  | H           | 5.01896300  | -0.12891500 | 2.90755200  |
| H                    | -5.31182000 | -0.48051700 | 1.98277400  | H           | 3.66253600  | 1.21098800  | 1.32669500  |
| H                    | -2.27951100 | 4.15030800  | 2.17984100  | H           | 1.89181600  | 4.06857300  | 1.20122200  |
| H                    | -1.07964100 | 4.05570600  | 3.47058400  | H           | 0.52586200  | 4.85349100  | 0.40991000  |
| H                    | -2.64553500 | 3.27200500  | 3.66510600  | H           | 2.06123400  | 4.69965400  | -0.43541000 |
| N                    | -0.21689200 | 2.69852600  | -0.34160300 | N           | 0.17400500  | 1.39104100  | 2.09432700  |
| N                    | 0.73247200  | -1.86234000 | -1.61719300 | N           | -0.11457700 | -2.60417200 | -0.83165500 |
| O                    | 1.64950800  | -0.91695800 | -1.12547300 | O           | -1.21459200 | -1.94523500 | -0.25303900 |
| O                    | 0.17482100  | 2.11672400  | 0.88103500  | O           | -0.35368300 | 1.61776700  | 0.81109700  |
| Al                   | 2.84167800  | -0.23912300 | -2.42453600 | Al          | -1.94943500 | -2.76874100 | 1.28212400  |
| Al                   | -1.09757000 | 1.82371700  | 2.16006400  | Al          | 0.75820200  | 2.41058600  | -0.45487900 |
| K                    | -0.77110400 | 0.40011200  | -2.09949500 | K           | 1.19147400  | -0.91621700 | 0.92797600  |
| K                    | 2.16904400  | 0.36705600  | 1.08117200  | K           | -2.32473000 | 0.42900700  | -0.47560300 |
| H                    | 1.28188800  | 1.57671900  | -3.63331400 | H           | -0.27322900 | -1.83603100 | 3.15202000  |
| H                    | 2.47309500  | 0.90477000  | -4.72122700 | H           | -0.91086600 | -3.41001100 | 3.57147400  |
| H                    | 1.03399800  | -0.02743300 | -4.37678000 | H           | 0.40310400  | -3.31830000 | 2.42134500  |
| H                    | -0.91295300 | 0.23152400  | 4.20365200  | H           | -0.02566100 | 3.06770000  | -2.85996400 |
| H                    | -0.05550000 | -0.50705300 | 2.86719600  | H           | -0.64223800 | 1.46735500  | -2.52861000 |
| H                    | 0.68979700  | 0.81306700  | 3.79982900  | H           | -1.44431400 | 2.90937800  | -1.85216600 |
| H                    | -2.54216300 | 1.71379600  | 0.42035700  | H           | 2.13230500  | 0.72671300  | -3.17712000 |
| H                    | -2.06158900 | -0.00070400 | 1.00456100  | H           | 2.35625600  | -0.83630300 | -2.38428600 |
| H                    | -3.38755400 | 0.93893200  | 1.88686400  | H           | 3.70749300  | -0.08004500 | -3.26160300 |
| H                    | 3.21010800  | 2.00590000  | -0.98715000 | H           | -3.08145400 | -0.46583800 | 2.10905800  |
| H                    | 4.45795900  | 0.81772500  | -0.52641300 | H           | -4.16400800 | -1.29639200 | 0.95652400  |
| H                    | 4.54771600  | 1.65812900  | -2.05530600 | H           | -3.99033500 | -1.87728100 | 2.59917000  |
| C                    | -3.87179600 | 0.04170500  | -0.39127900 | C           | 3.22517000  | 0.85886700  | -1.31749400 |
| C                    | -5.07006300 | 1.02295100  | -0.48293300 | C           | 4.06879900  | 2.12922000  | -1.64135800 |
| H                    | -5.83620100 | 0.49472100  | -1.06993600 | H           | 4.18103200  | 2.68927800  | -0.70523100 |
| O                    | -3.13545300 | -0.04633600 | -1.44190200 | O           | 2.04076100  | 1.16656900  | -0.61680400 |
| C                    | -4.74442100 | 2.34439000  | -1.17715800 | C           | 3.51793200  | 3.05508500  | -2.73176100 |
| H                    | -5.65178300 | 2.94208300  | -1.32266600 | H           | 4.13333500  | 3.95949300  | -2.80105300 |
| H                    | -4.04214400 | 2.95249900  | -0.59325600 | H           | 3.52681000  | 2.57613000  | -3.71694200 |
| H                    | -4.29283100 | 2.15273400  | -2.15486200 | H           | 2.49239500  | 3.37580600  | -2.52450600 |
| H                    | -5.50970600 | 1.20651300  | 0.50407700  | H           | 5.07745600  | 1.80539100  | -1.93164300 |
| O                    | 4.32822700  | -0.56909100 | 2.33543500  | O           | -4.78610100 | 1.19677300  | -1.14692600 |
| C                    | 5.43054400  | -1.09865900 | 2.39716800  | C           | -5.99748300 | 1.36572800  | -1.10447400 |
| C                    | 6.07653200  | -1.73208700 | 1.18545100  | C           | -6.86432900 | 0.63267800  | -0.10442500 |
| C                    | 6.20063400  | -1.14551600 | 3.69871600  | C           | -6.68727200 | 2.31866600  | -2.05612100 |
| H                    | 7.09912100  | -0.52033800 | 3.61507400  | H           | -7.11649400 | 3.15688600  | -1.49226400 |
| H                    | 6.54374300  | -2.16494700 | 3.91121300  | H           | -7.52085100 | 1.82079400  | -2.56590500 |
| H                    | -0.70479100 | 3.86753200  | -2.47777000 | H           | 0.87344000  | 1.05195600  | 4.45055900  |
| H                    | -0.38859500 | 5.46624200  | -1.76630600 | H           | 0.33978500  | 2.68546800  | 4.92178900  |
| H                    | 2.34102000  | 4.07830700  | 0.18695000  | H           | -2.53364700 | 2.34370300  | 2.62620500  |
| H                    | -0.86874700 | -3.61862700 | -2.29702600 | H           | 1.70649300  | -3.76416100 | -2.05179500 |
| H                    | 0.92877000  | 4.57746300  | -2.53532400 | H           | -0.77683700 | 1.32554200  | 5.06085300  |
| H                    | -0.95955000 | -4.27192600 | -0.64493400 | H           | 1.02421700  | -3.33175100 | -3.64148700 |
| H                    | 0.21539100  | -4.93794100 | -1.78600500 | H           | 0.56257800  | -4.85274000 | -2.87495500 |
| H                    | 1.25262000  | -3.03494200 | 1.07952800  | H           | -1.90254400 | -2.03701100 | -3.01592000 |
| H                    | 7.11291400  | -1.39235500 | 1.07430600  | H           | -7.51363400 | 1.33394200  | 0.43309900  |
| H                    | 6.11532900  | -2.82100900 | 1.32175300  | H           | -7.52507200 | -0.06550700 | -0.63479000 |
| H                    | 5.51257300  | -1.50463100 | 0.27851000  | H           | -6.24741600 | 0.07537400  | 0.60354300  |
| H                    | 5.58157100  | -0.77995600 | 4.52026100  | H           | -5.97651600 | 2.70290400  | -2.79023600 |
| <b>TS(lc'm-Vc'm)</b> |             |             |             | <b>Vc'm</b> |             |             |             |
| C                    | -0.81532800 | -4.34875800 | 1.59374800  | C           | 1.24265000  | -4.28801600 | 0.03916400  |
| C                    | -2.66798900 | -1.56384000 | 0.72730900  | C           | 2.94679800  | -0.45558300 | -2.56092100 |
| C                    | 0.06274900  | -1.26883900 | 2.79594400  | C           | -0.31305000 | -2.29866700 | -2.19725400 |
| C                    | 0.31989900  | 4.05617500  | 1.73787800  | C           | -1.01069400 | 3.22843100  | -3.33934000 |
| C                    | 0.20993200  | 3.35181000  | 0.41176500  | C           | -0.55115800 | 3.07236500  | -1.91473500 |
| C                    | -0.86767900 | 3.79438500  | -0.54137600 | C           | 0.60720400  | 3.90521700  | -1.42786400 |
| C                    | 6.15665700  | -0.28803500 | 3.93682000  | C           | -6.72228000 | -1.61546100 | -2.48626300 |
| C                    | 0.74374000  | -3.54203800 | -2.47725300 | C           | -0.33312600 | -2.60097000 | 3.39965500  |
| C                    | 1.73765500  | -3.11697400 | -1.42959300 | C           | -1.47541900 | -2.62457100 | 2.41749300  |
| C                    | 3.17078200  | -3.54690200 | -1.59295400 | C           | -2.79546600 | -3.20153900 | 2.85156200  |
| C                    | 3.95951900  | 1.16675100  | -1.58487200 | C           | -3.49370300 | 1.66926300  | 1.54403900  |
| C                    | 2.37865300  | 3.85336900  | -2.81682700 | C           | -2.05087800 | 4.68951300  | 1.31003600  |
| C                    | 1.52217500  | 0.74669300  | -3.81290700 | C           | -0.61945700 | 2.25015100  | 3.13572700  |
| H                    | -1.39943000 | -4.58058000 | 2.49481500  | H           | 1.77785300  | -4.83608300 | -0.74925000 |
| H                    | -1.30602500 | -4.86135300 | 0.75520200  | H           | 1.88660700  | -4.31584300 | 0.93059300  |
| H                    | 0.16678500  | -4.82495300 | 1.72614000  | H           | 0.34928200  | -4.88442100 | 0.27612500  |
| H                    | -1.08349800 | 4.85981400  | -0.40992200 | H           | 0.86707900  | 4.67817400  | -2.15721500 |
| H                    | -0.57687000 | 3.60883400  | -1.57656900 | H           | 0.36531200  | 4.37671700  | -0.47147000 |
| H                    | -0.27035300 | -3.55489500 | -2.07493100 | H           | 0.59934100  | -2.89424000 | 2.91031800  |
| H                    | 0.99729900  | -4.53338600 | -2.86705400 | H           | -0.52816500 | -3.26821200 | 4.24455500  |
| H                    | 2.64982100  | 4.49469600  | -1.96538700 | H           | -2.50225500 | 4.95320300  | 0.34211900  |
| H                    | 1.44650600  | 4.26263300  | -3.23440700 | H           | -1.12143900 | 5.27295000  | 1.39433800  |

|    |             |             |             |    |             |             |             |
|----|-------------|-------------|-------------|----|-------------|-------------|-------------|
| H  | 3.15327000  | 4.01361900  | -3.58151900 | H  | -2.72919800 | 5.08374000  | 2.08152200  |
| N  | 1.04239800  | 2.39638900  | 0.19592800  | N  | -1.18390500 | 2.22217700  | -1.18782400 |
| N  | 1.46412000  | -2.39679300 | -0.39954700 | N  | -1.40513300 | -2.17005600 | 1.21741200  |
| O  | 0.11978200  | -1.96633400 | -0.31631500 | O  | -0.16750800 | -1.59250500 | 0.88530000  |
| O  | 0.87588300  | 1.71277600  | -1.02435900 | O  | -0.68676900 | 2.08350400  | 0.11961900  |
| Al | -0.64027000 | -2.39947600 | 1.30943500  | Al | 0.75959800  | -2.43618700 | -0.50202200 |
| Al | 2.22848800  | 1.92542700  | -2.32128700 | Al | -1.76533300 | 2.72330300  | 1.52883700  |
| K  | 2.24136600  | 0.02119400  | 0.76188600  | K  | -2.21427800 | -0.26412100 | -0.62224500 |
| K  | -0.91038700 | 0.02808600  | -2.01094500 | K  | 1.23147100  | 0.66484100  | 1.22683300  |
| H  | 0.00071000  | -0.18510500 | 2.61309300  | H  | -0.41647800 | -1.27766700 | -2.59984800 |
| H  | -0.52746300 | -1.44937400 | 3.70538100  | H  | 0.16595200  | -2.87939700 | -2.99949200 |
| H  | 1.10233100  | -1.51071400 | 3.06752000  | H  | -1.32330100 | -2.72695600 | -2.09522800 |
| H  | 2.23506700  | 0.79119800  | -4.64989600 | H  | -1.09307900 | 2.68522600  | 4.02861900  |
| H  | 1.44119600  | -0.32611100 | -3.56618300 | H  | -0.53625500 | 1.17218700  | 3.35729000  |
| H  | 0.56012000  | 1.07035600  | -4.24574100 | H  | 0.39872600  | 2.67660900  | 3.12139600  |
| H  | 4.27718800  | 1.62733100  | -0.63540800 | H  | -4.04895300 | 1.72529900  | 0.59396200  |
| H  | 3.98626900  | 0.07094200  | -1.46035700 | H  | -3.38625200 | 0.60647200  | 1.81699500  |
| H  | 4.76060800  | 1.39557500  | -2.30384400 | H  | -4.16219300 | 2.10168700  | 2.30379500  |
| H  | -2.11457900 | -0.64876200 | 0.90725600  | H  | 2.33375700  | 0.44914900  | -2.48595700 |
| H  | -2.38888800 | -2.21870600 | -0.09132900 | H  | 2.35764300  | -1.21186700 | -2.08822600 |
| H  | -3.15314800 | -2.01845200 | 1.58761900  | H  | 3.82907700  | -0.22818200 | -3.16915500 |
| C  | 5.62120500  | -0.09234300 | 2.53485500  | C  | -5.89003900 | -0.94643600 | -1.41285700 |
| C  | 6.62739800  | 0.18565800  | 1.43950100  | C  | -6.62309600 | -0.39840800 | -0.20736700 |
| H  | 6.12101700  | 0.45230900  | 0.50917900  | H  | -5.94665700 | 0.18299000  | 0.42301100  |
| O  | 4.42166500  | -0.15957100 | 2.30227500  | O  | -4.67495500 | -0.85805000 | -1.52023600 |
| H  | 7.31318700  | 0.98808000  | 1.73615900  | H  | -7.47232900 | 0.22195900  | -0.51759600 |
| O  | -3.32395500 | -0.15265800 | -1.38589600 | O  | 2.10814400  | -1.23249600 | -0.44137300 |
| C  | -3.98459200 | -0.62455600 | -0.38955800 | C  | 3.30154000  | -0.98941100 | -1.16044100 |
| C  | -4.53150500 | 0.40498600  | 0.61084400  | C  | 4.09521900  | 0.04055100  | -0.32376500 |
| C  | -5.01685900 | -1.73341400 | -0.71491300 | C  | 4.11610700  | -2.30809700 | -1.28580500 |
| C  | -5.16161500 | 0.06346800  | 1.81652500  | C  | 4.55488600  | 1.26591700  | -0.82332600 |
| C  | -4.43044300 | 1.76148200  | 0.27868100  | C  | 4.33136400  | -0.23803000 | 1.03635200  |
| H  | -5.88663700 | -1.20642200 | -1.13516600 | H  | 3.49322500  | -3.02324700 | -1.83887200 |
| H  | -5.36714900 | -2.22664600 | 0.19870700  | H  | 4.23152900  | -2.72428900 | -0.27815200 |
| C  | -4.53178300 | -2.76595100 | -1.73112200 | C  | 5.49038700  | -2.20215400 | -1.95663100 |
| C  | -5.65838700 | 1.04791200  | 2.67068700  | C  | 5.21073100  | 2.18725700  | 0.00276000  |
| H  | -5.25906700 | -0.98097000 | 2.10105200  | H  | 4.40560000  | 1.51760800  | -1.86811400 |
| C  | -4.92819500 | 2.75107000  | 1.12908300  | C  | 4.98670000  | 0.67472000  | 1.86336300  |
| H  | -3.96714800 | 2.01514200  | -0.66941300 | H  | 3.98667400  | -1.18380100 | 1.44595100  |
| H  | -3.71898600 | -3.38512700 | -1.33024000 | H  | 6.13844600  | -1.48600000 | -1.43888600 |
| H  | -5.34470500 | -3.44330100 | -2.01683100 | H  | 5.99472400  | -3.17500000 | -1.94458900 |
| H  | -4.16460700 | -2.26445600 | -2.63142300 | H  | 5.41446800  | -1.88849500 | -3.00373200 |
| C  | -5.54147400 | 2.39855200  | 2.33190700  | C  | 5.42579600  | 1.90002600  | 1.34915300  |
| H  | -6.13832300 | 0.76021500  | 3.60314800  | H  | 5.55340300  | 3.13091300  | -0.41437200 |
| H  | -4.84452600 | 3.79849800  | 0.84735500  | H  | 5.16186500  | 0.42809100  | 2.90814600  |
| H  | -5.93004400 | 3.16554900  | 2.99711400  | H  | 5.93541400  | 2.61418400  | 1.99031500  |
| H  | 1.11754900  | 3.61970300  | 2.34525200  | H  | -1.85129400 | 2.56232800  | -3.55163300 |
| H  | 0.52999000  | 5.12361800  | 1.59207100  | H  | -1.32221300 | 4.26323200  | -3.53297500 |
| H  | -1.79874700 | 3.24666100  | -0.33864900 | H  | 1.49516800  | 3.27920200  | -1.26706500 |
| H  | 3.78854100  | -3.16482400 | -0.77598400 | H  | -3.52548500 | -3.14982200 | 2.03939000  |
| H  | -0.62595300 | 3.98839500  | 2.29167700  | H  | -0.19511700 | 3.00428200  | -4.04009800 |
| H  | 3.57755700  | -3.18205300 | -2.54517100 | H  | -3.19091000 | -2.65820200 | 3.72030500  |
| H  | 3.24467100  | -4.64173900 | -1.60993900 | H  | -2.67811500 | -4.24983100 | 3.15549100  |
| H  | 0.77102700  | -2.84800500 | -3.32971400 | H  | -0.19282800 | -1.58698300 | 3.79896500  |
| H  | 5.35559000  | -0.60206300 | 4.60869100  | H  | -6.07505600 | -2.06969500 | -3.23898100 |
| H  | 7.24236600  | -0.70901200 | 1.27429000  | H  | -7.03750900 | -1.23096200 | 0.37661300  |
| H  | 6.96513900  | -1.02876100 | 3.94390800  | H  | -7.38011200 | -2.37601800 | -2.04889600 |
| H  | 6.58717500  | 0.65407100  | 4.30028900  | H  | -7.37218900 | -0.87204600 | -2.96577700 |
